# Supplementary material for: B-Cell Responses to Human Bocaviruses 1–4: New Insights from a Childhood Follow-Up Study
Source: PubMed Central journal article supplement (PMC4587975; doi:10.1371/journal.pone.0139096), 2015-09-29

# S1 Supporting Information. ELISA results of all 109 children in graphical format.

## Symbol or annotation

## Description

2

Subject number. There are three graphs for each subject and a row corresponds to one subject.

● HBoV1

□ HBoV2

★ HBoV3

Single immobilized antigen used for IgG detection

□ HBoV2 & HBoV3

Two immobilized antigens used simultaneously for IgG detection.

No competition

Samples were not competed with soluble antigens prior to the assay.

Homologous competition

Samples were preincubated with soluble HBoV1 antigen before HBoV1 IgG detection or with HBoV2+HBoV3 antigens before combined detection of HBoV2 and HBoV3 IgG. The resulting residual optical density (ROD) was used for the calculation of net OD in heterologous competition; net OD = raw OD - residual OD.

Heterologous competition

For HBoV1 IgG detection, the samples were preincubated with soluble HBoV2 and HBoV3 antigens. For HBoV2 or HBoV3 detection, the serum samples were preincubated with HBoV1 antigen. The net OD shown in the graphs was obtained by subtracting ROD from the raw OD; net OD = raw OD - residual OD.

● ● ●  
□ □ □  
★ ★ ★

**Black**, **blue** and **red** data points indicate whether the sample has **not been tested** by PCR for HBoV DNA, has been **negative** by PCR or has been tested **positive** by PCR.

○ □

Red open circle or red open rectangle around a data point indicates that the sample has been positive in IgM for HBoV1 or HBoV2, respectively. All sera tested by PCR for any of the three viruses were tested for HBoV1-3 IgM. IgM negativity is not separately indicated. Red data point surrounded by a red open circle or rectangle indicates that the sample has been positive for IgM and HBoV DNA.

■ ↓ ○ ↓

PCR positive (closed symbol) or IgM positive (open symbol) sample that is below the range of the y-axis.

1

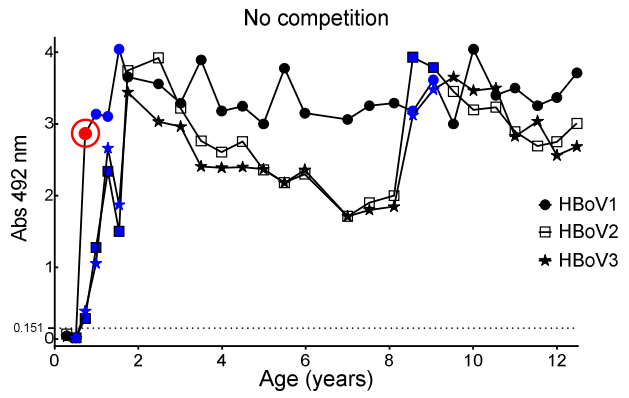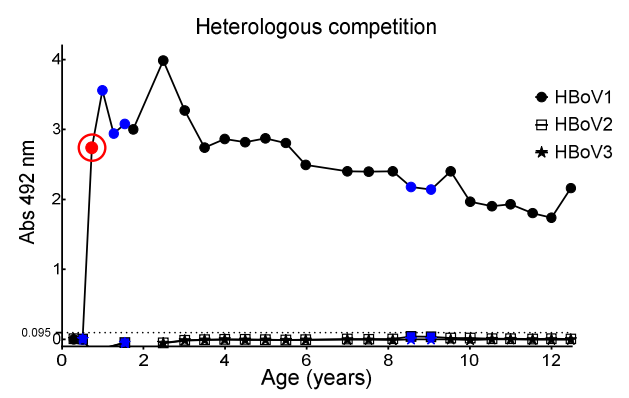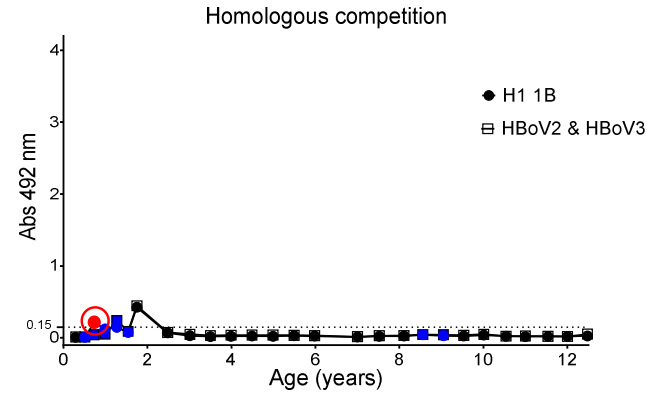

2

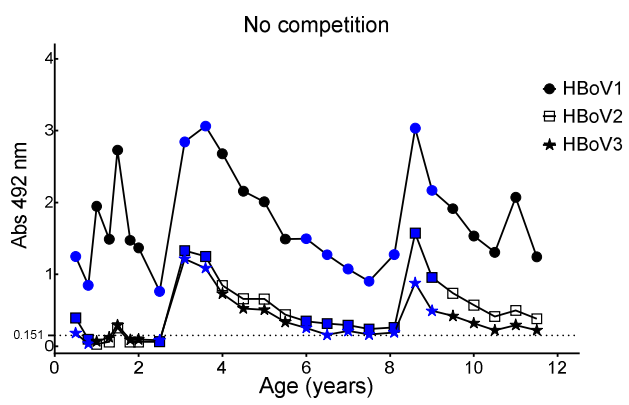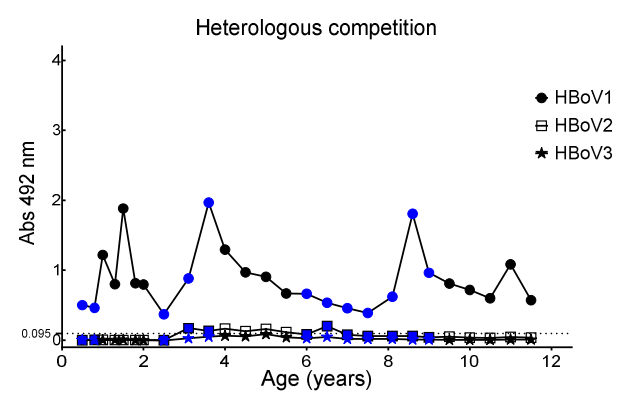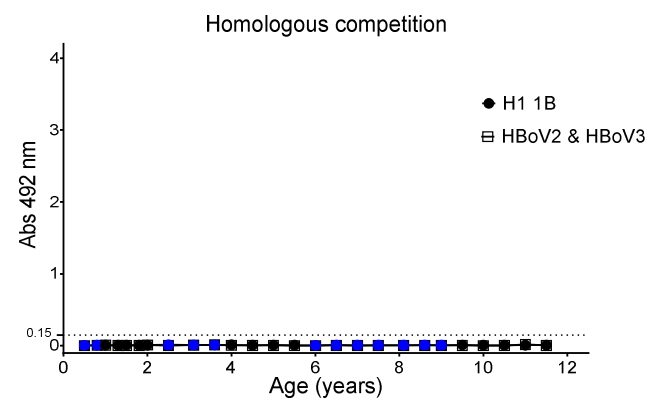

3

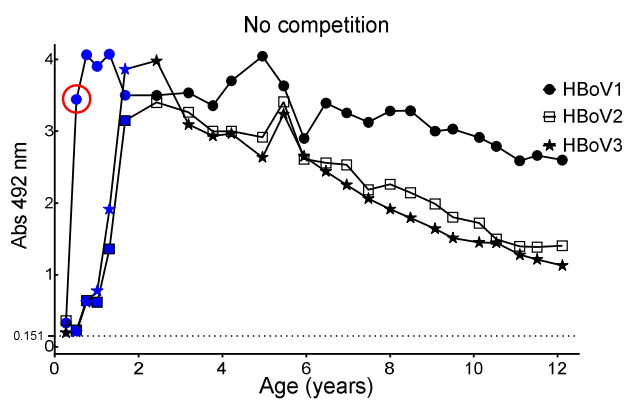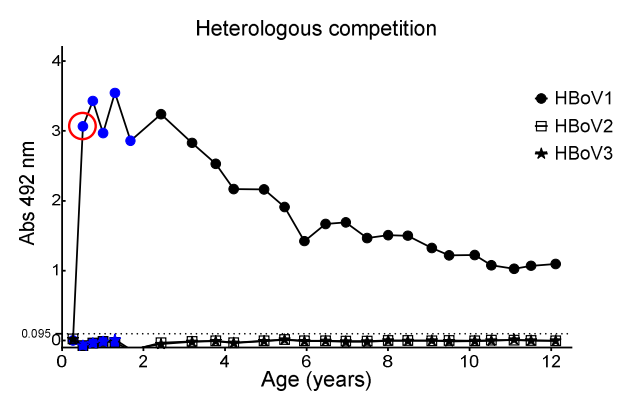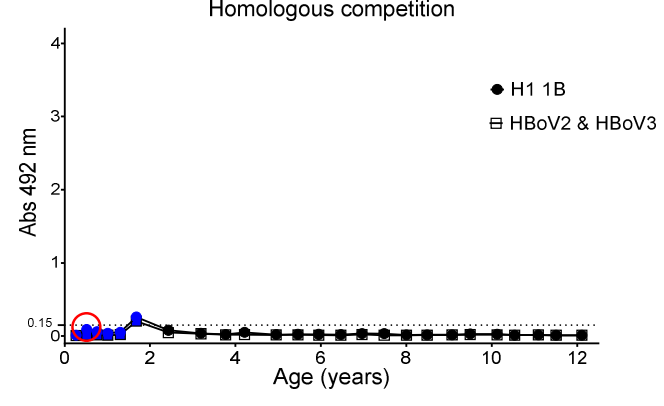

4

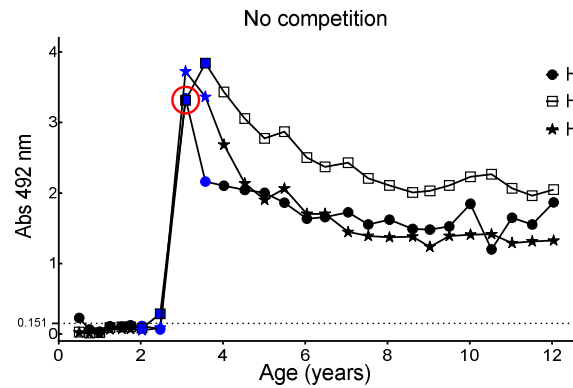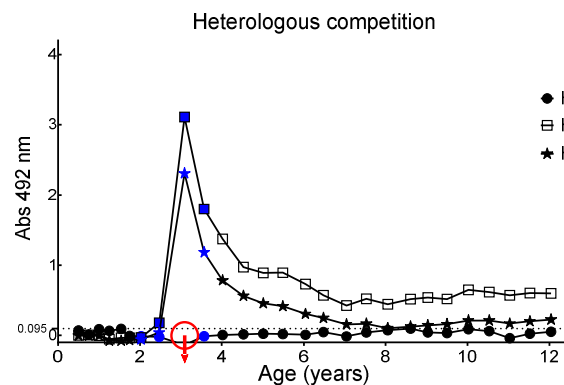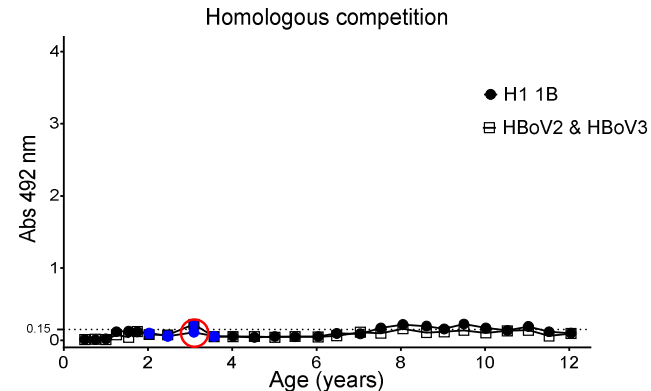

5

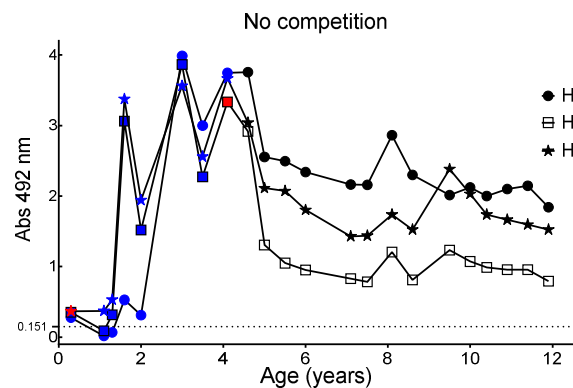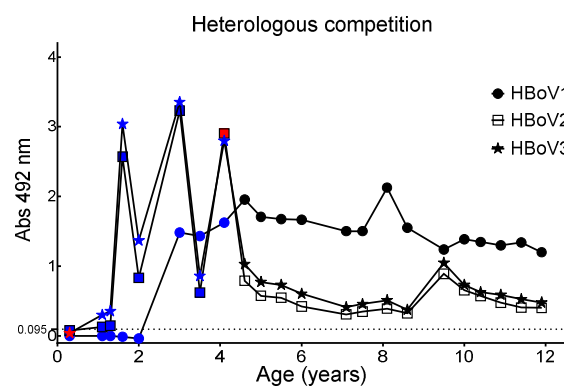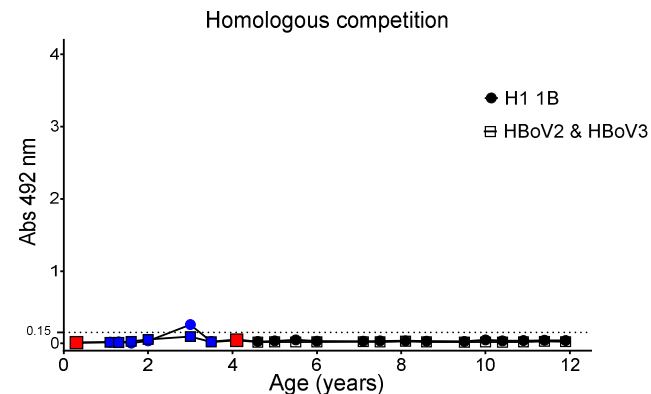

6

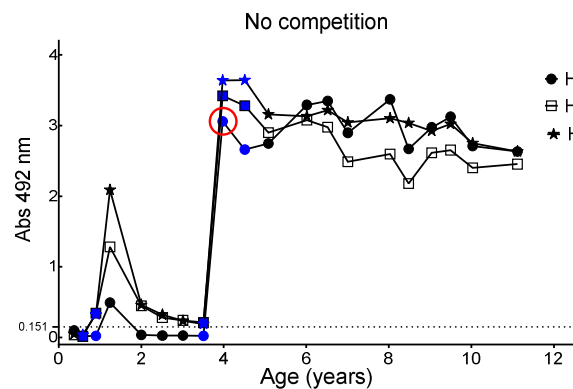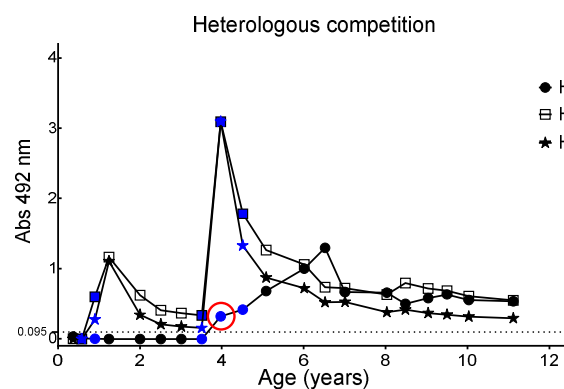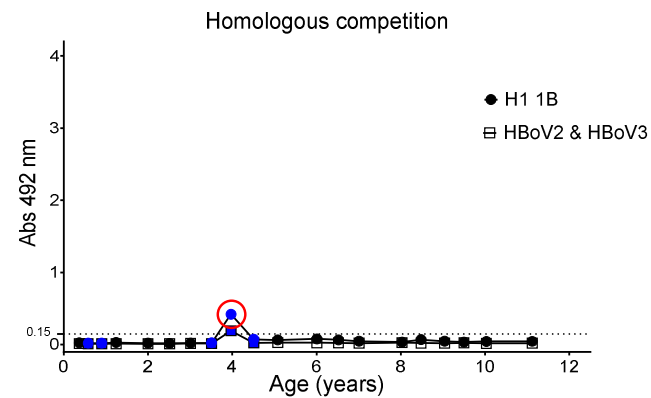

7

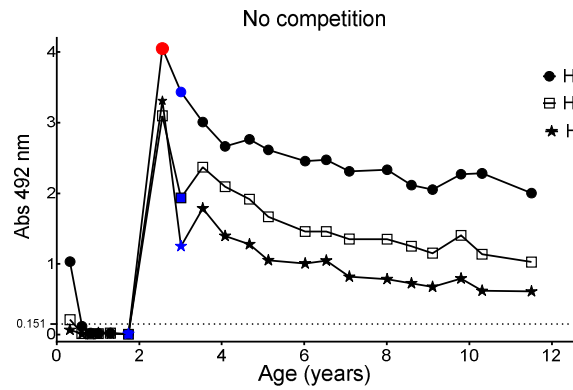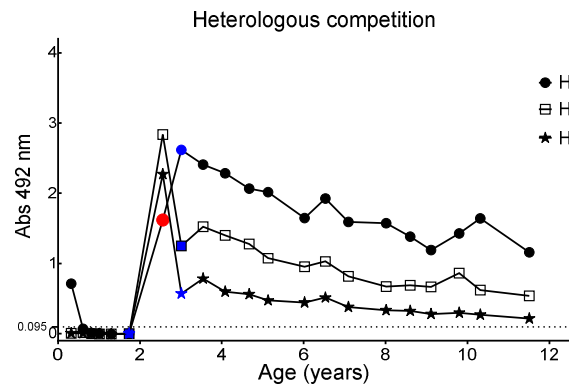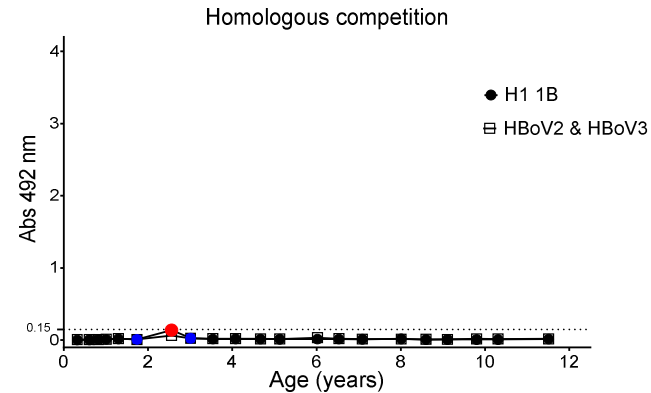

8

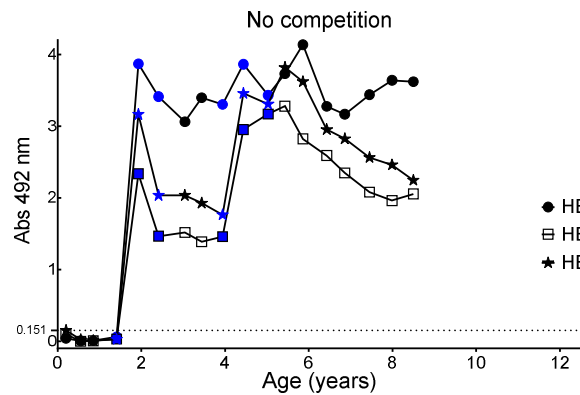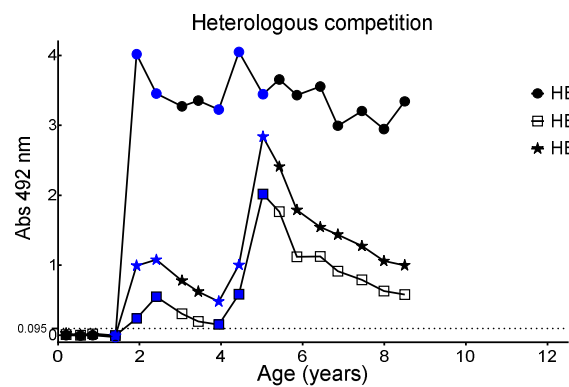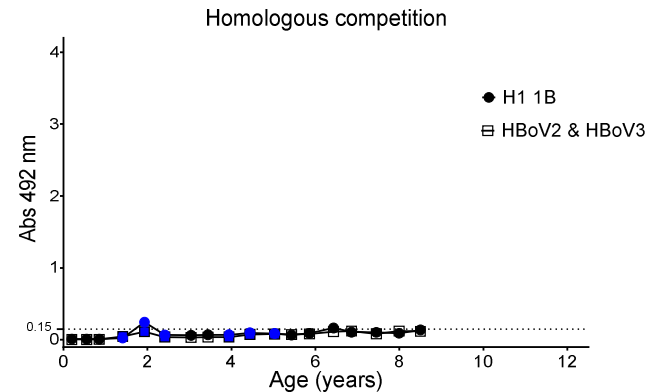

9

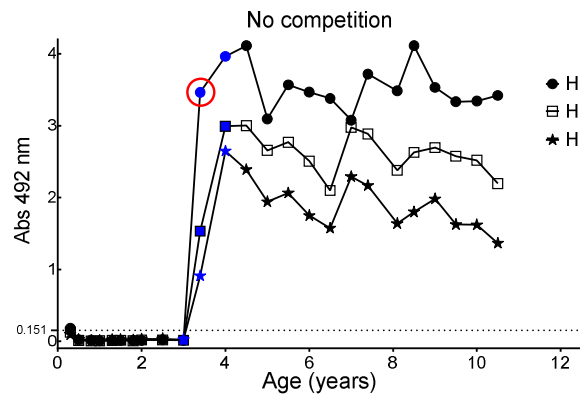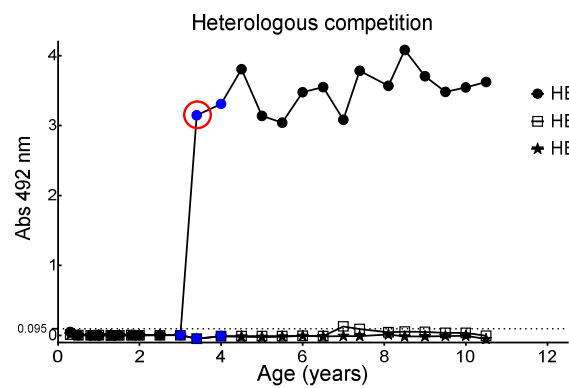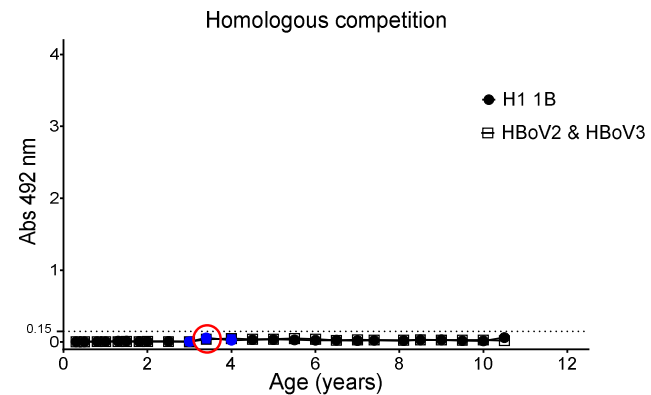

10

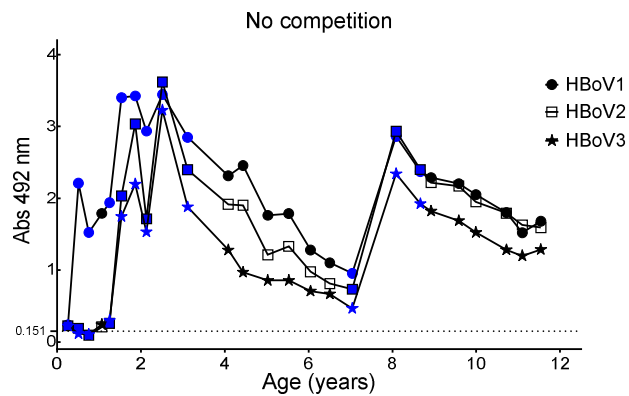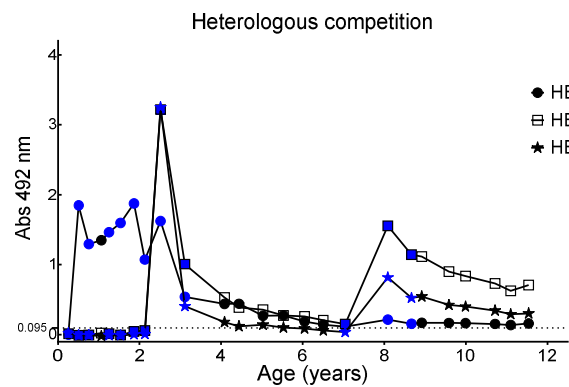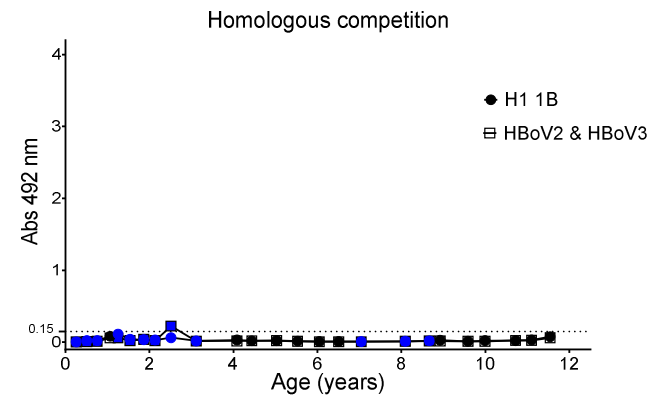

11

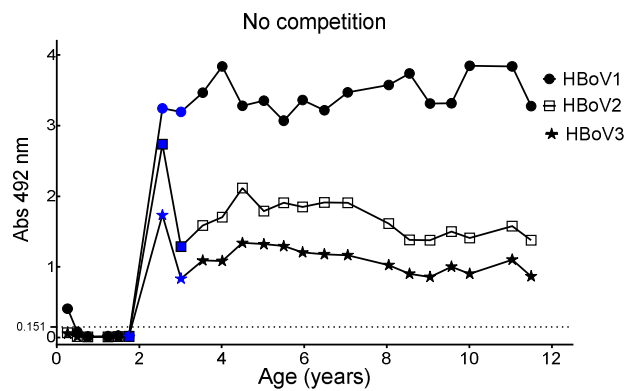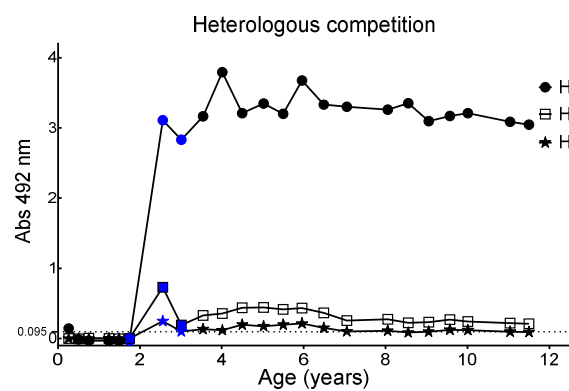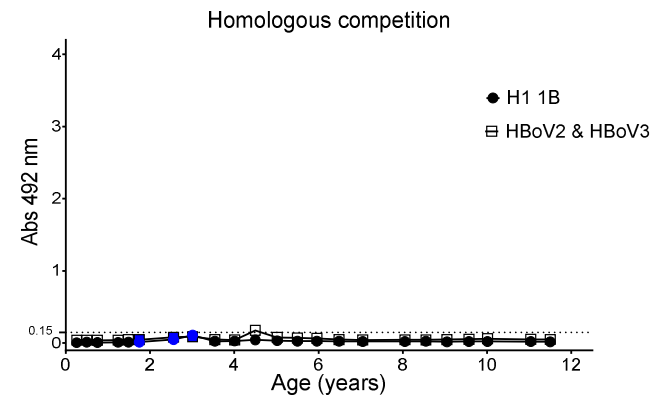

12

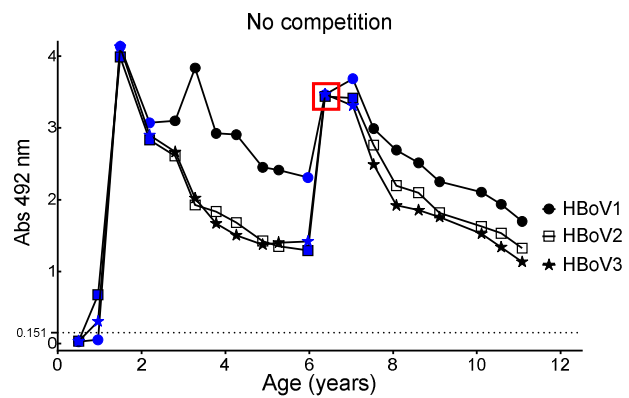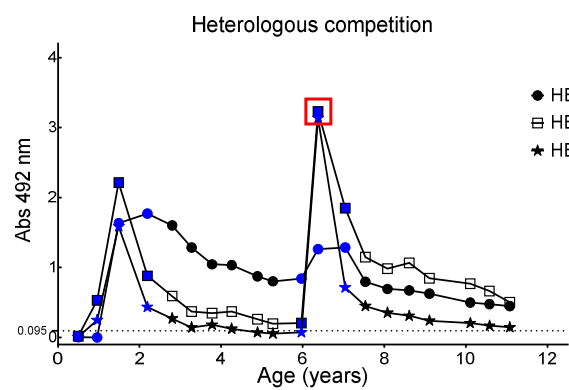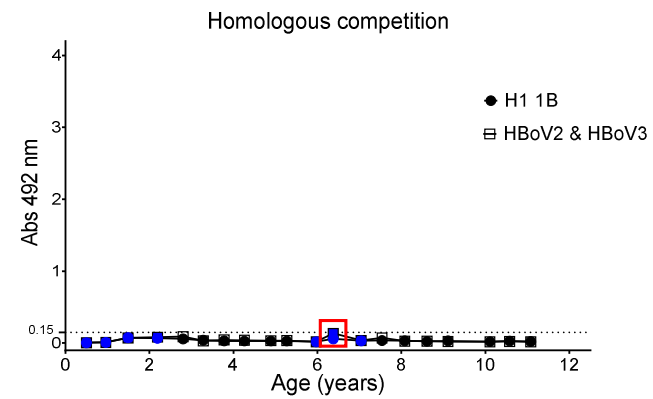

13

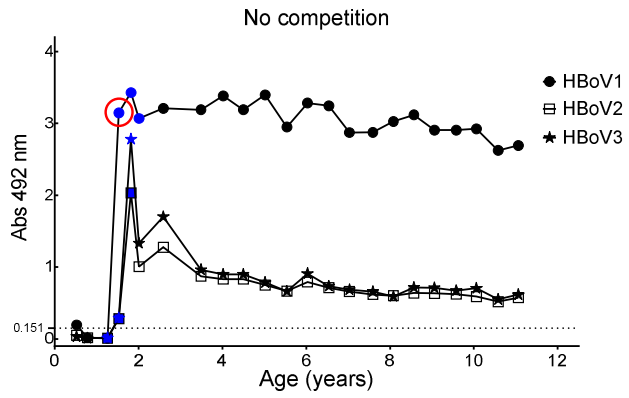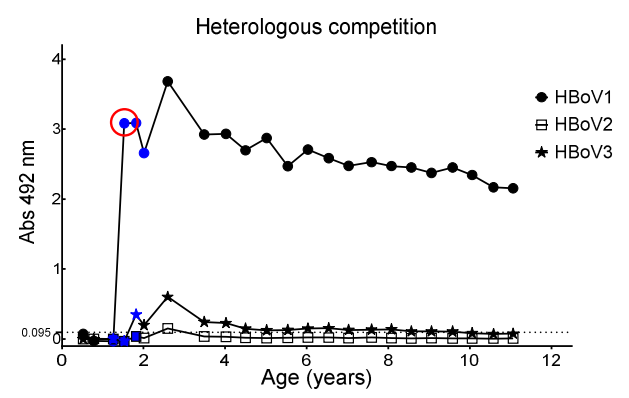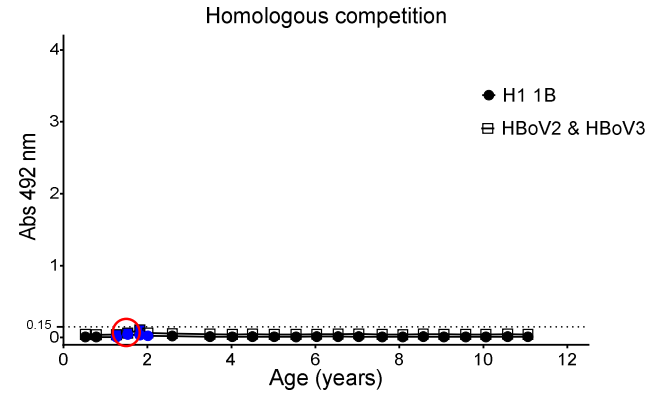

14

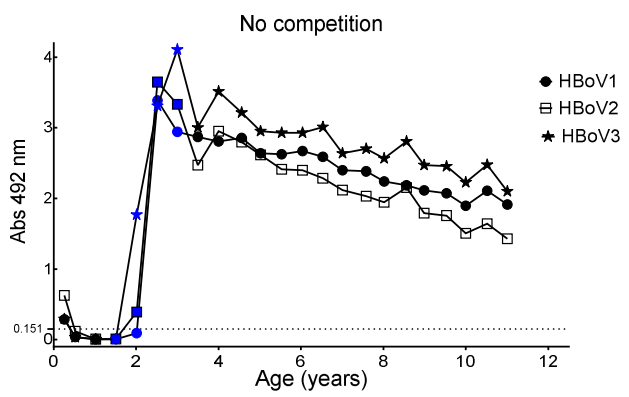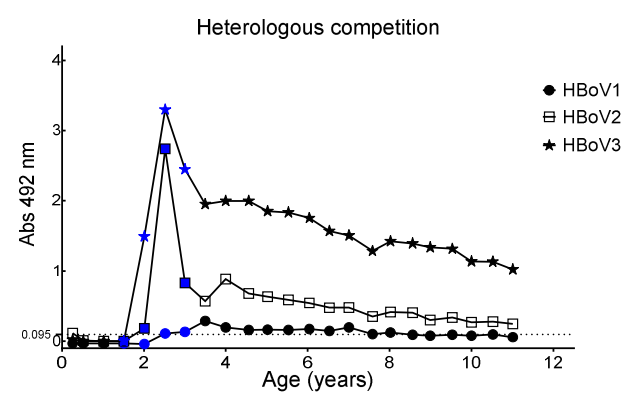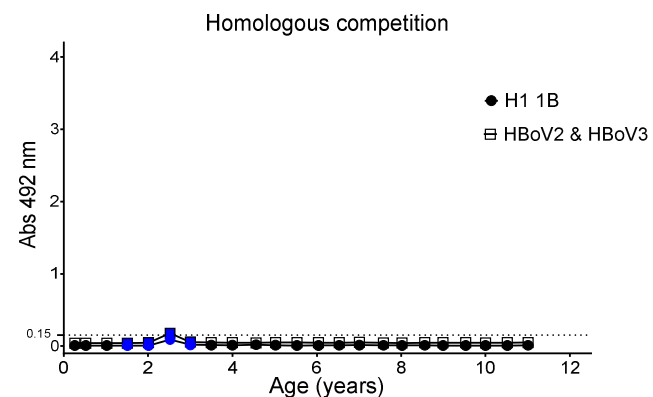

15

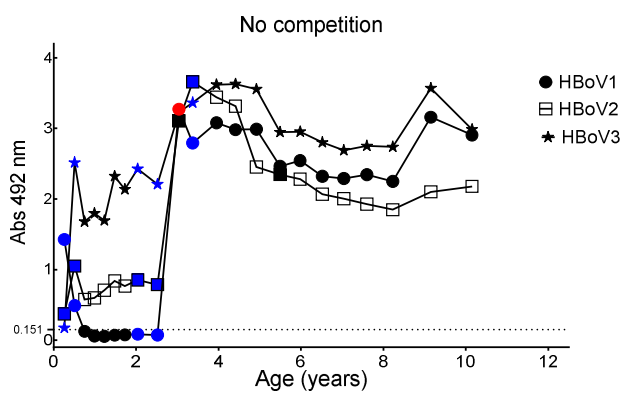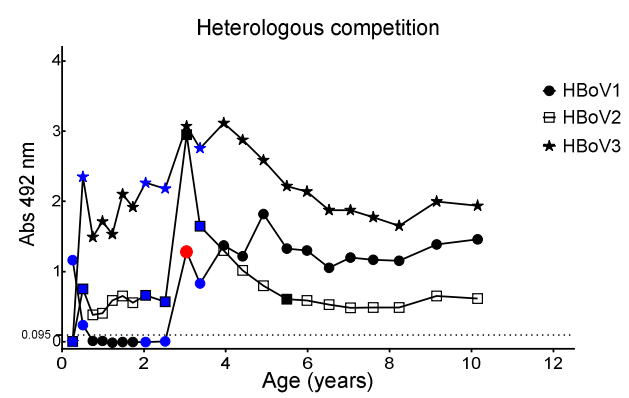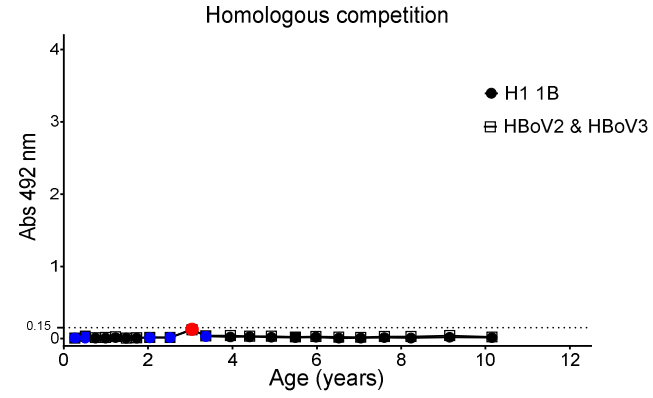

16

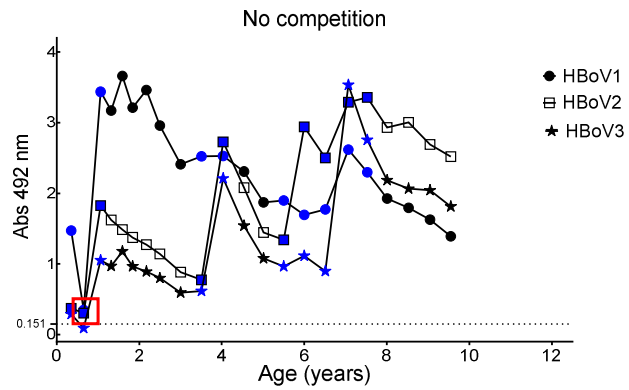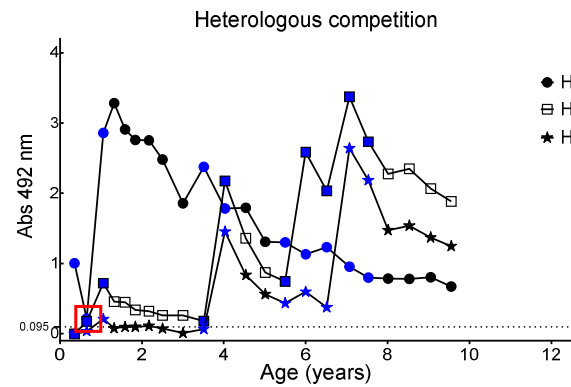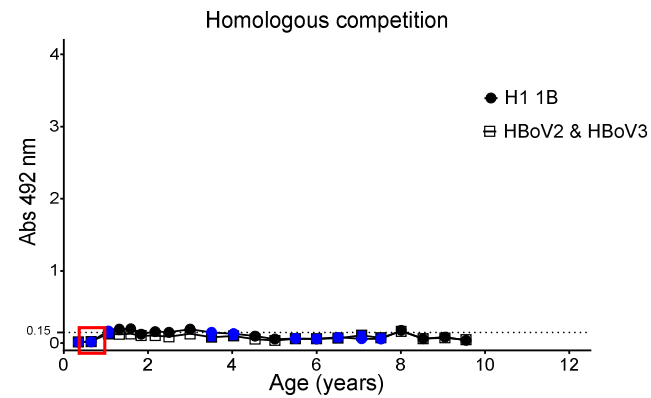

17

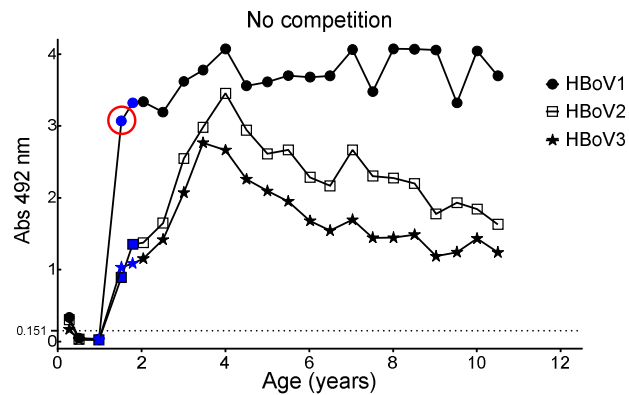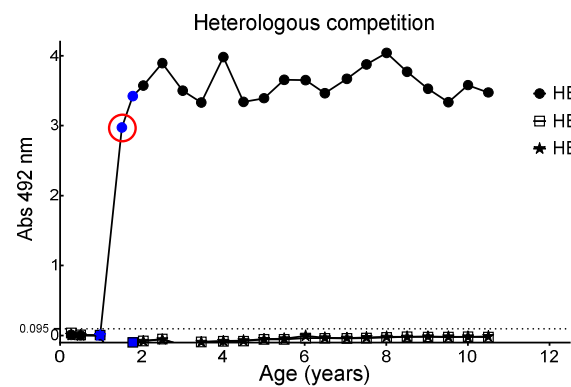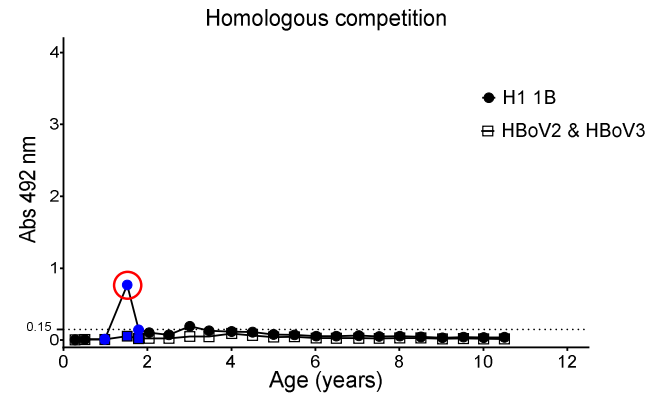

18

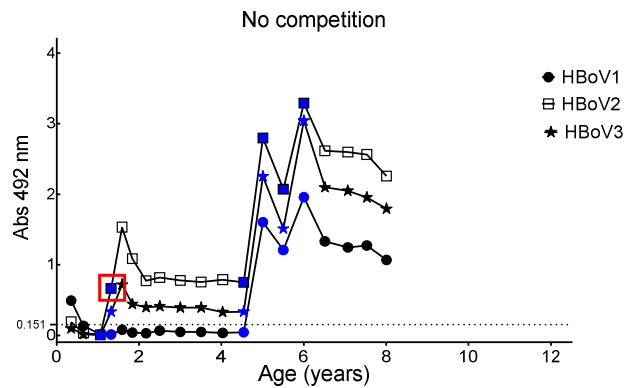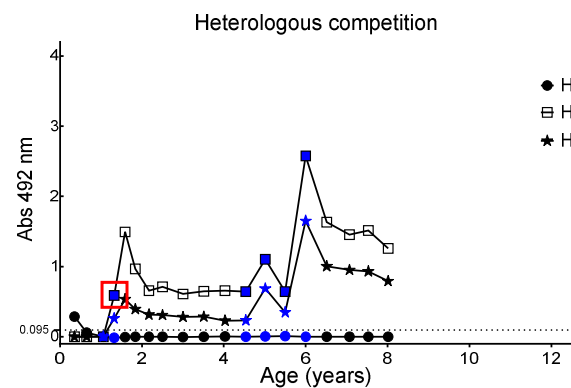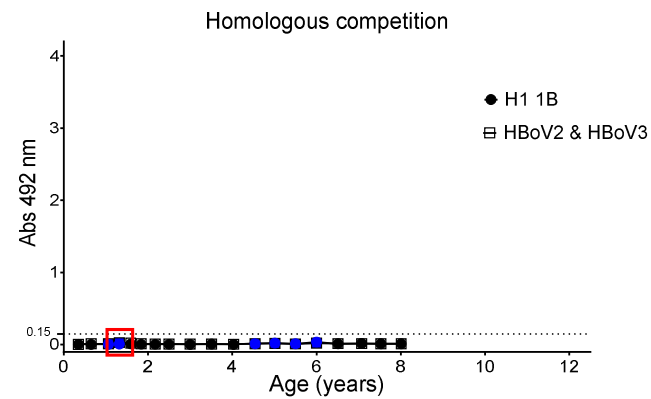

19

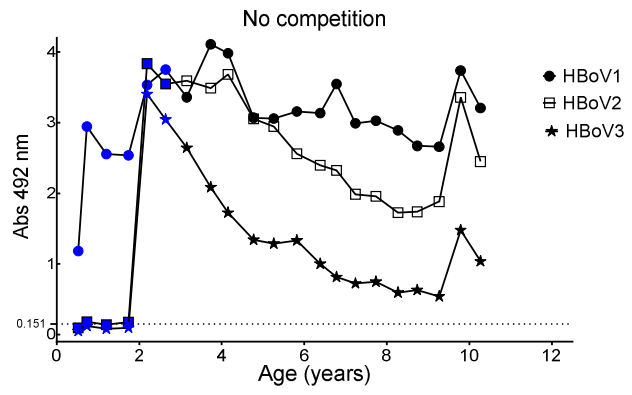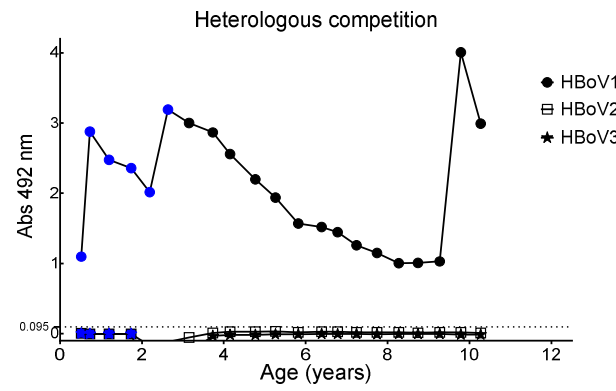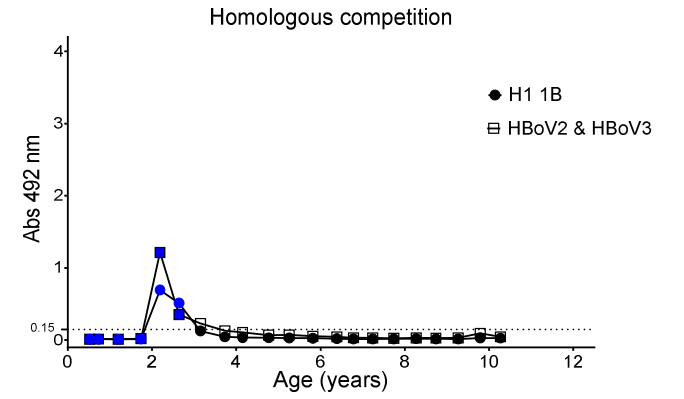

20

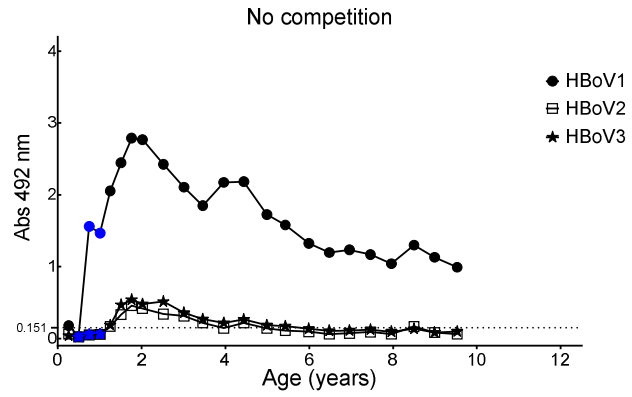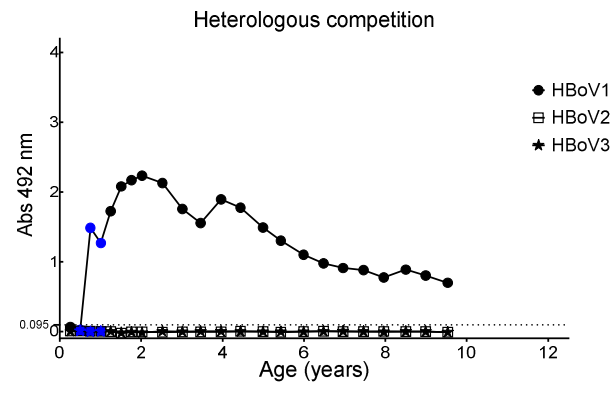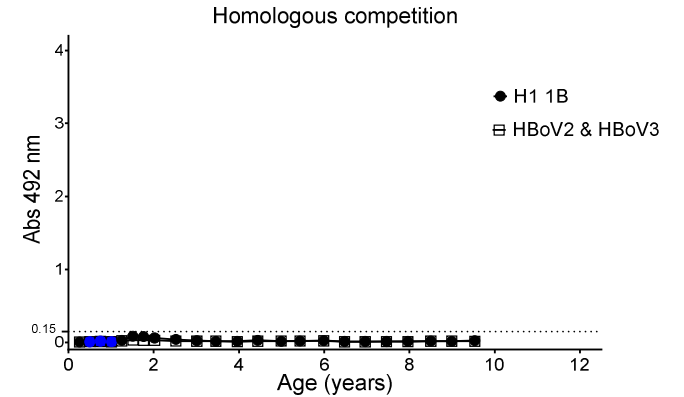

21

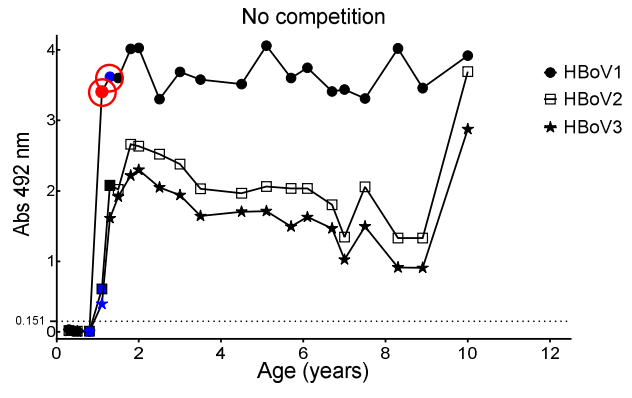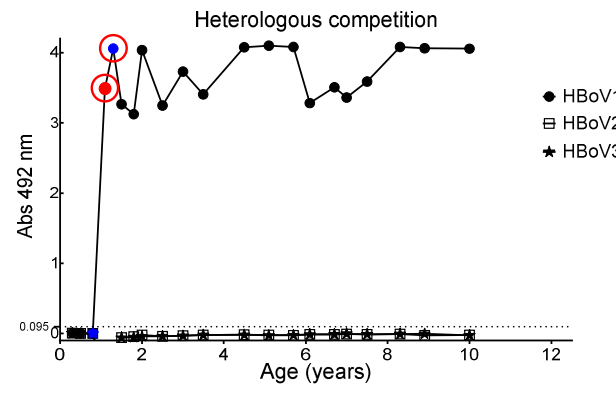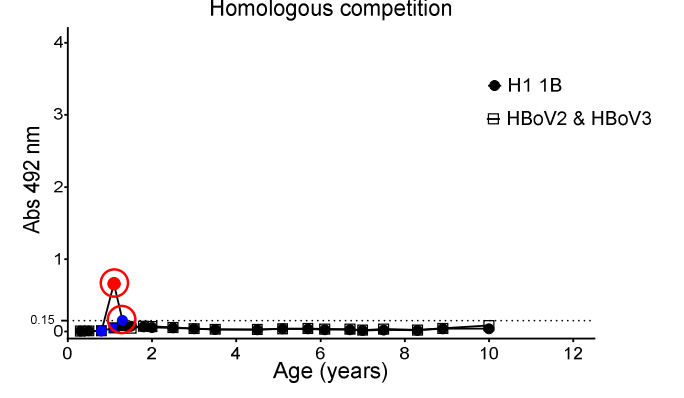



22

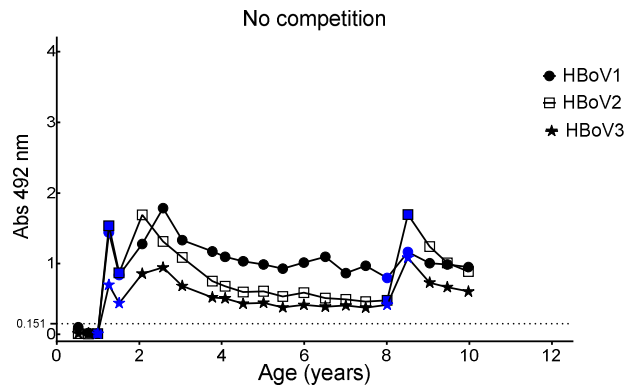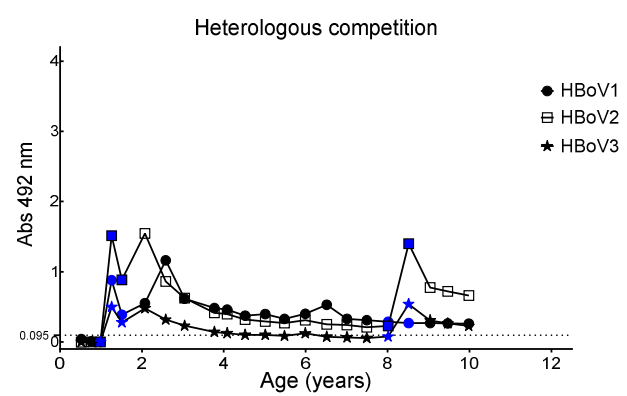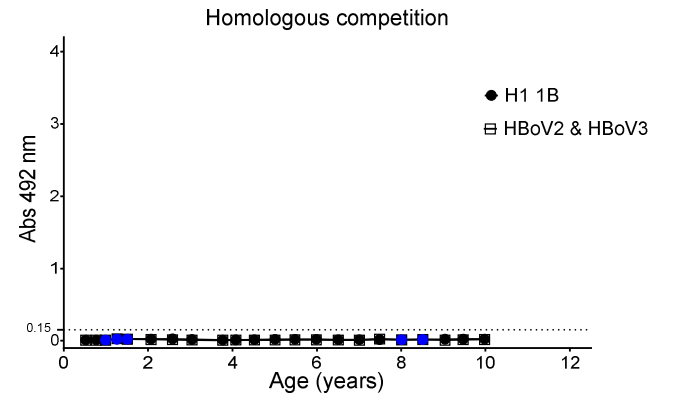

23

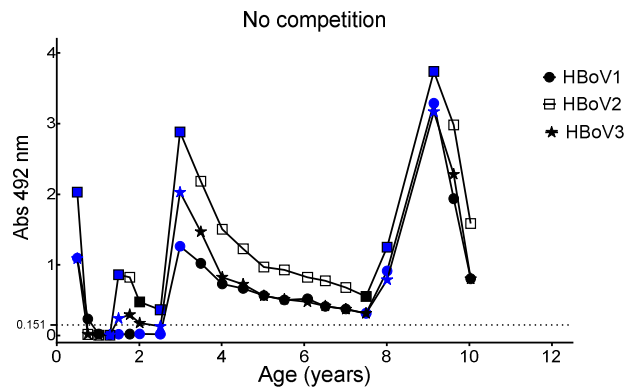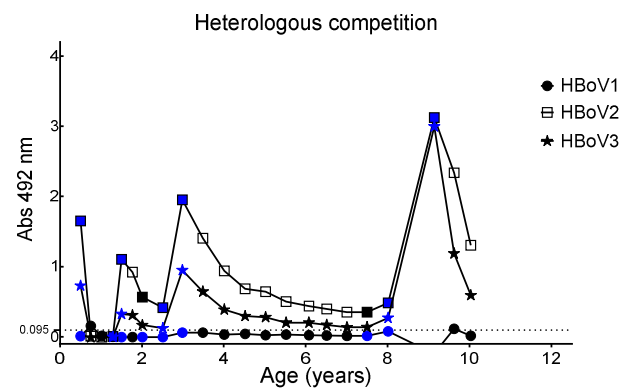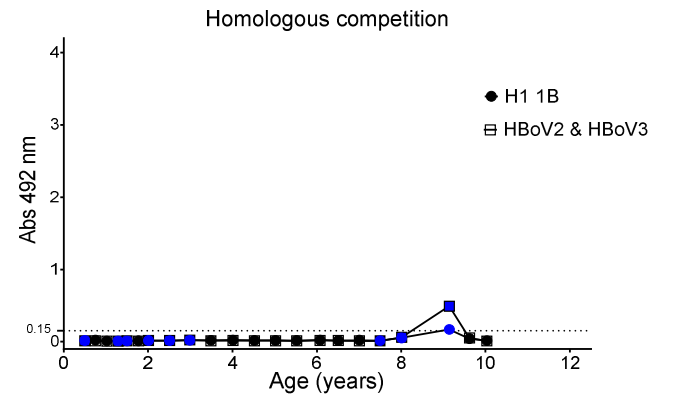

24

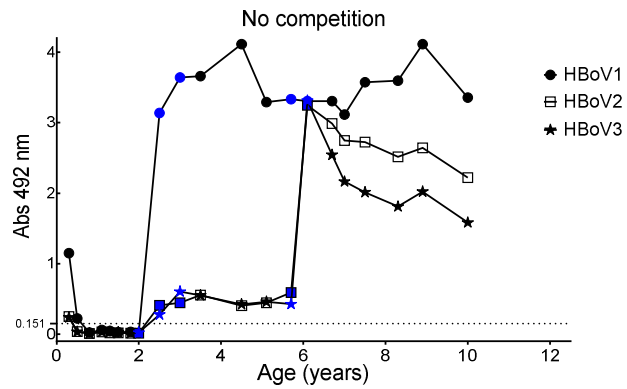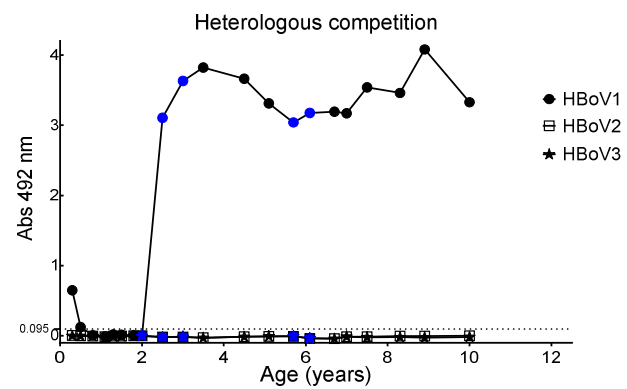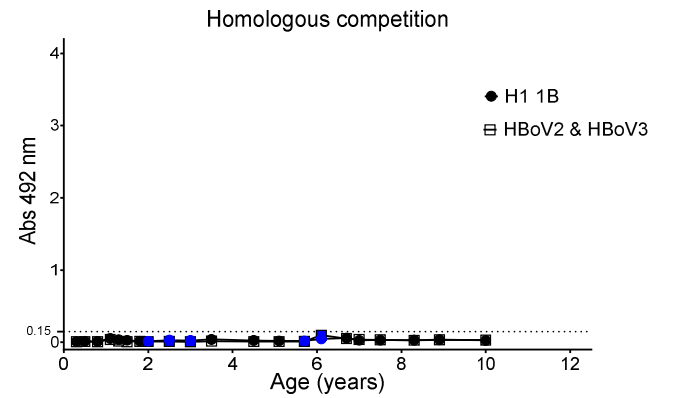

25

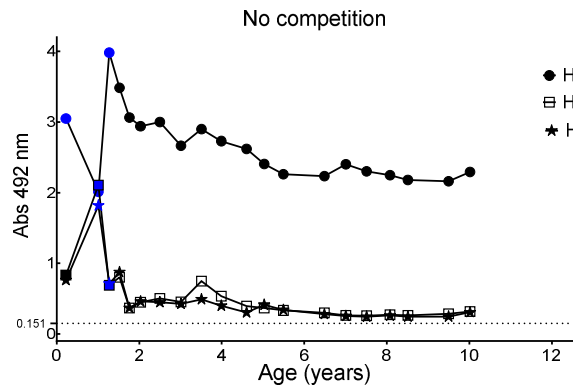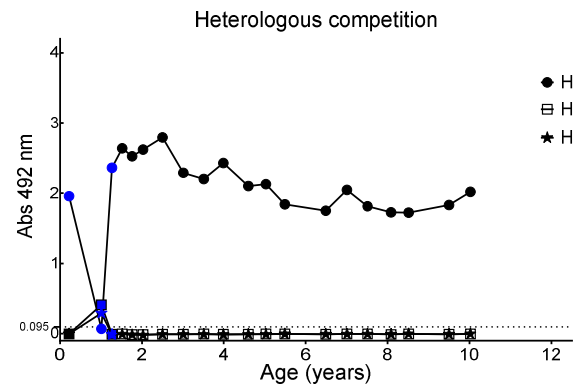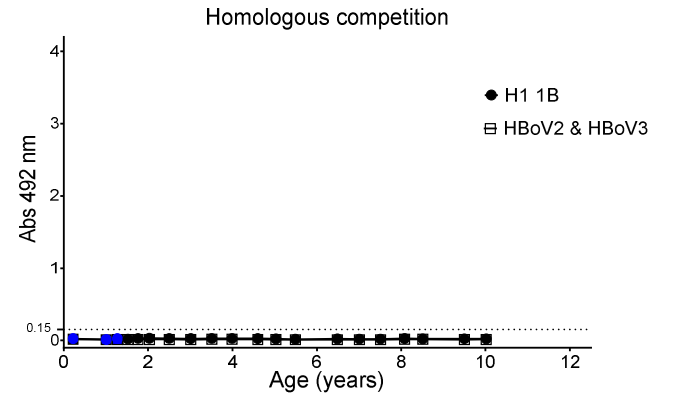

26

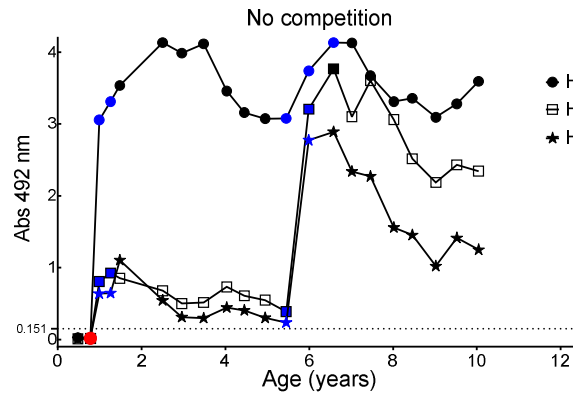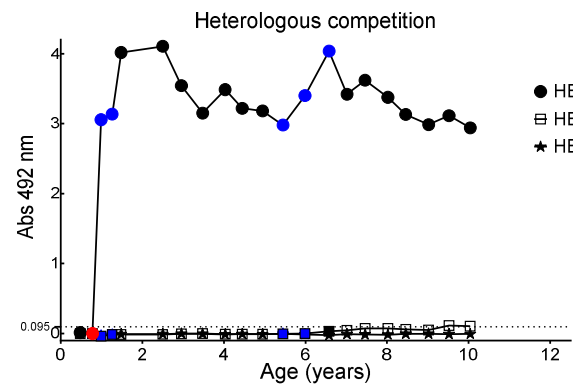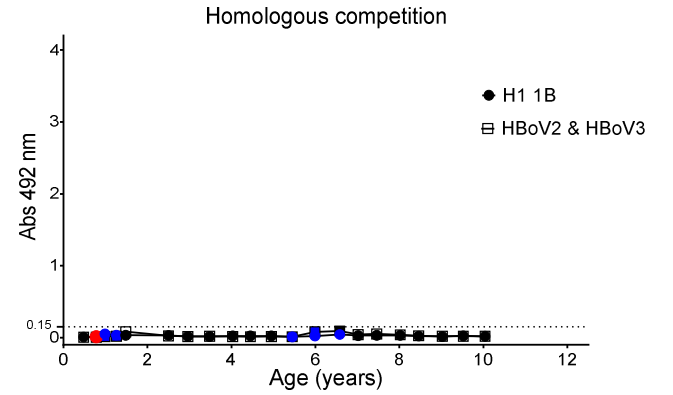

27

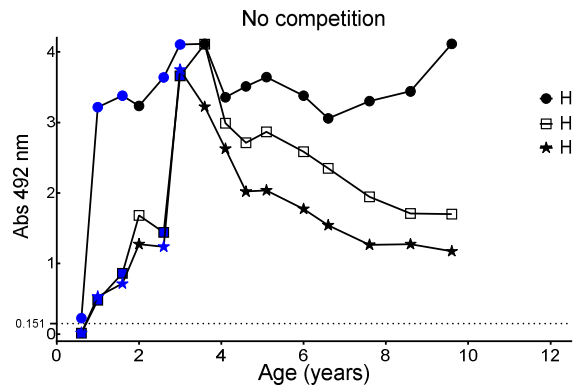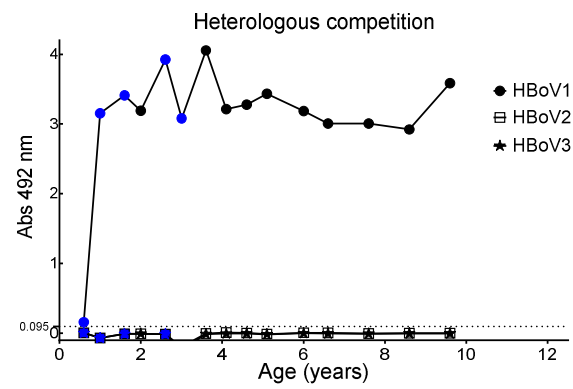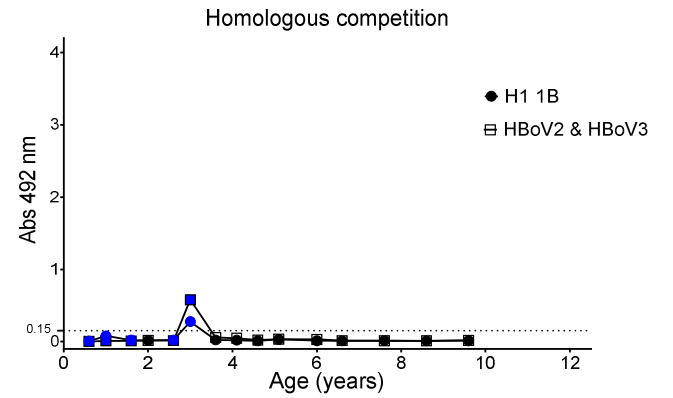

28

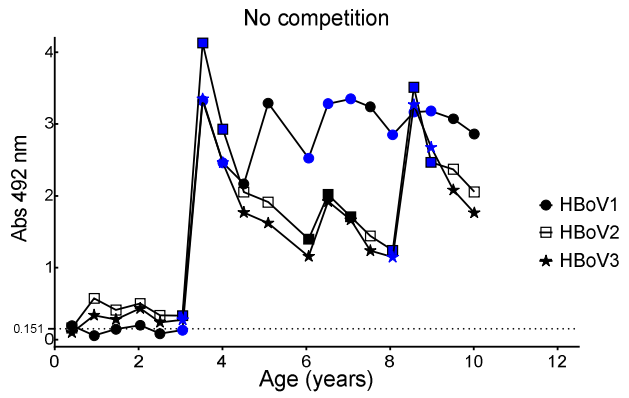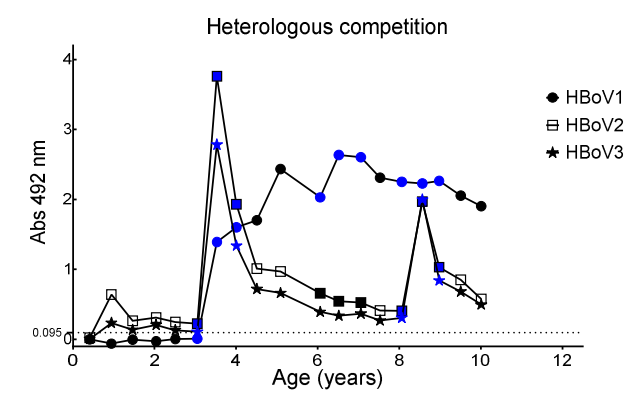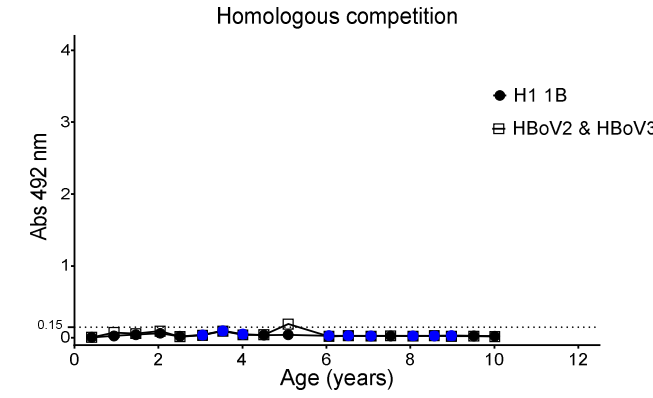

29

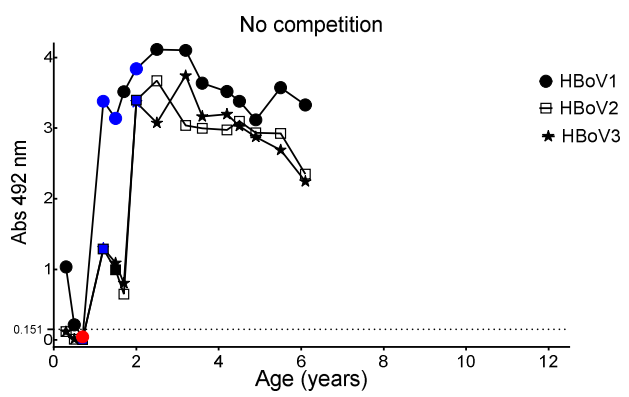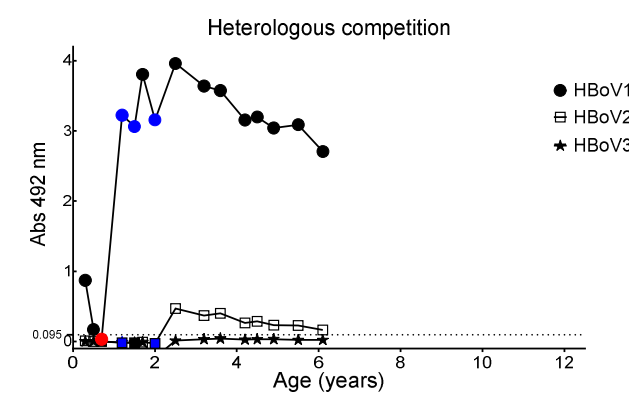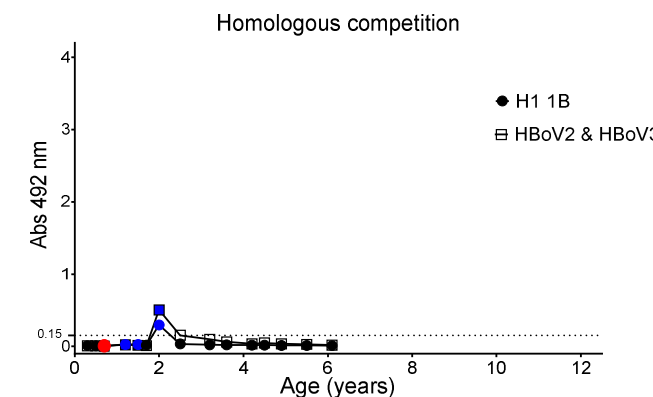

30

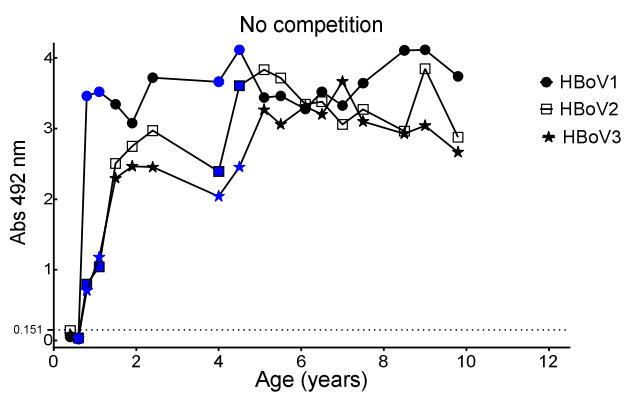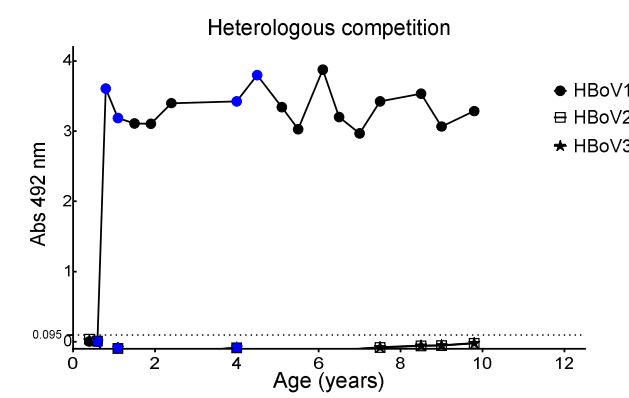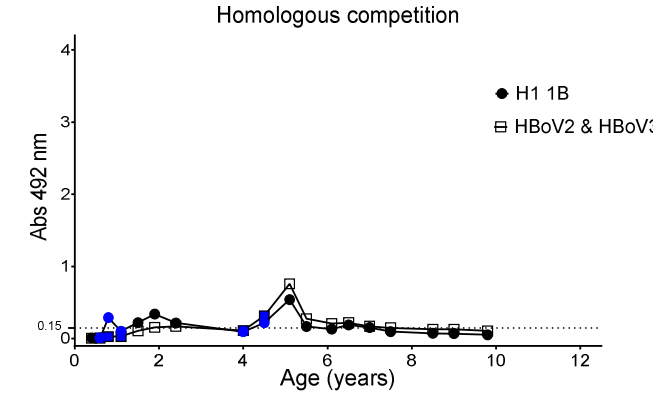

31

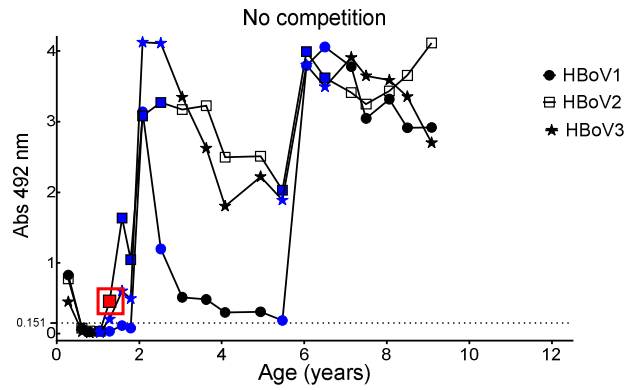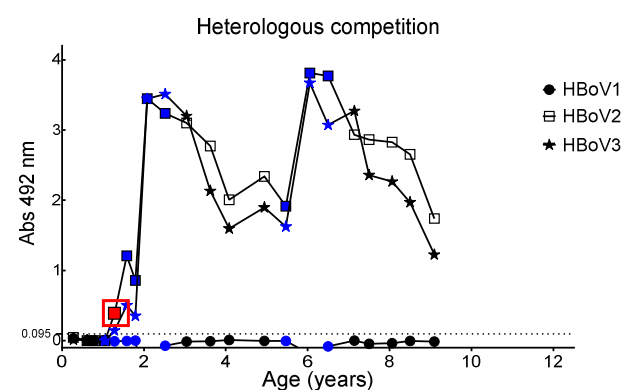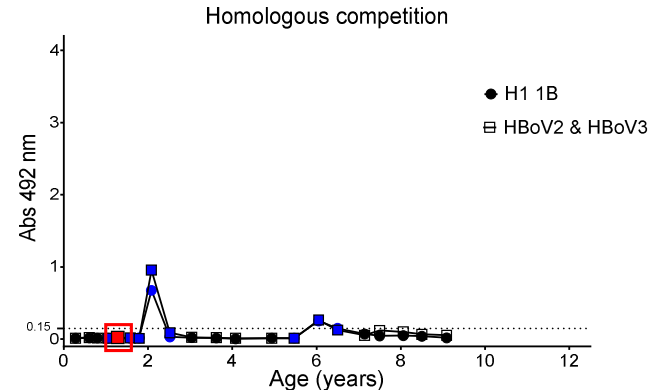

32

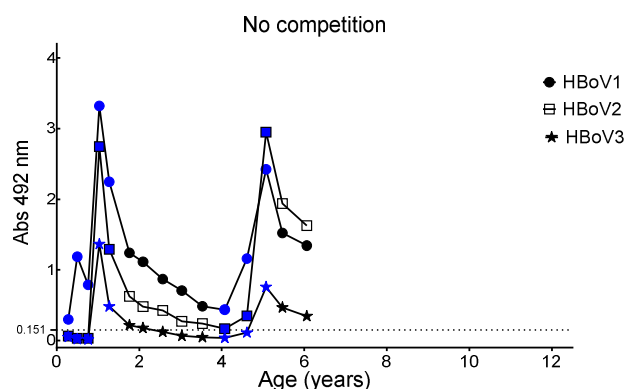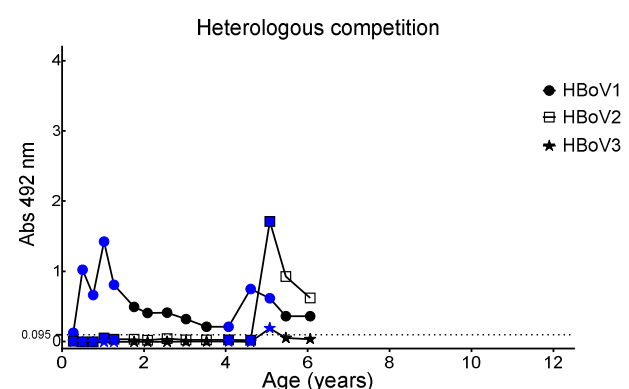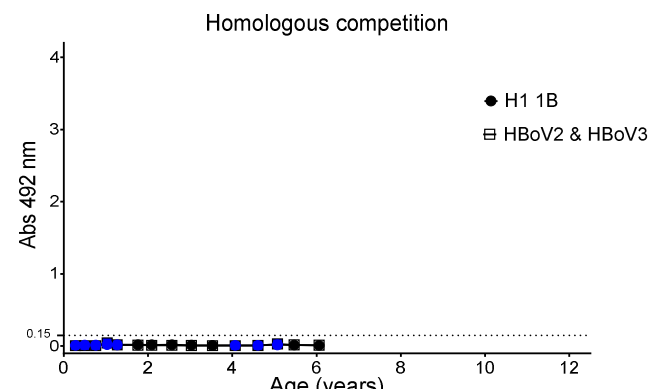

33

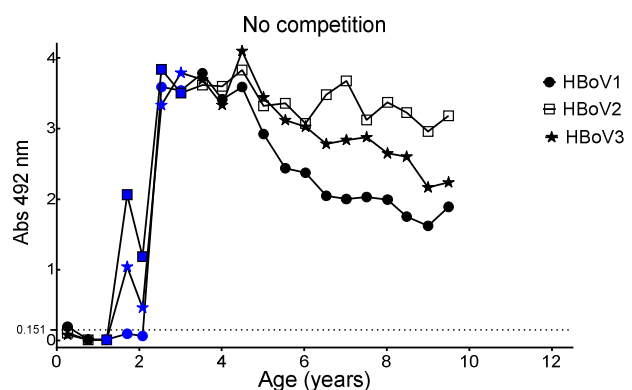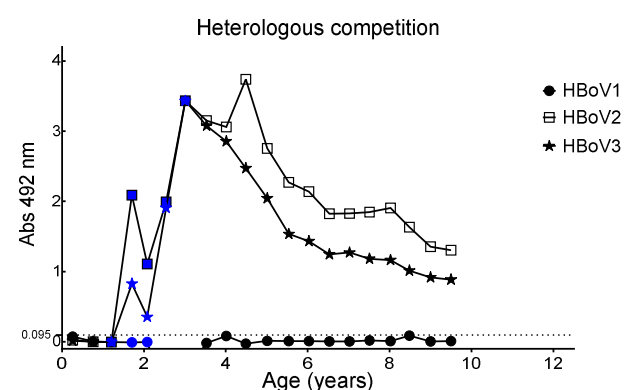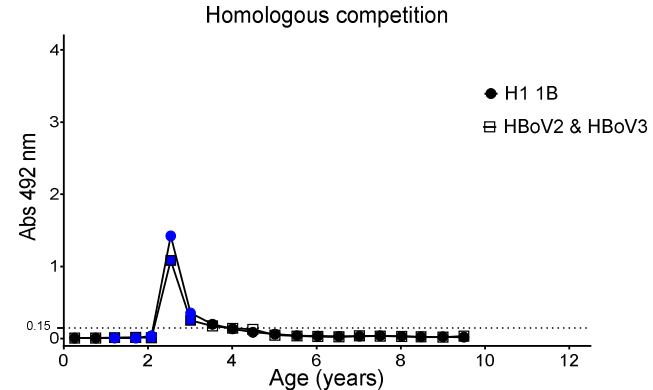

34

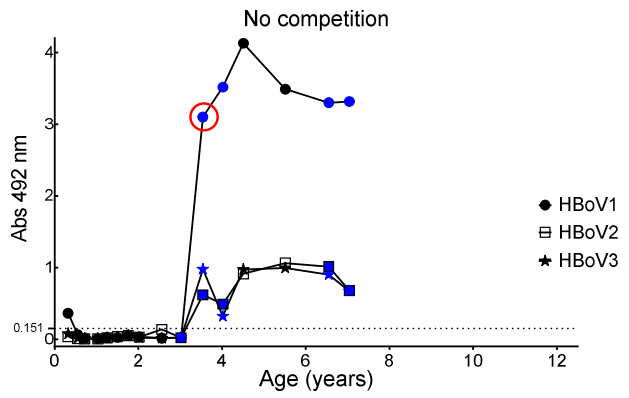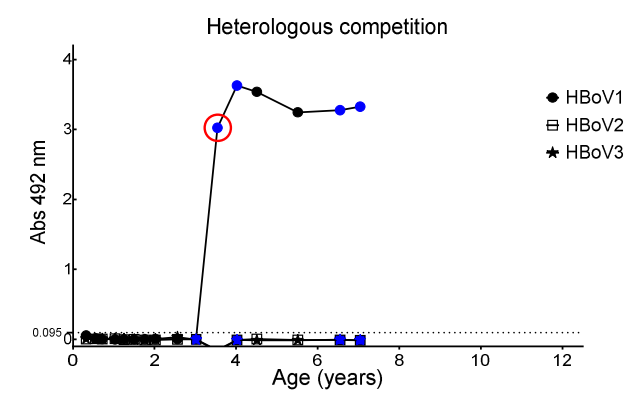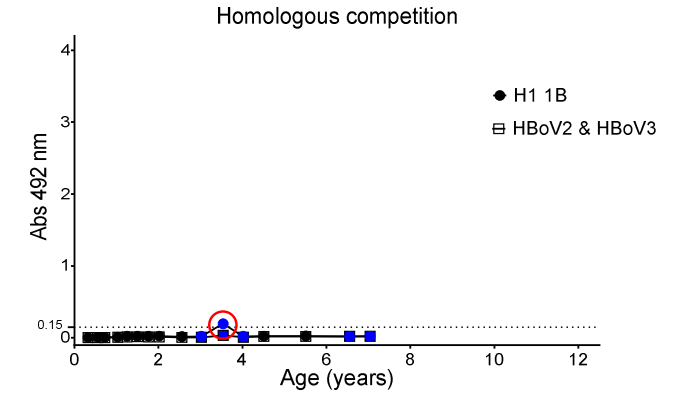

35

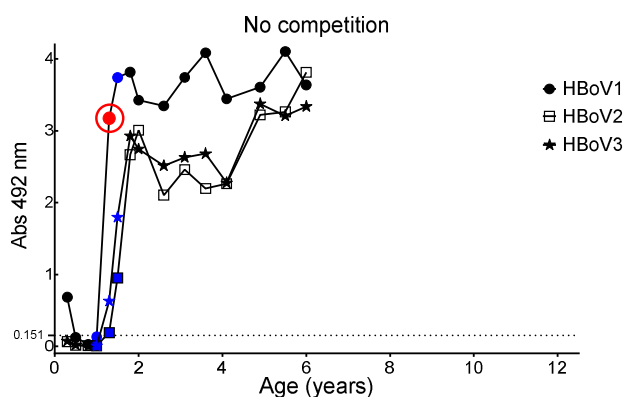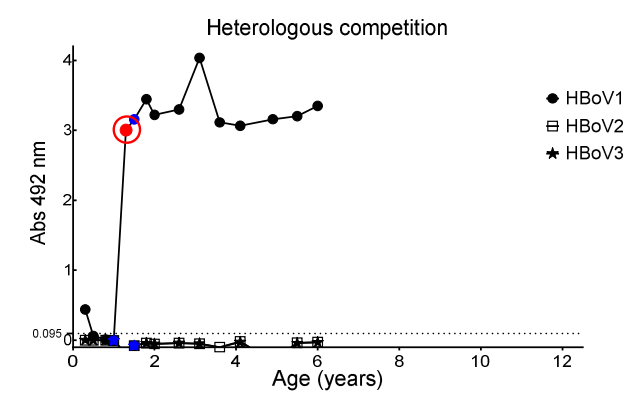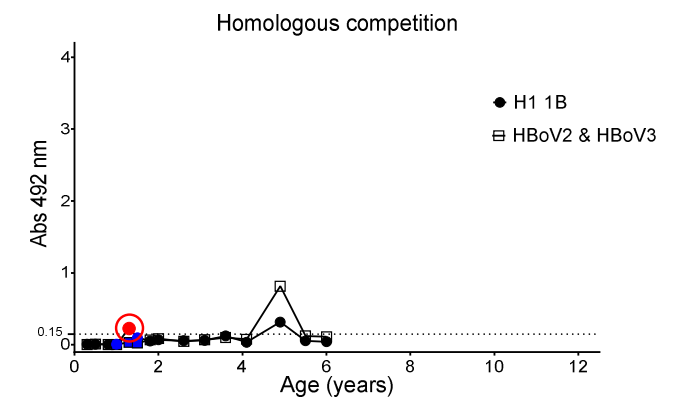

36

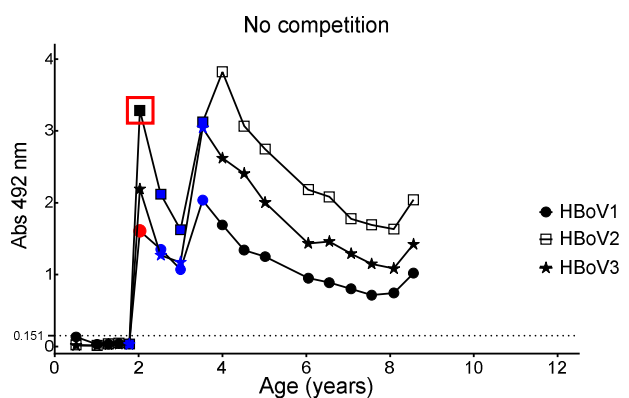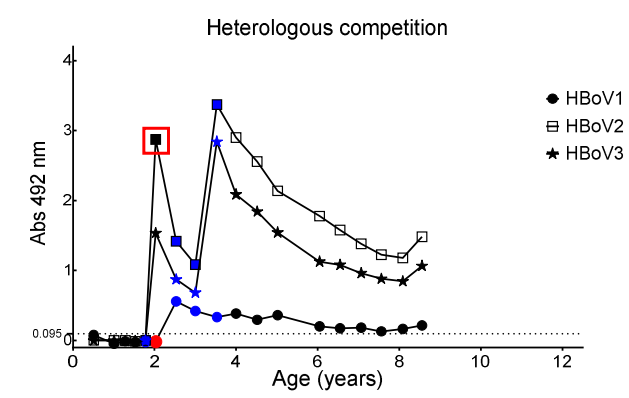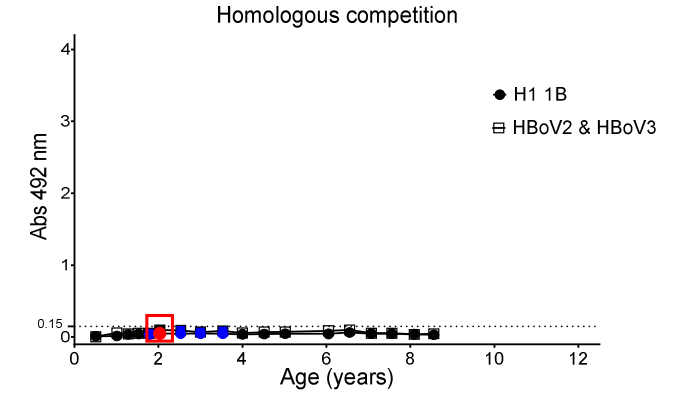

37

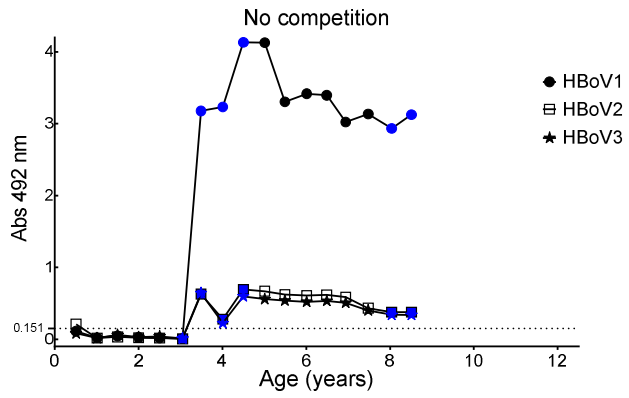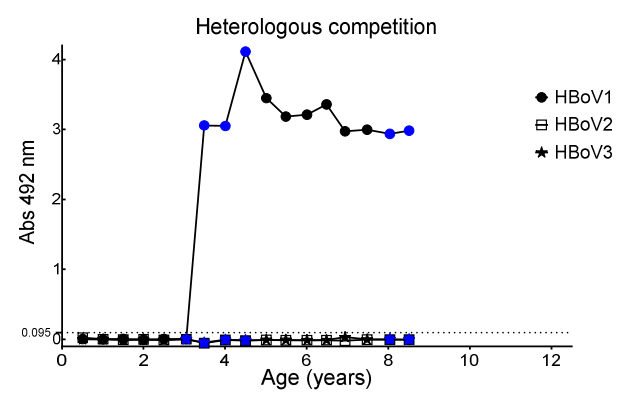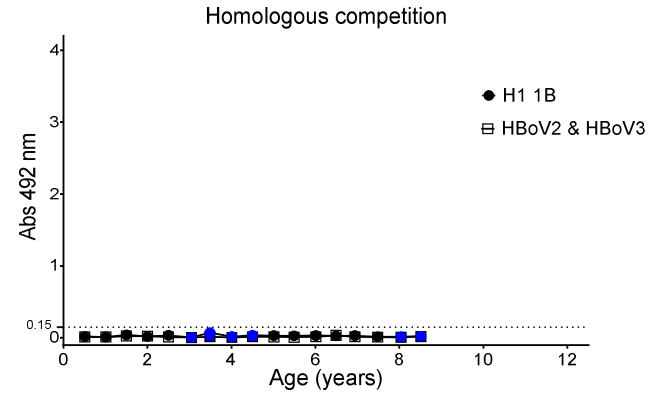

38

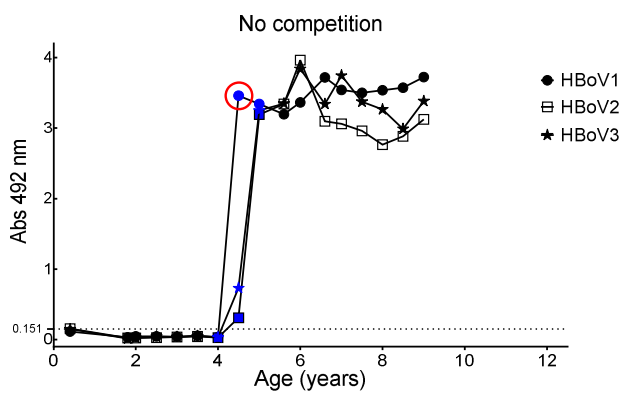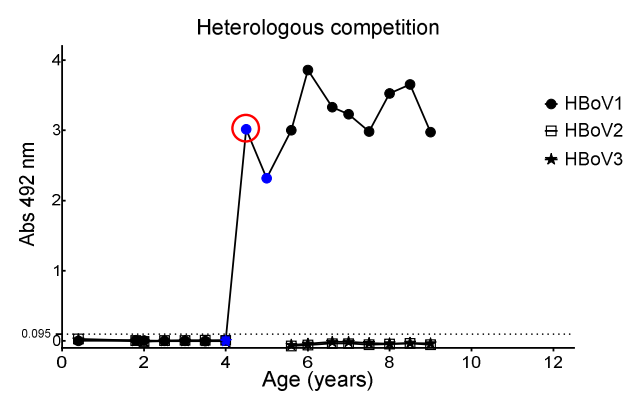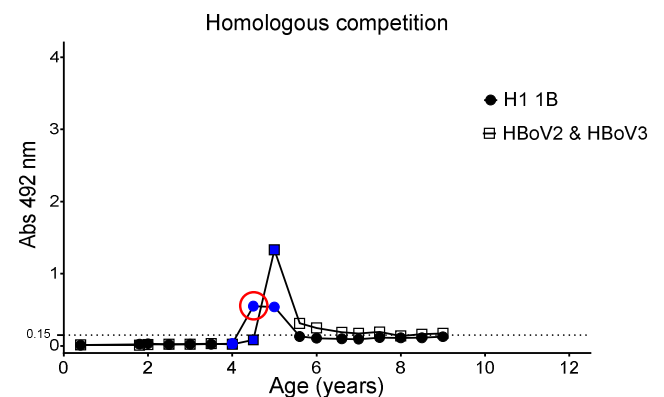

39

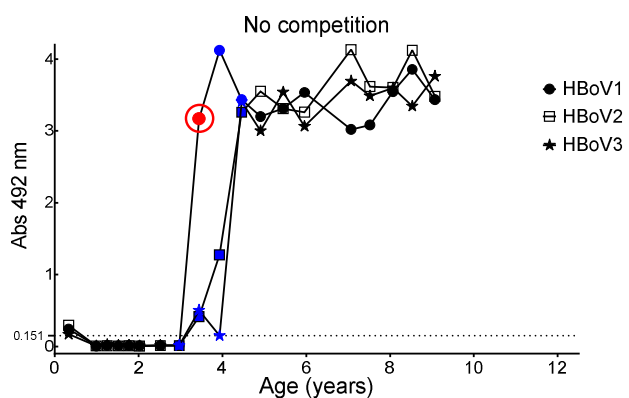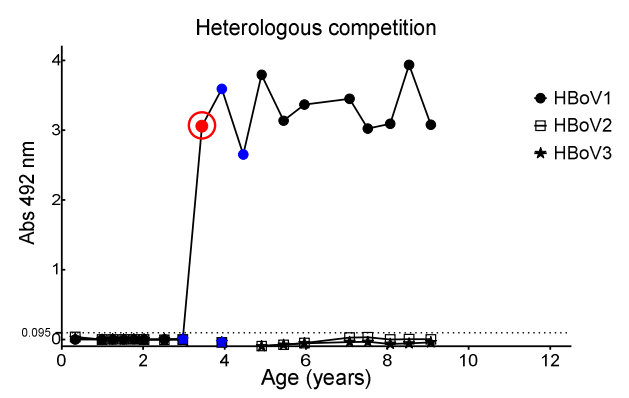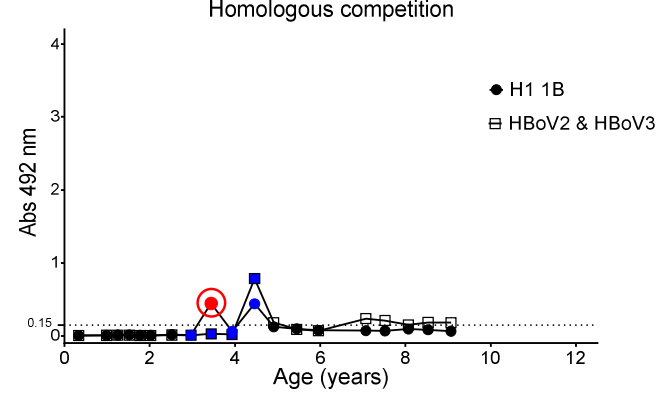

40

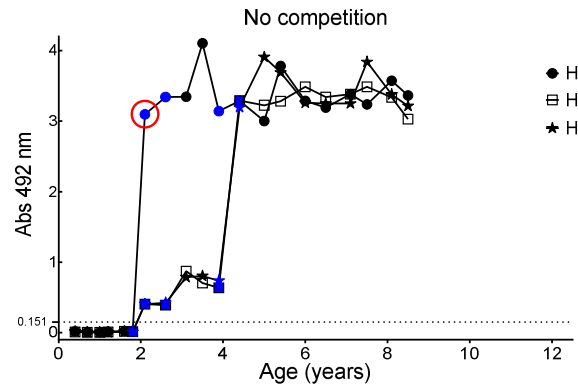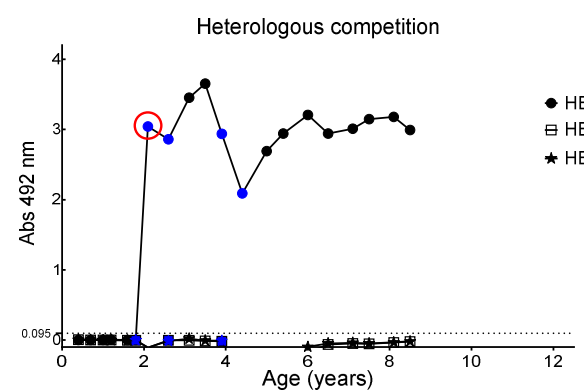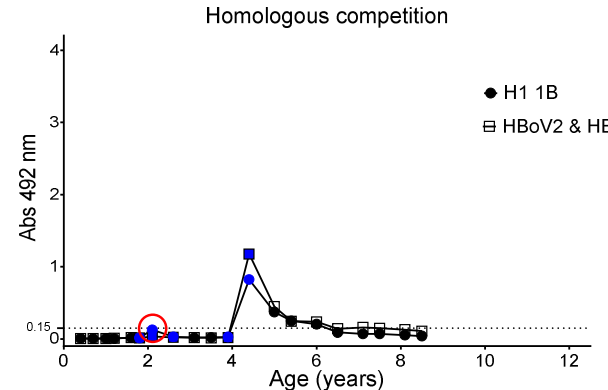

41

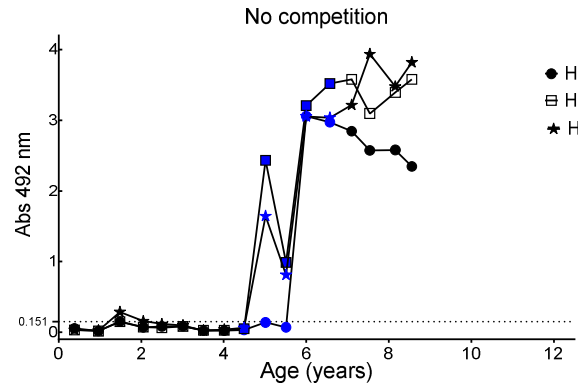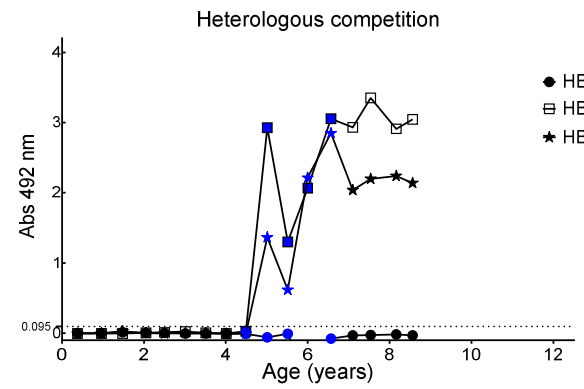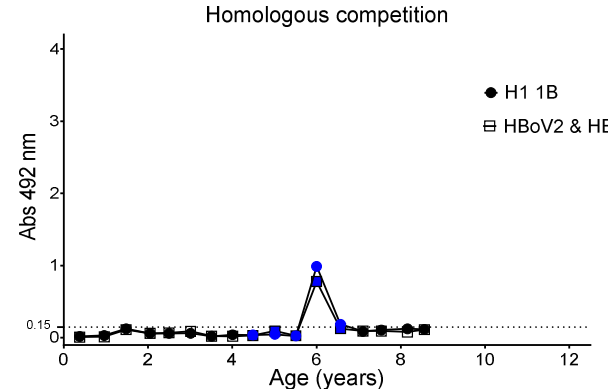

42

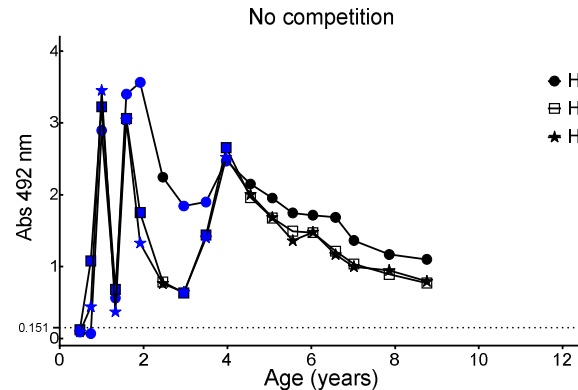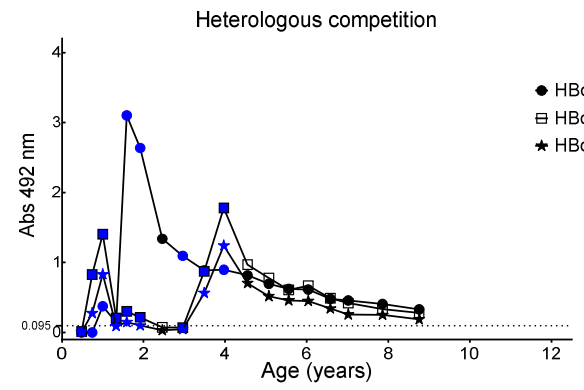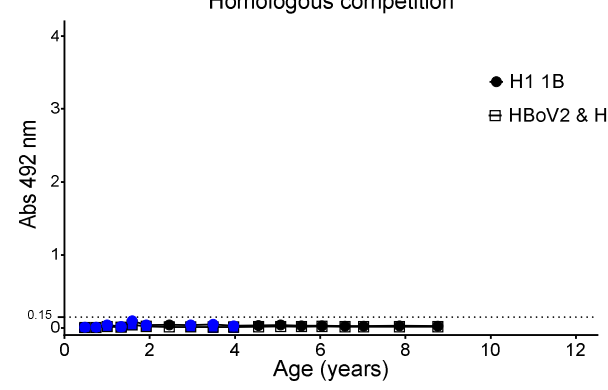

43

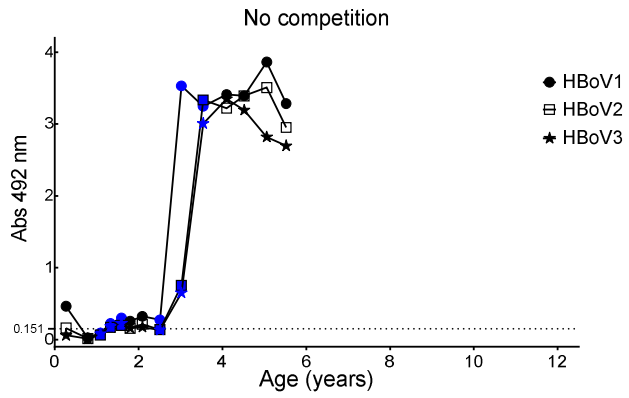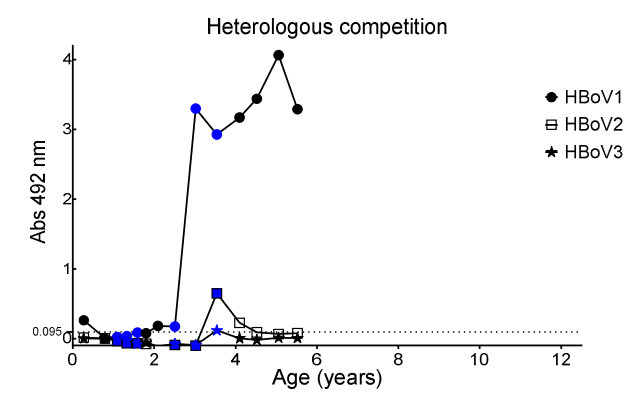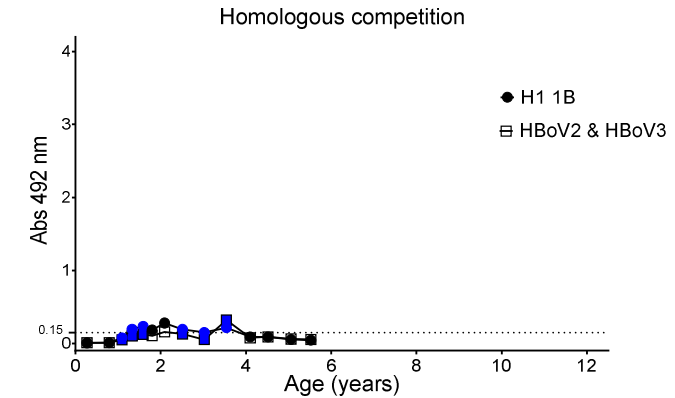

44

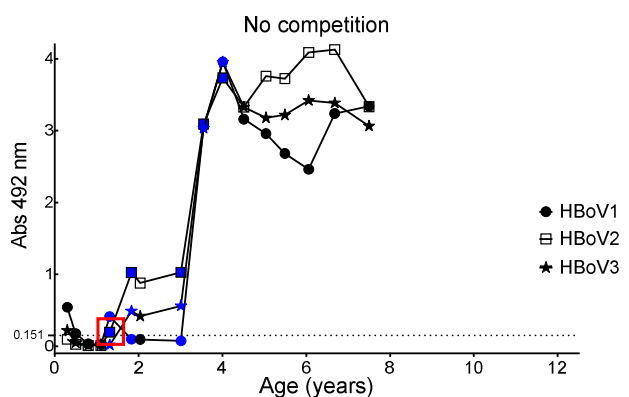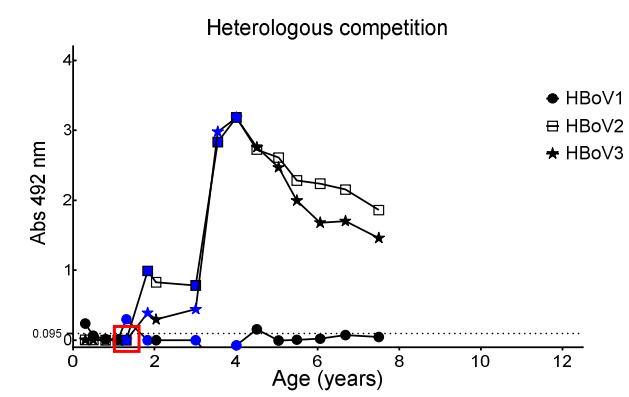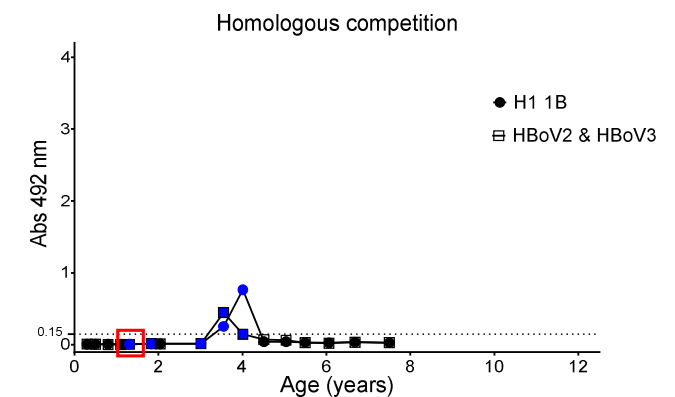

45

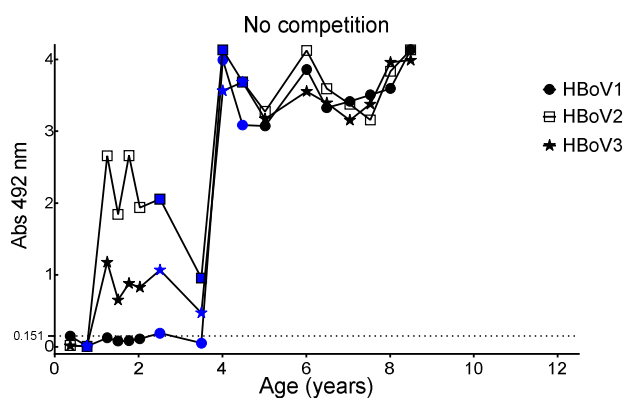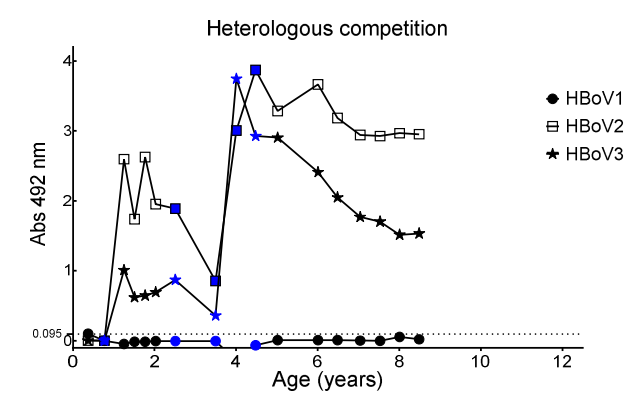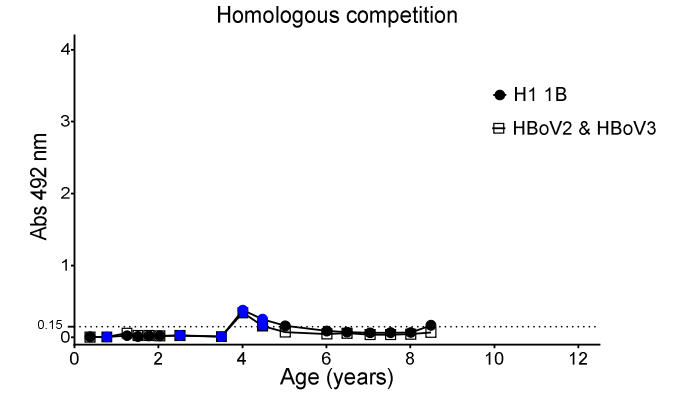



46

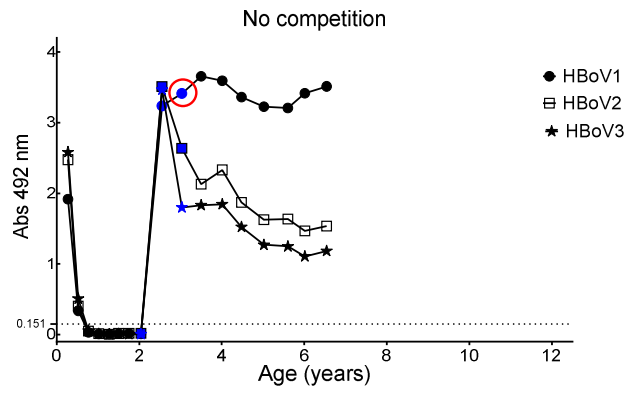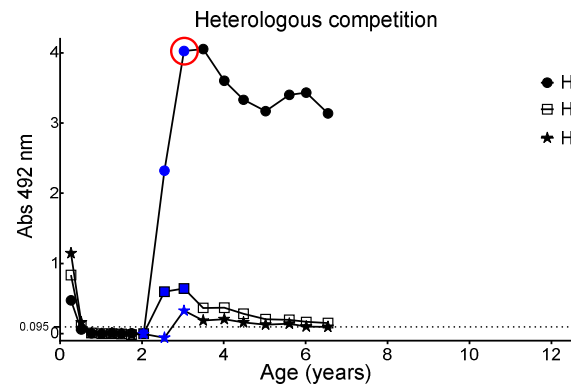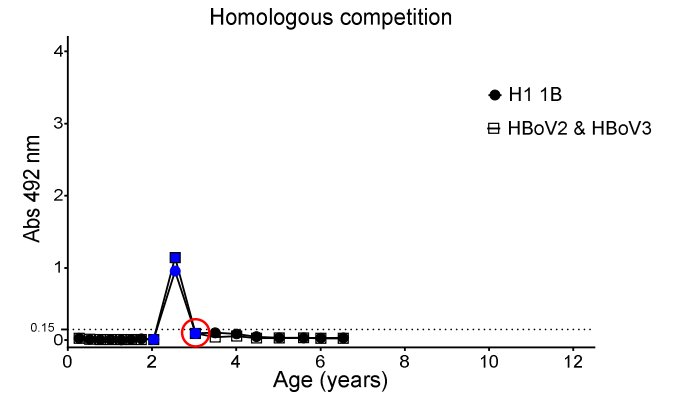

47

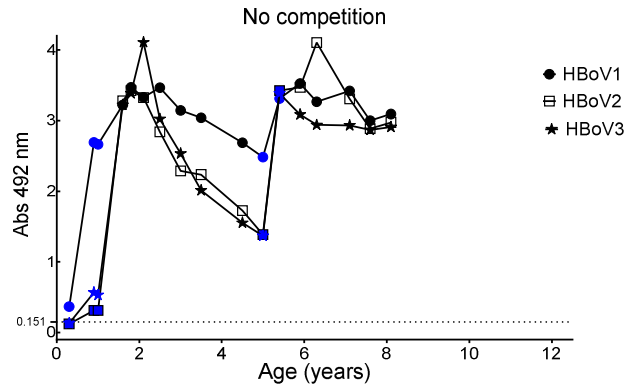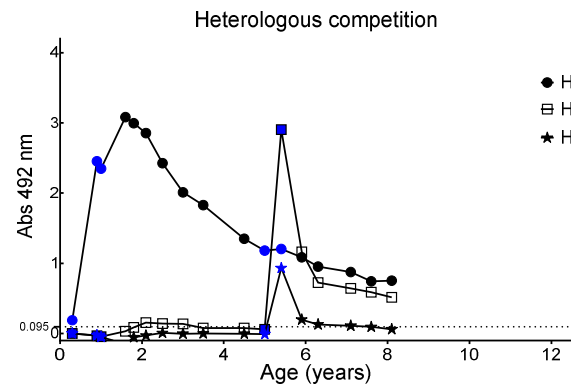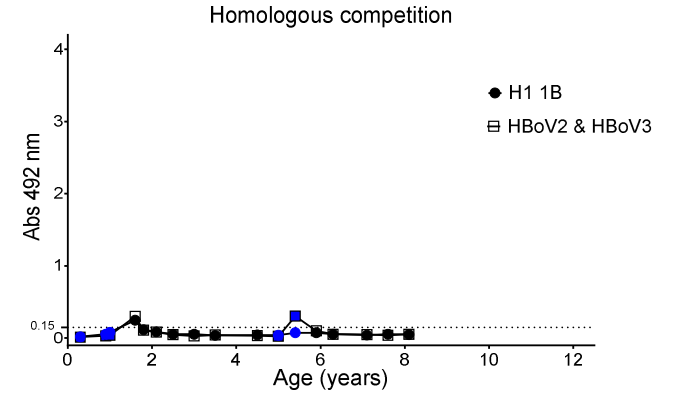

48

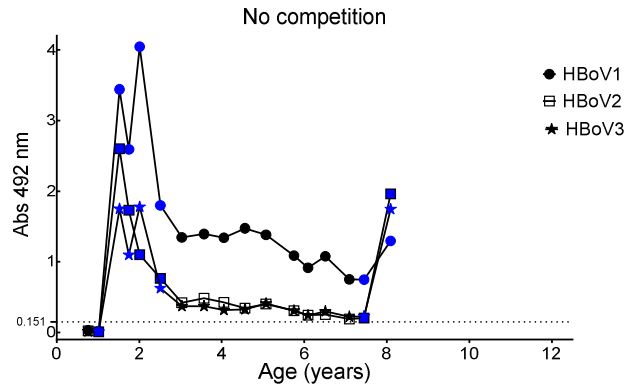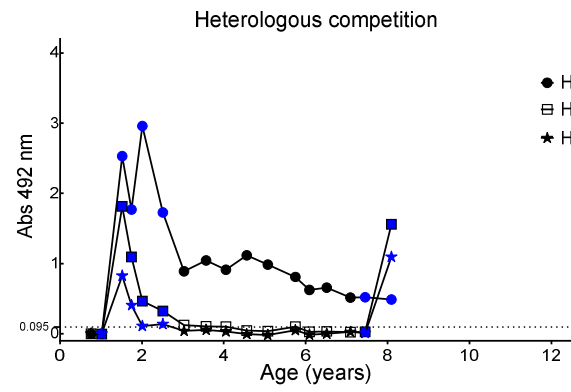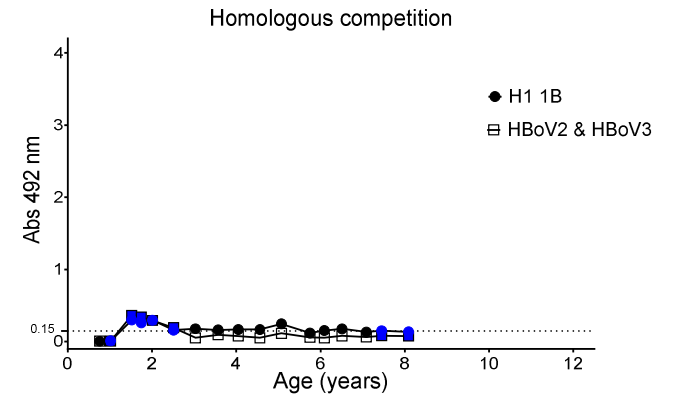

49

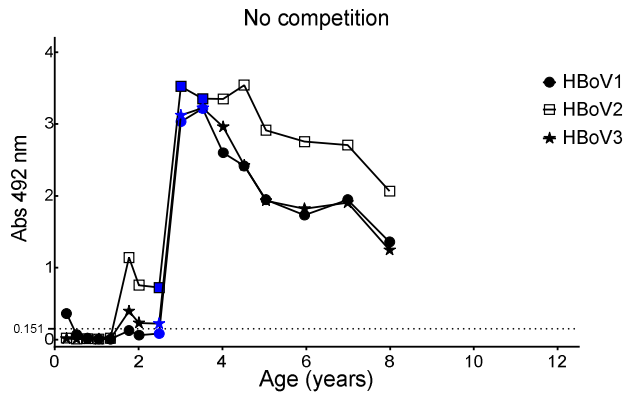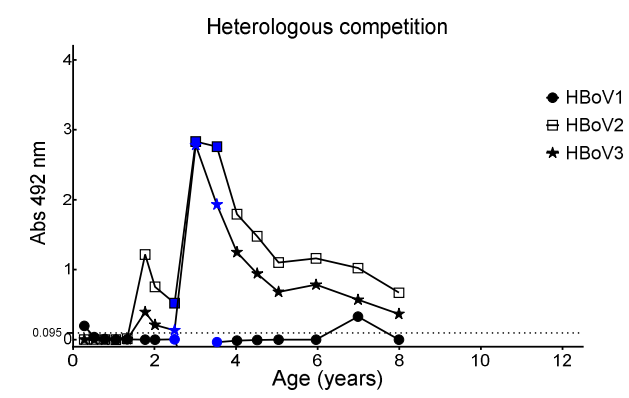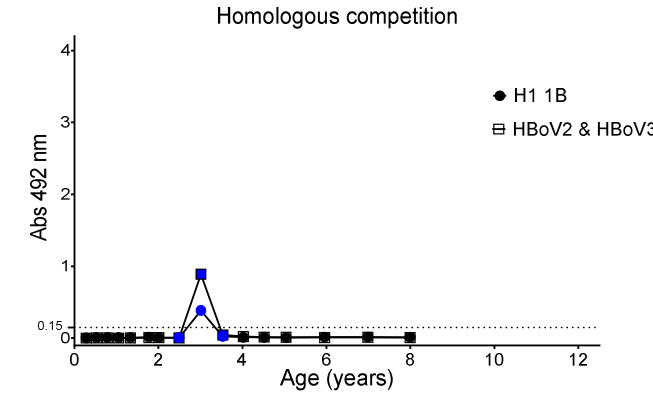

50

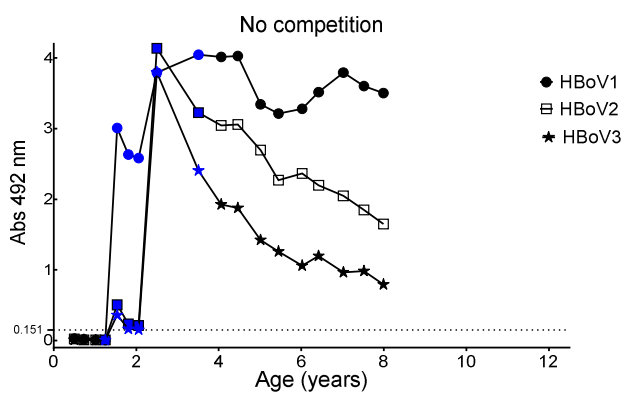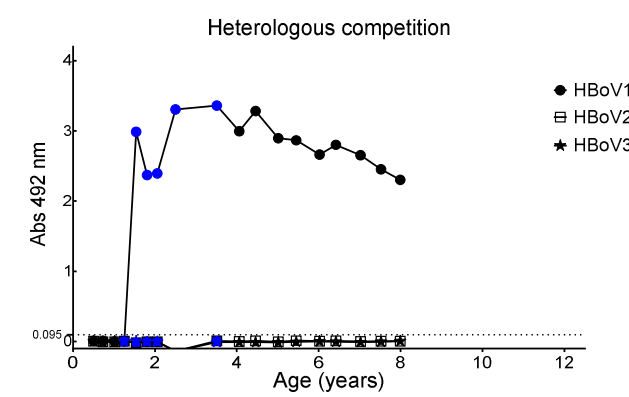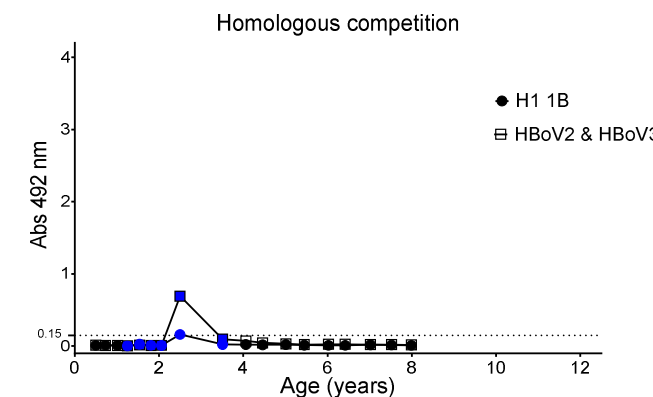

51

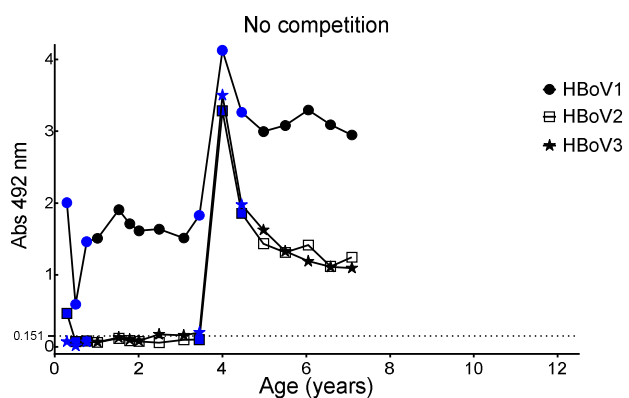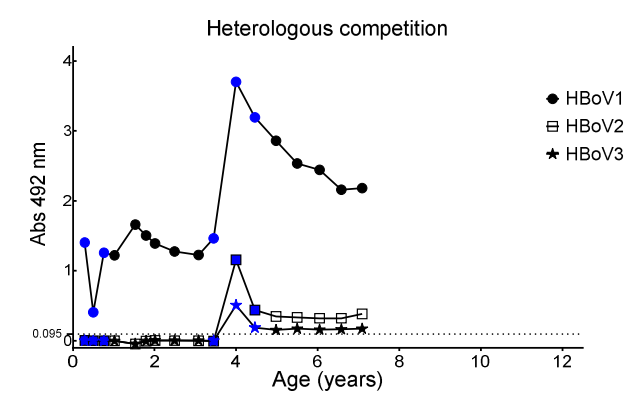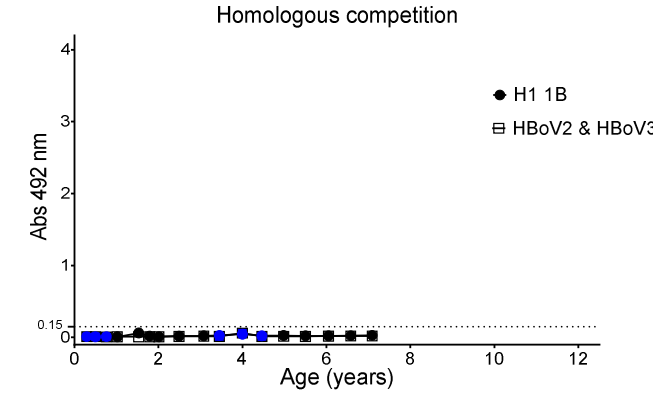

52

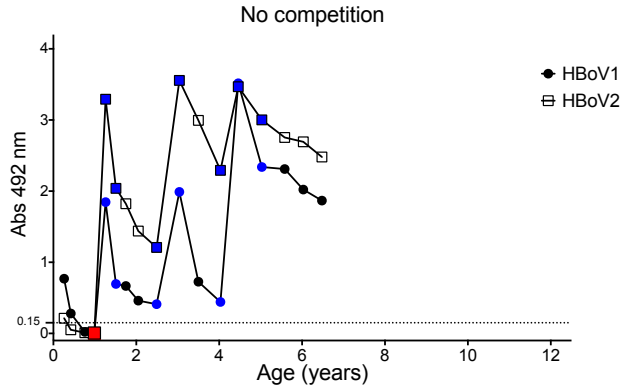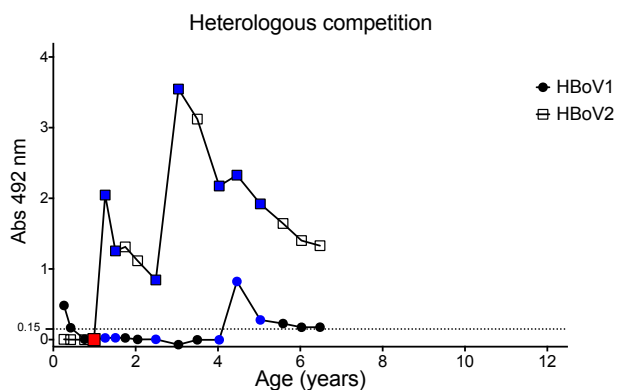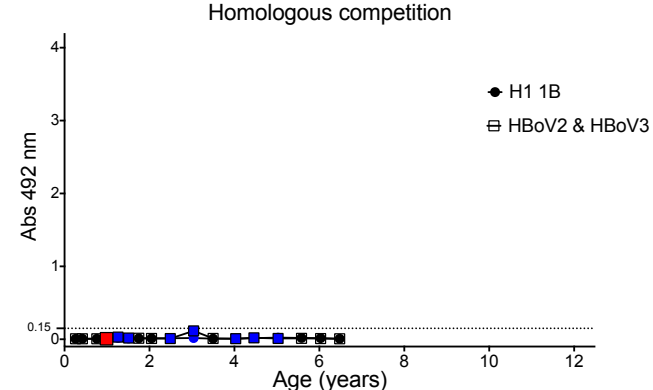

53

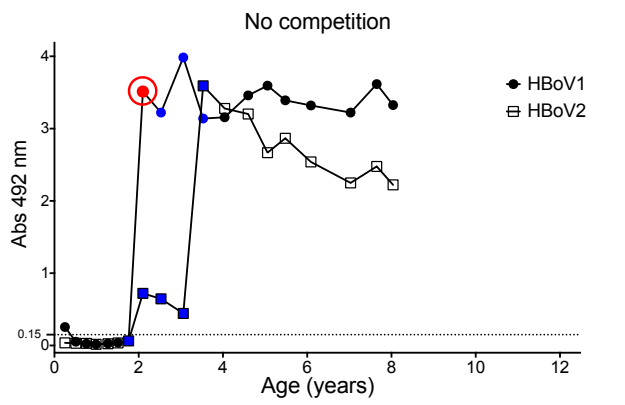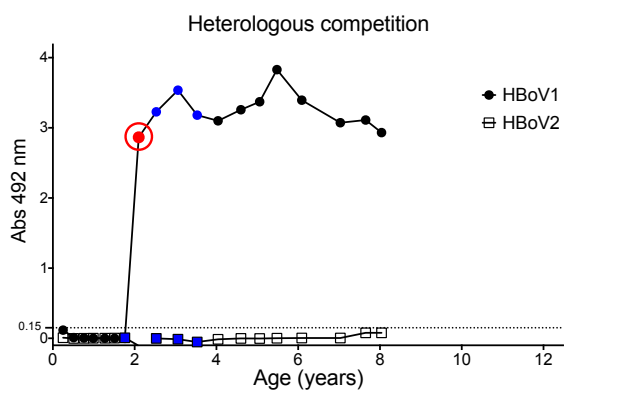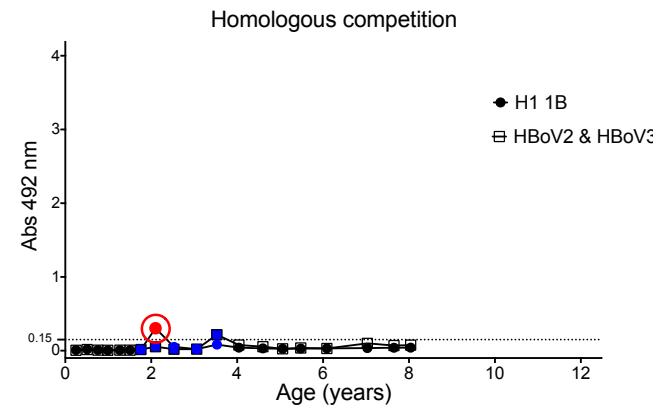

54

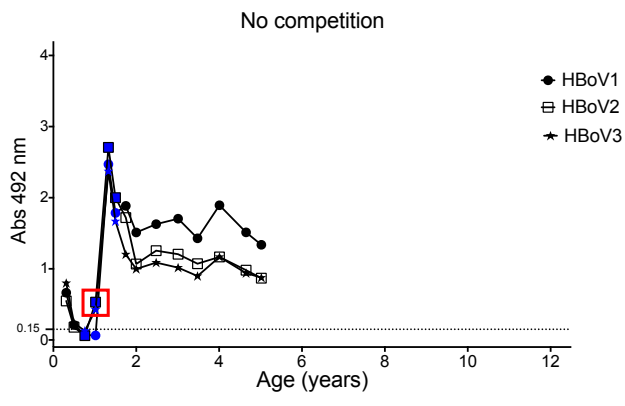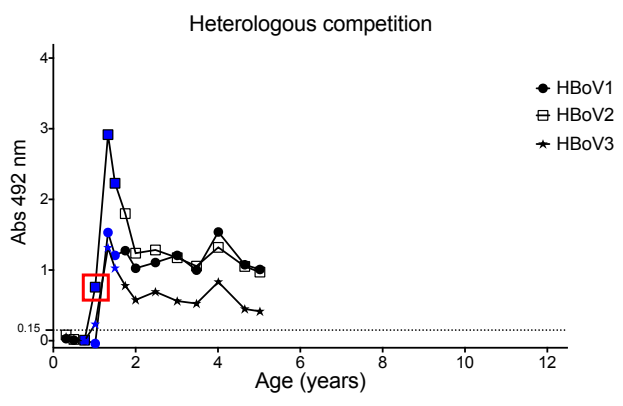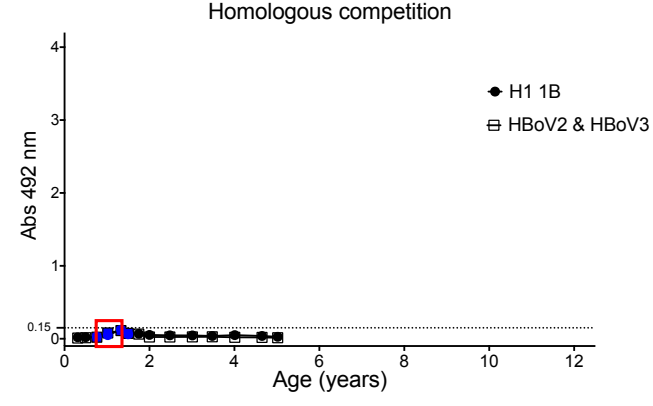

55

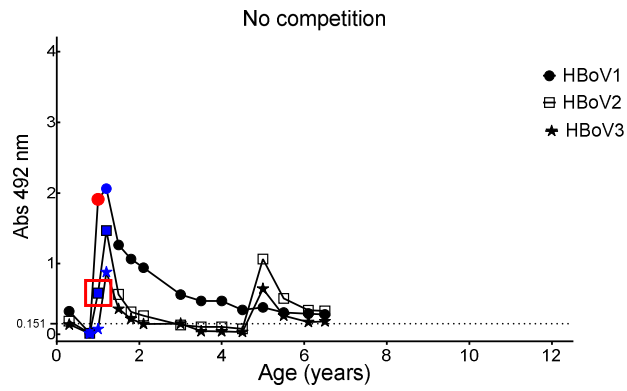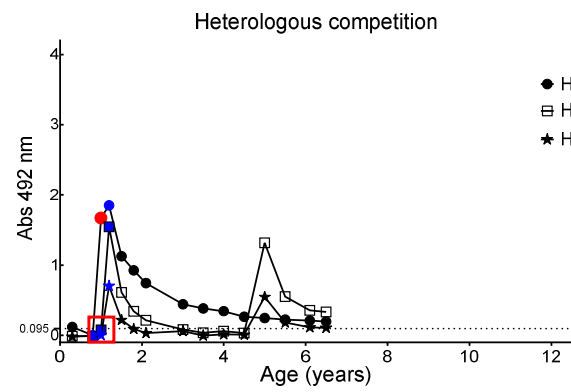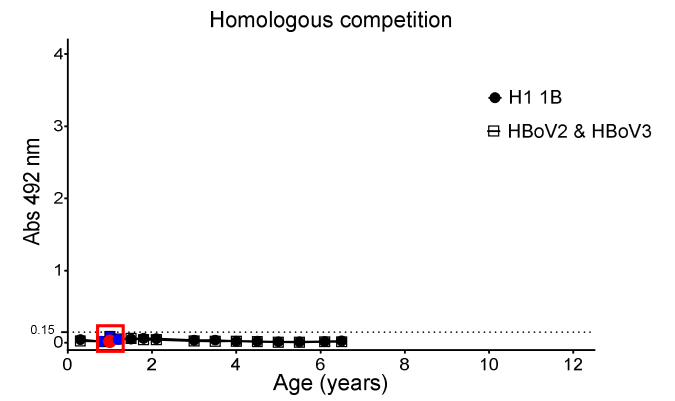

56

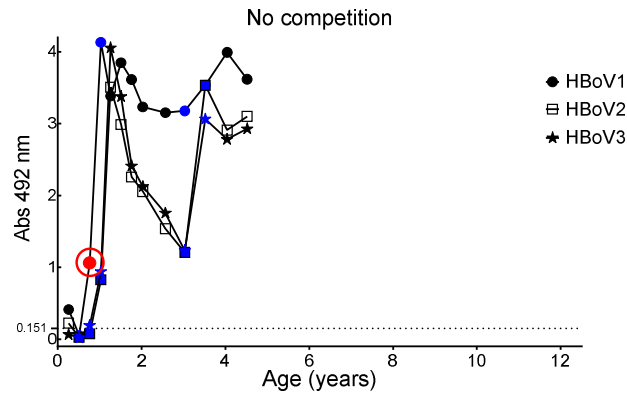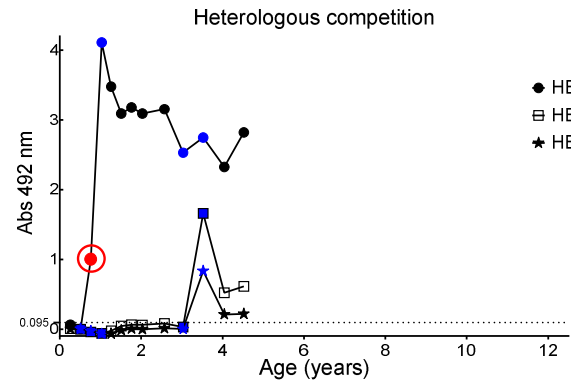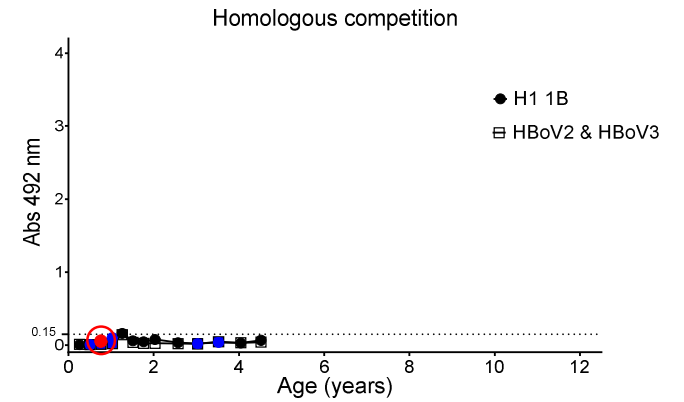

57

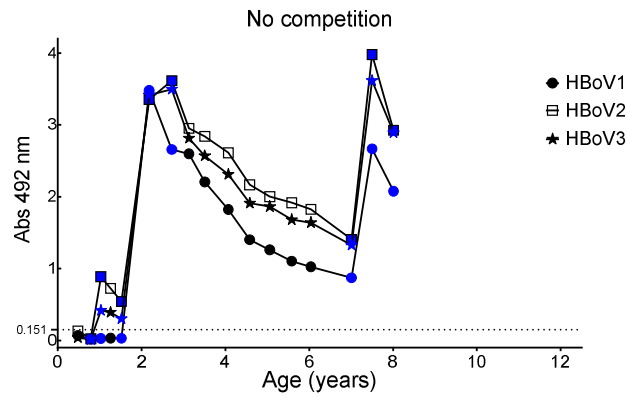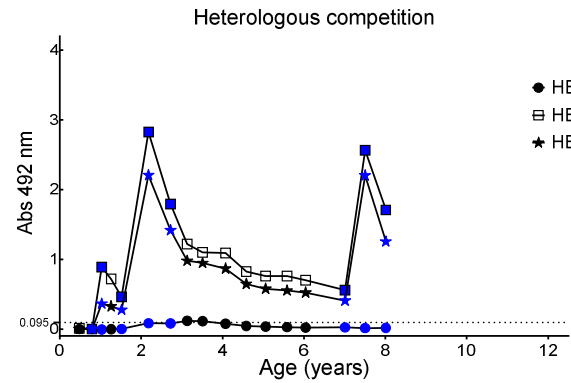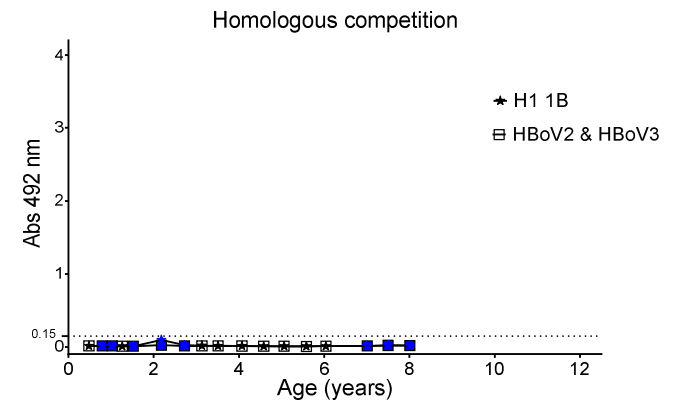

58

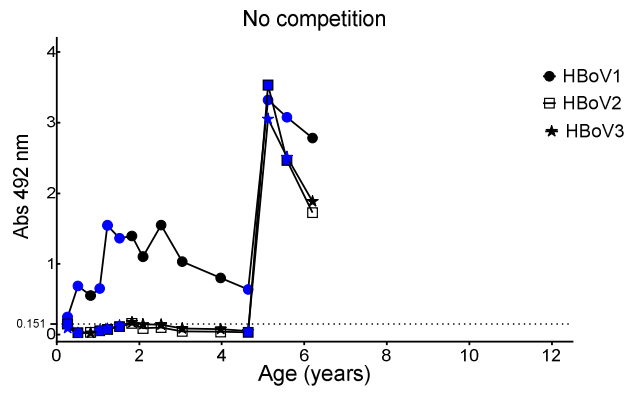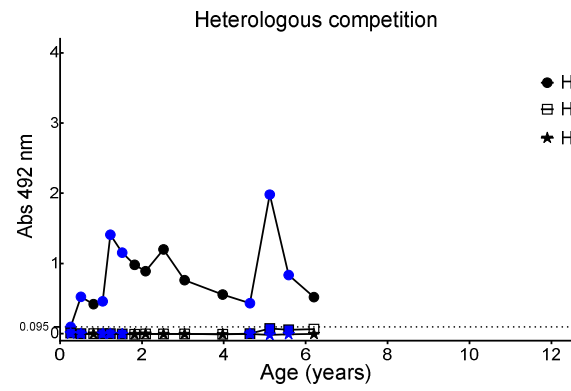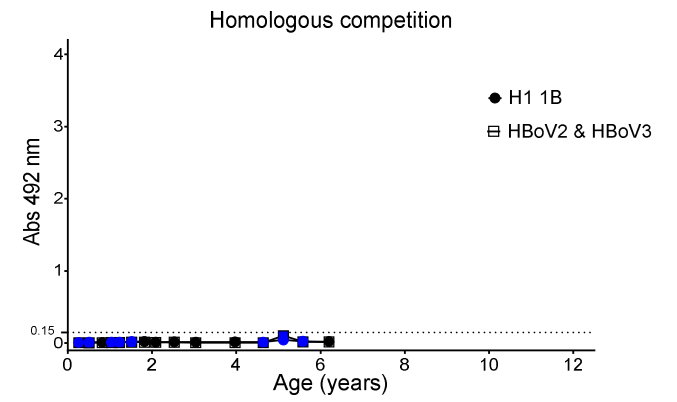

59

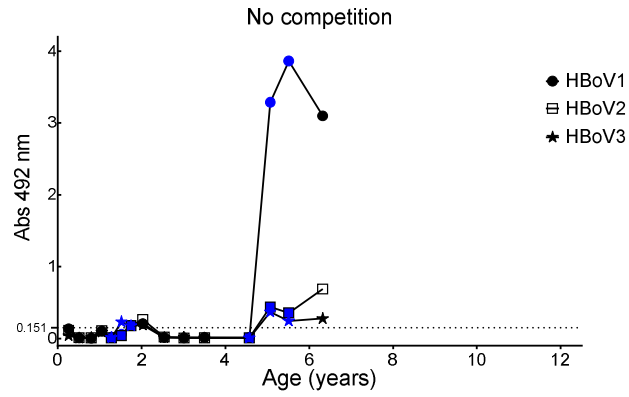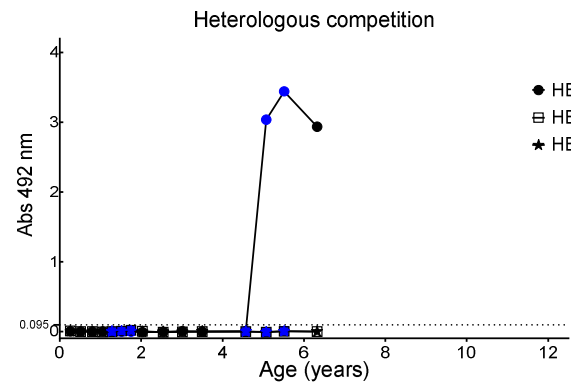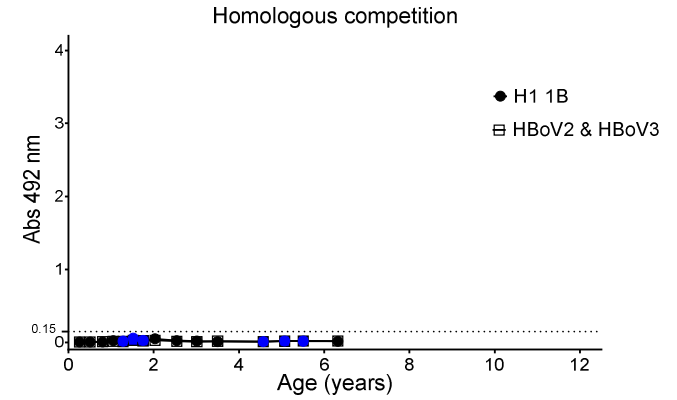

60

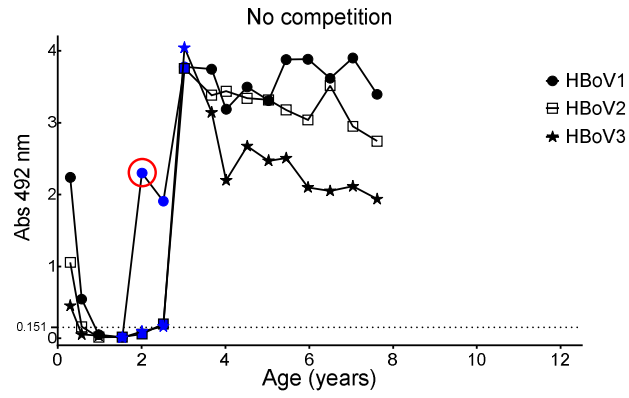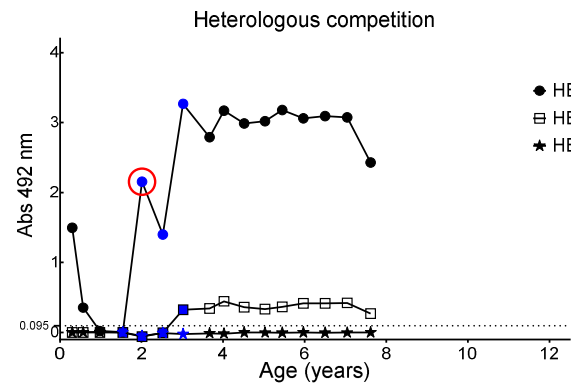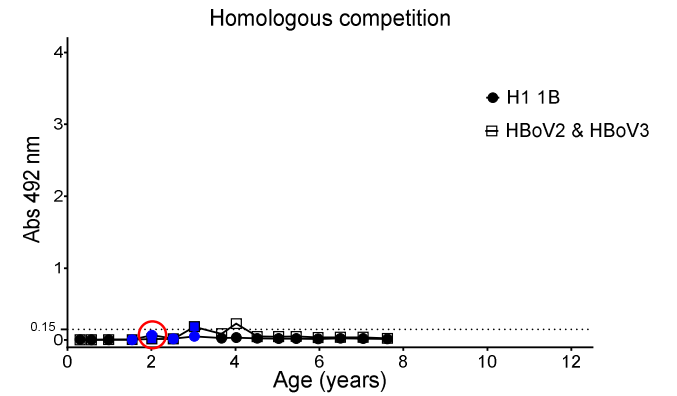

61

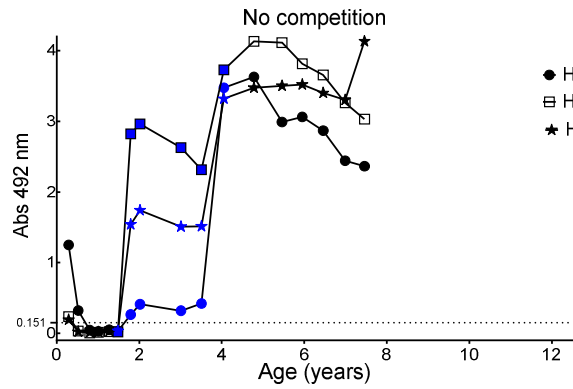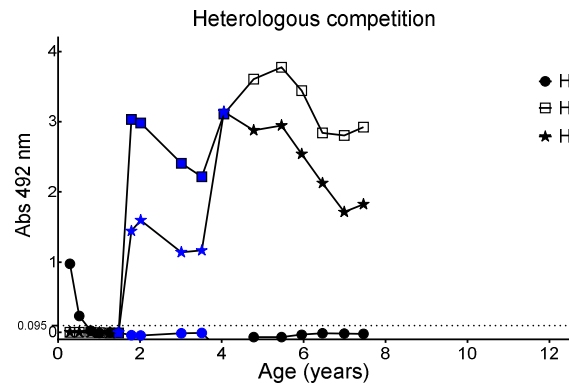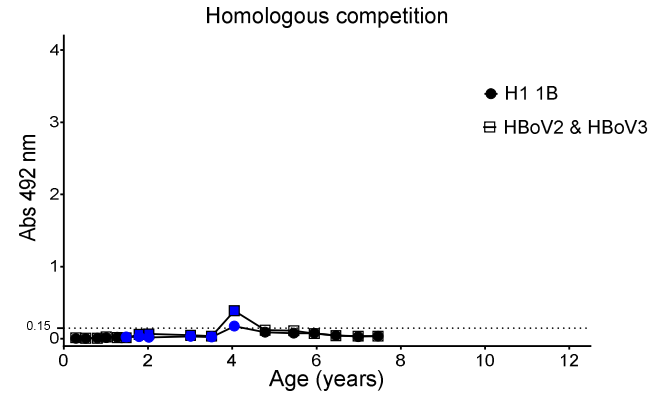

62

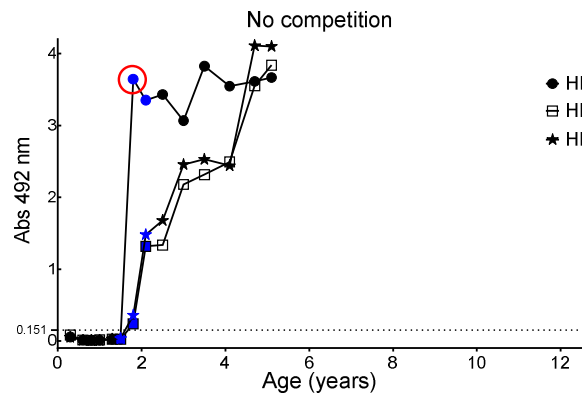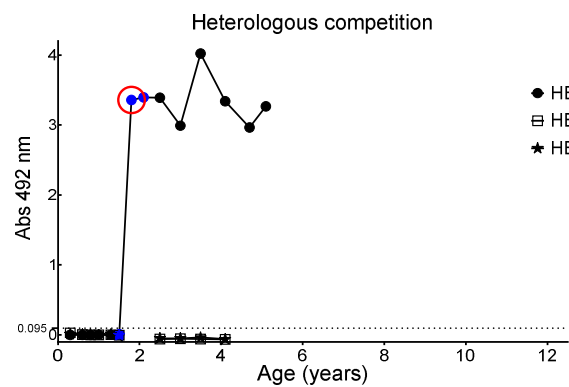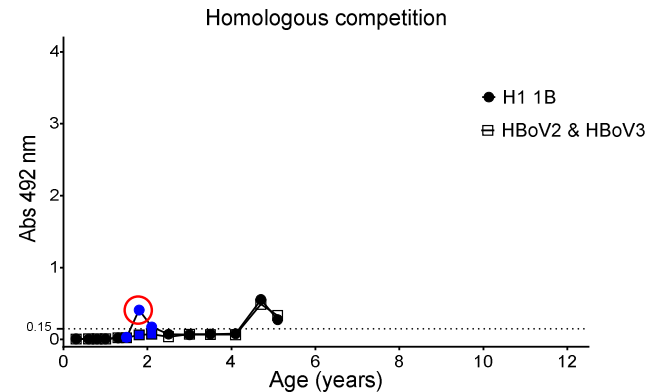

63

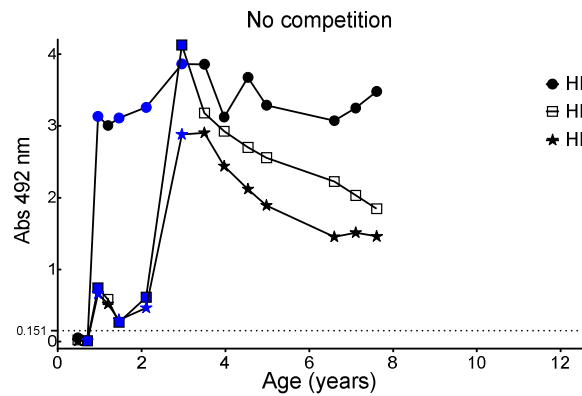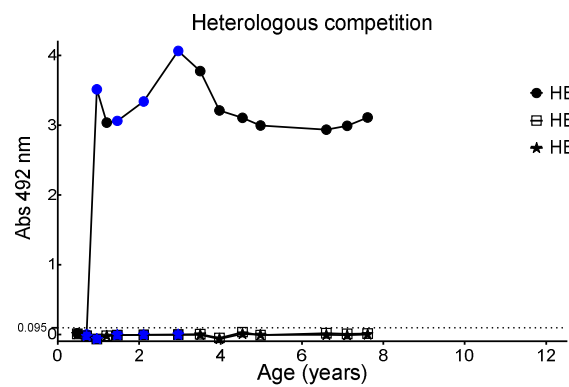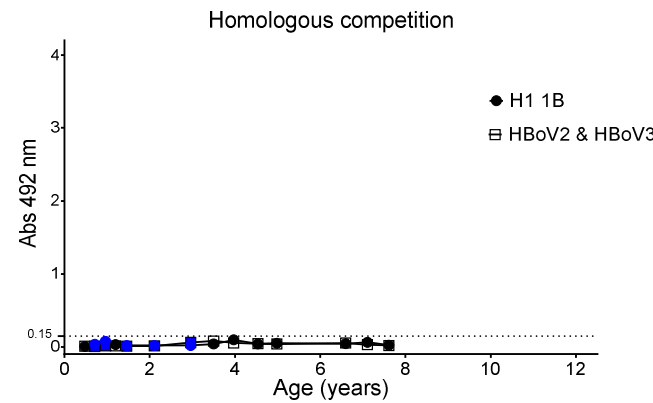

64

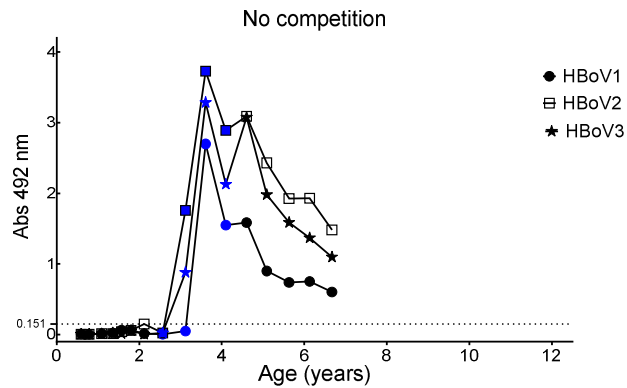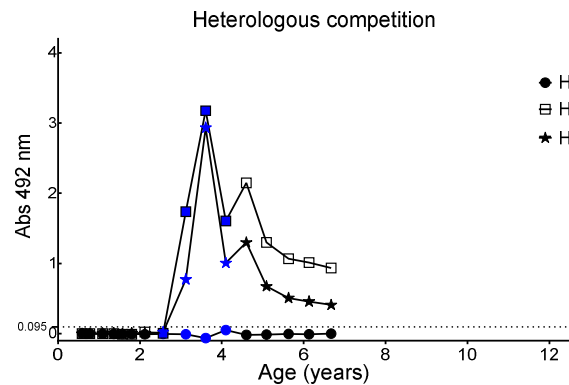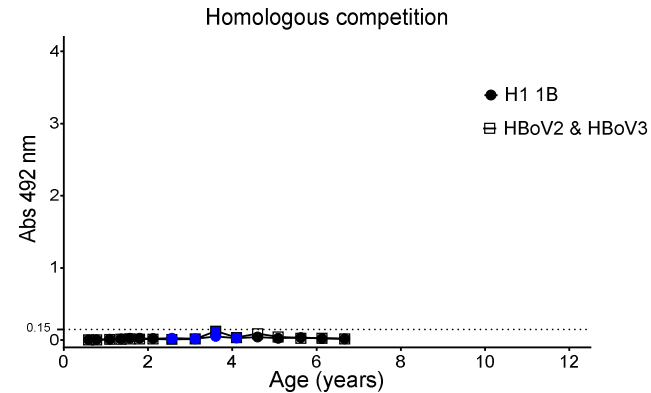

65

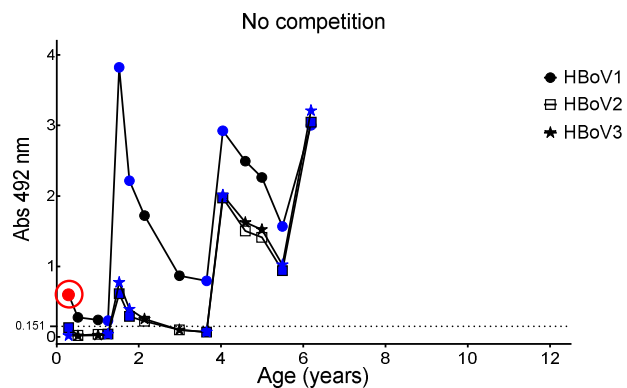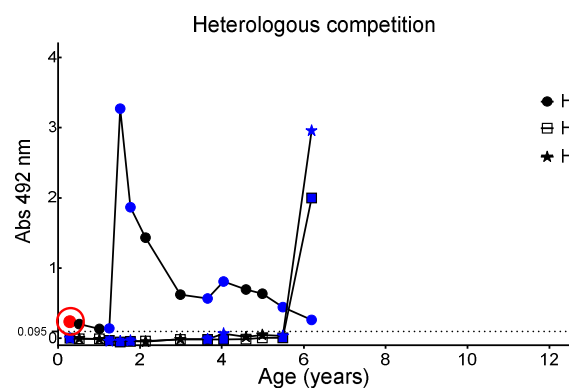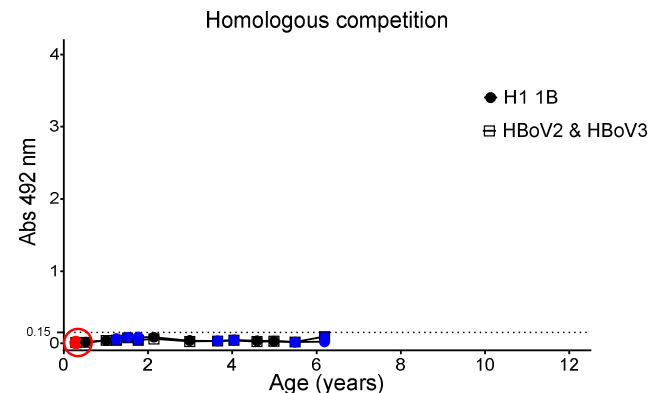

66

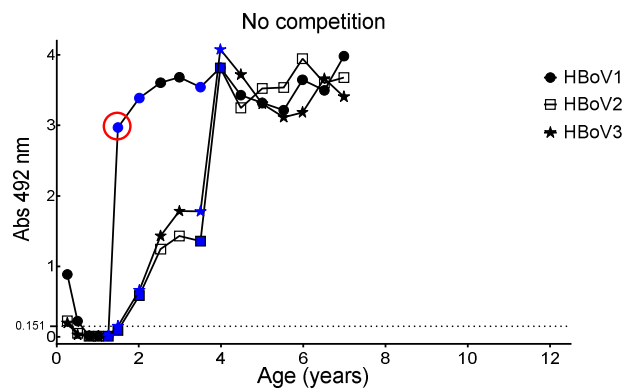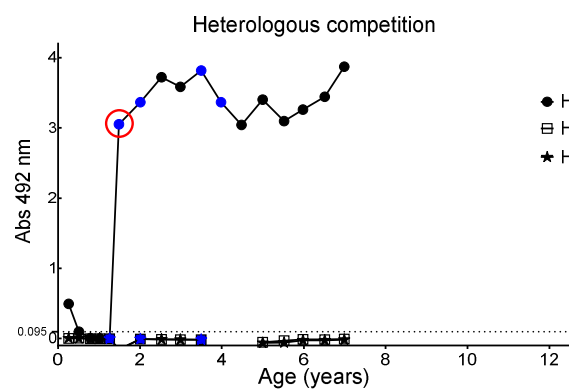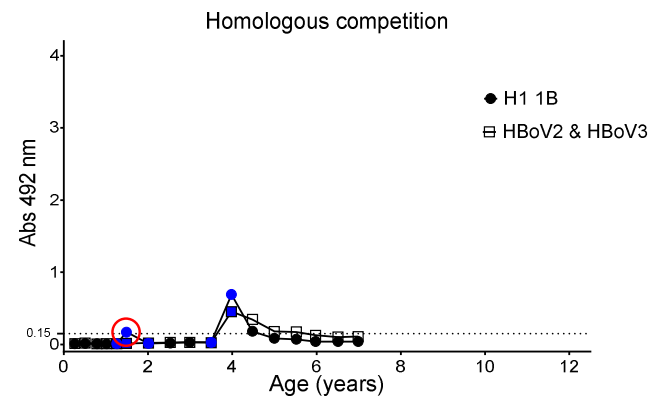

67

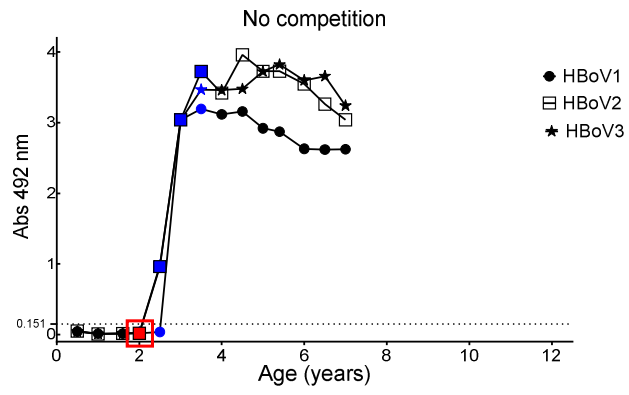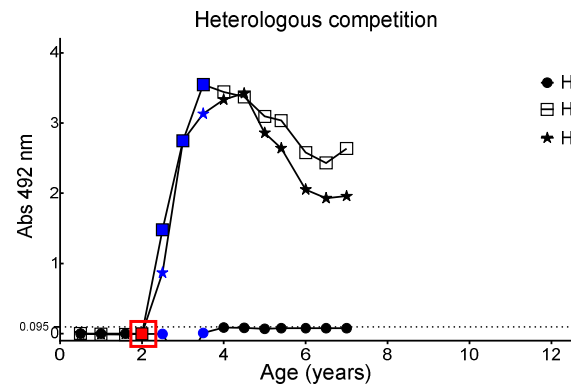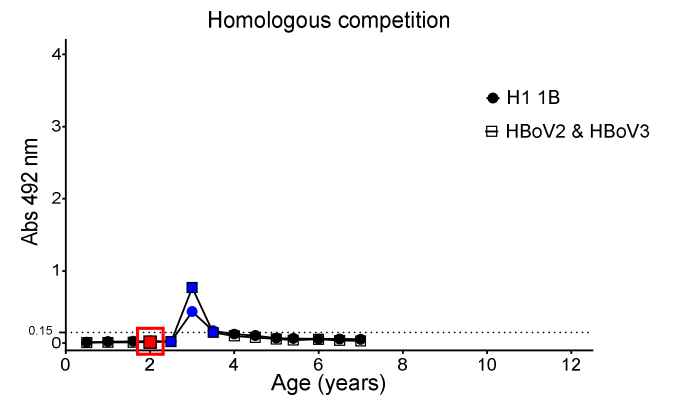

68

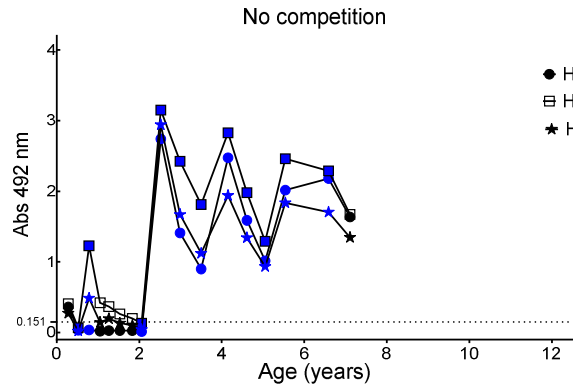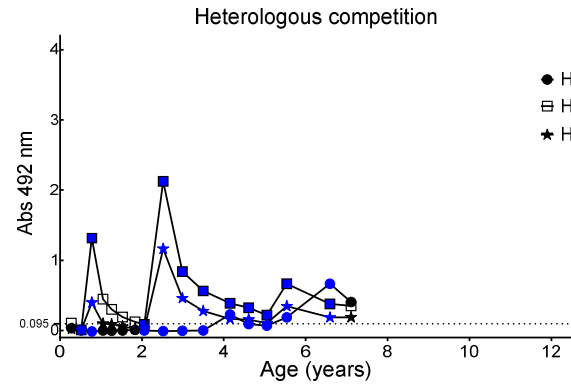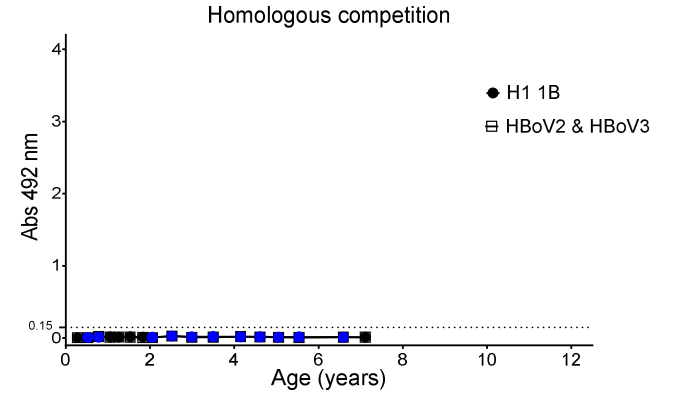

69

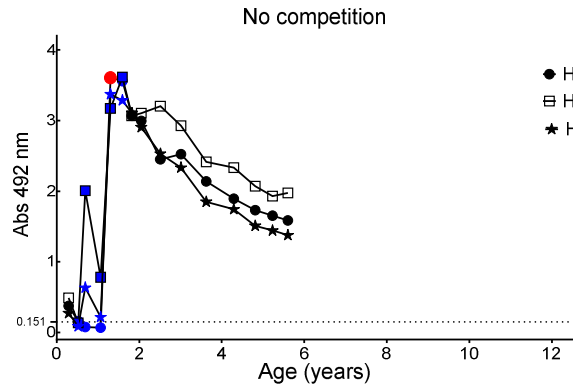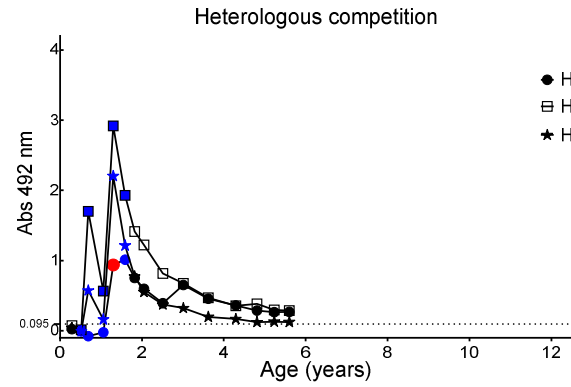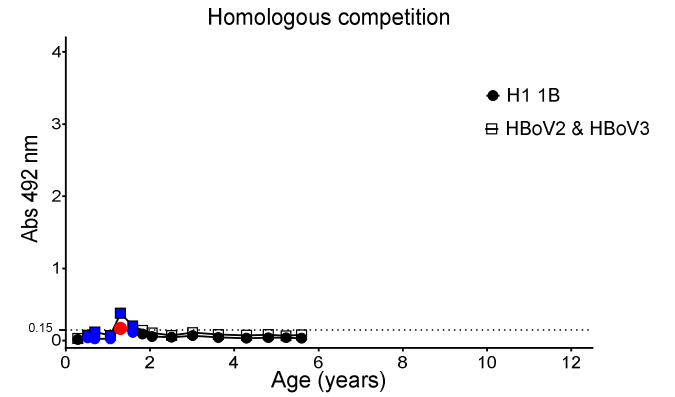



70

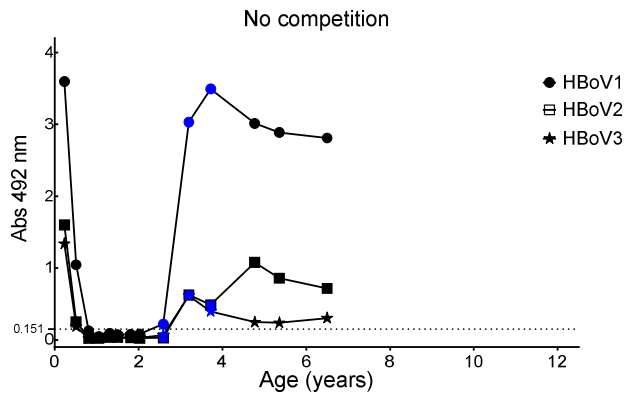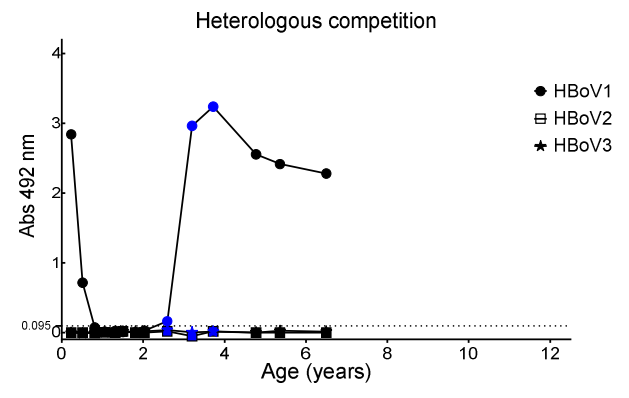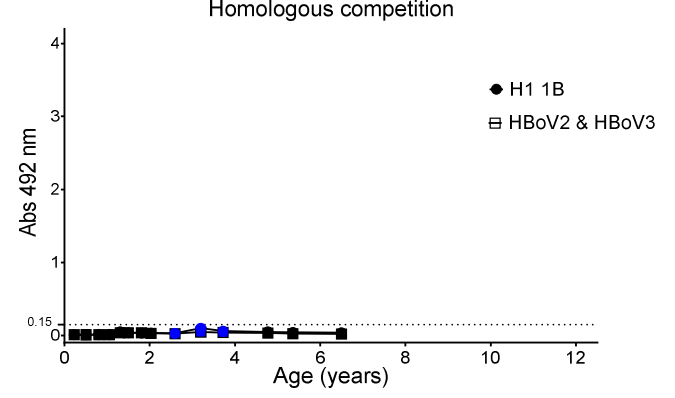

71

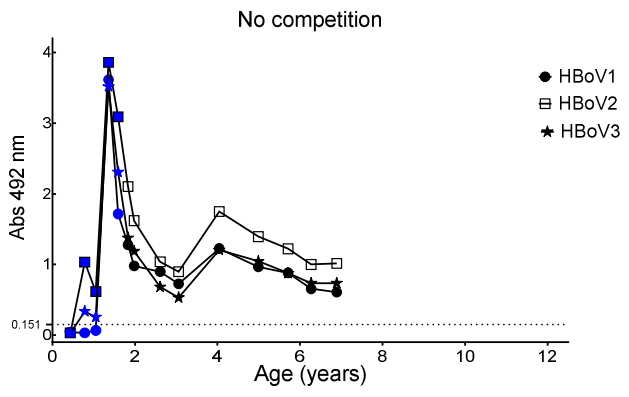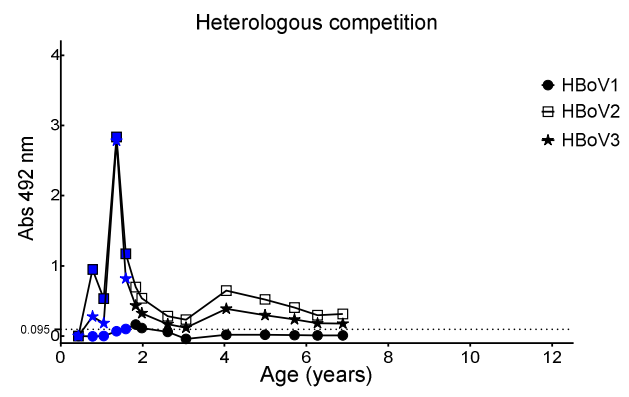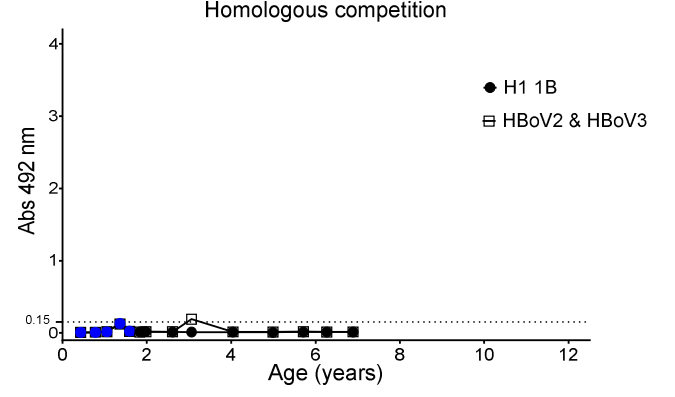

72

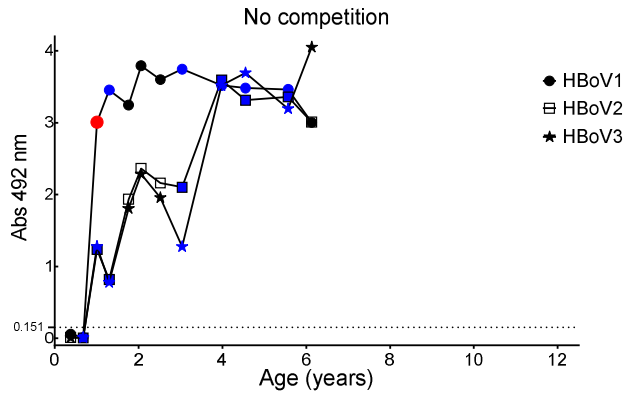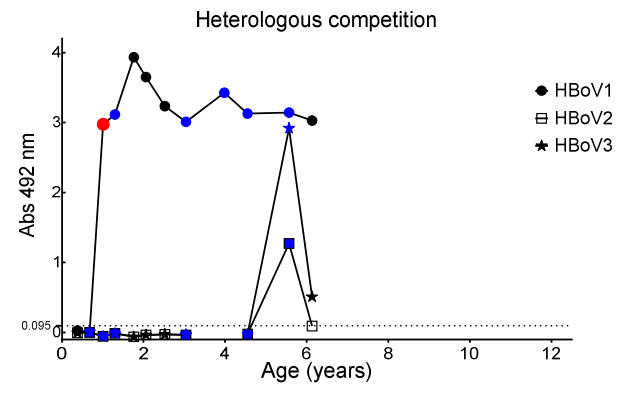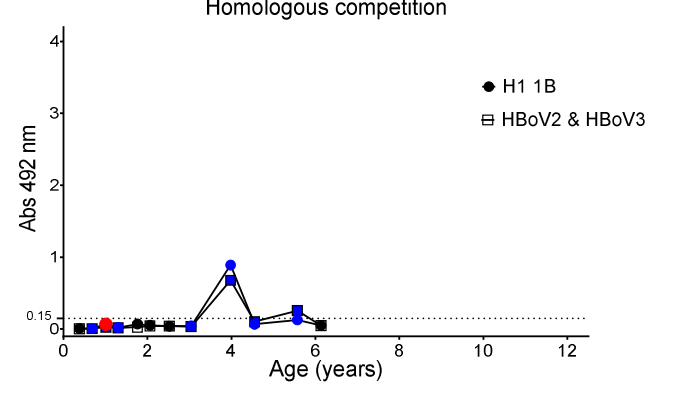

73

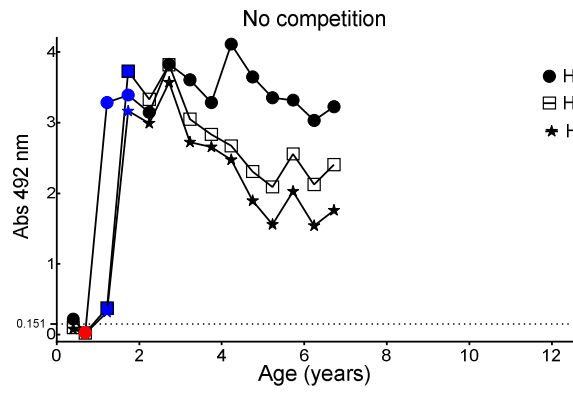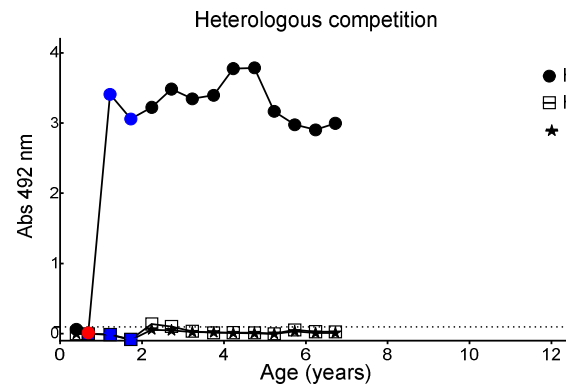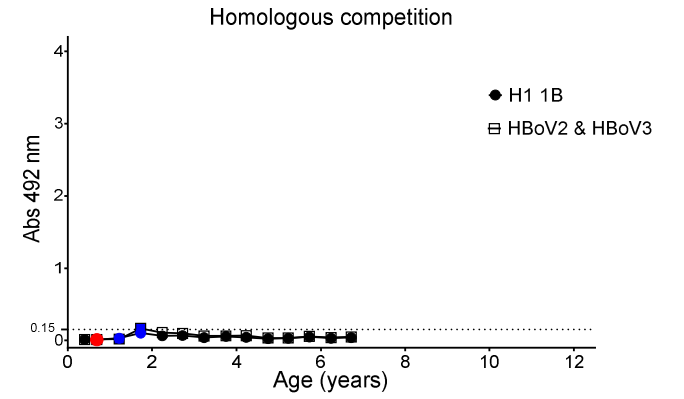

74

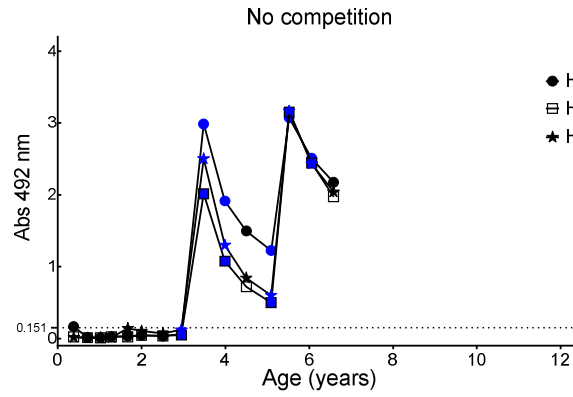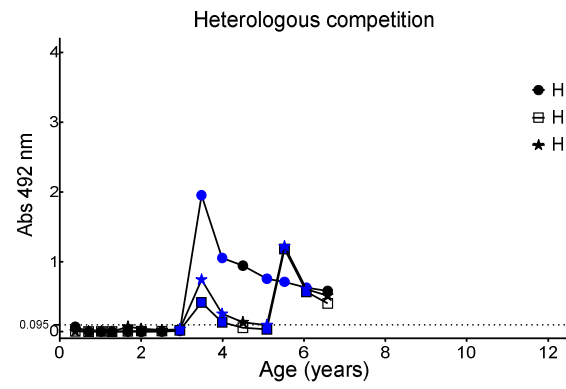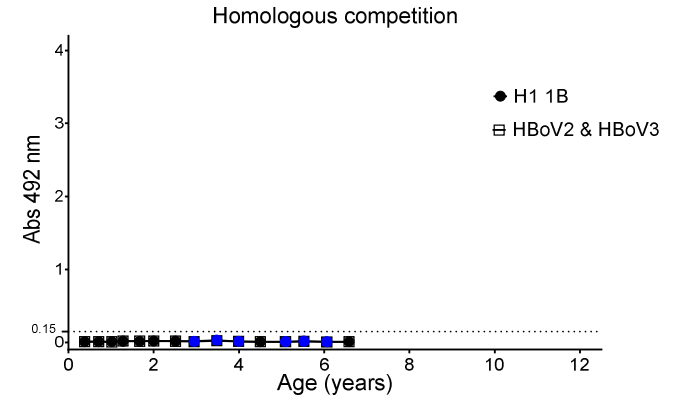

75

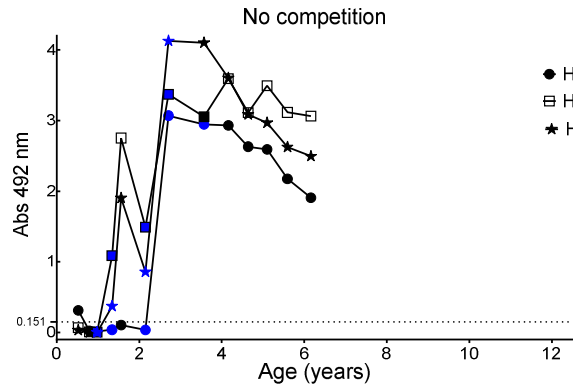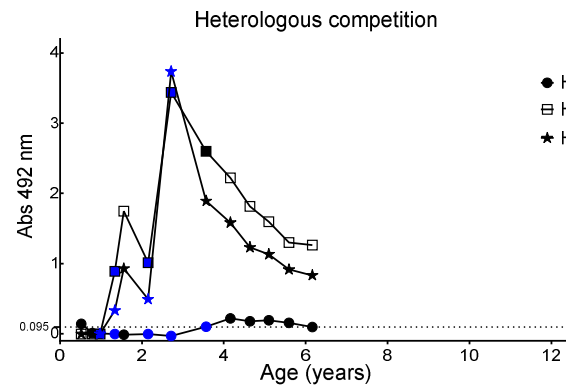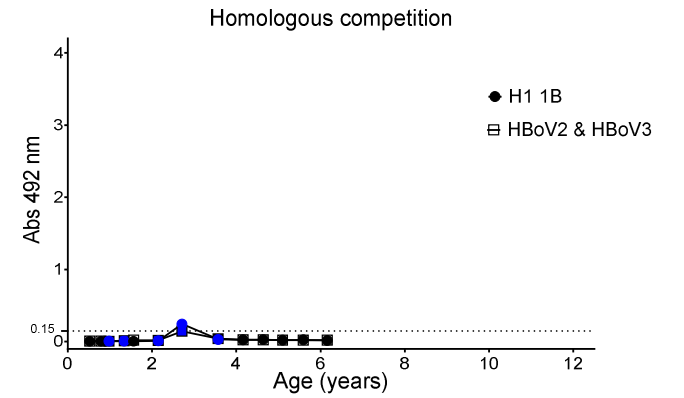

77

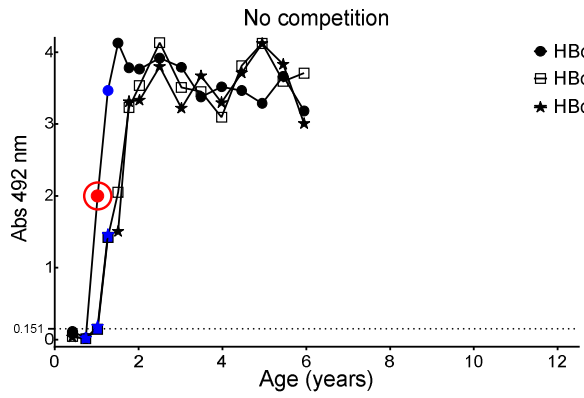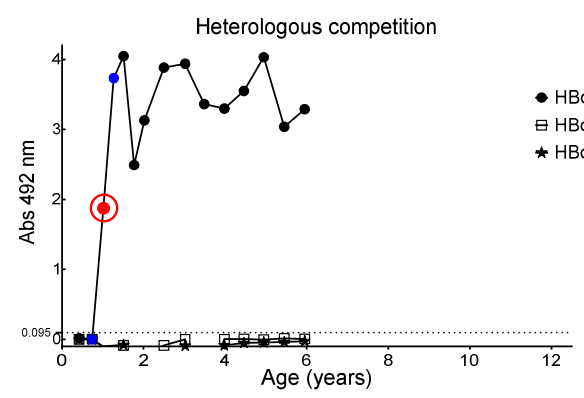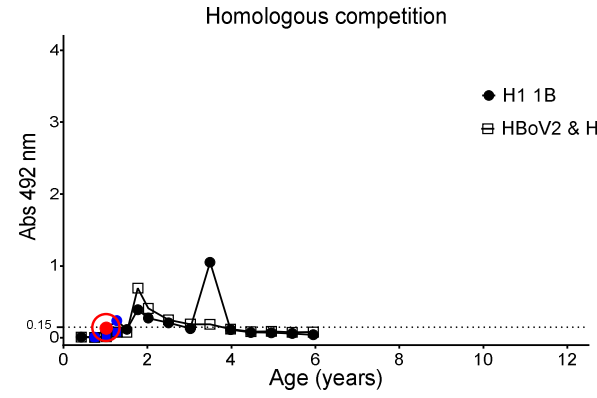

79

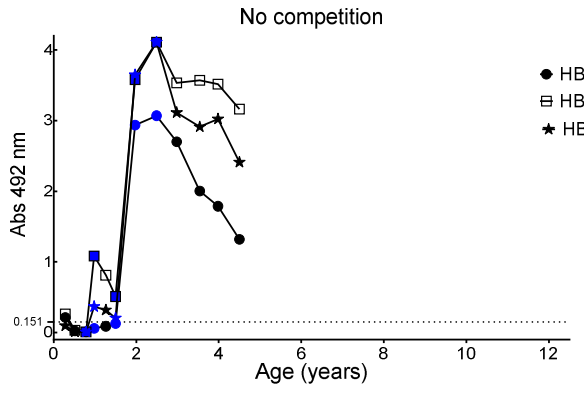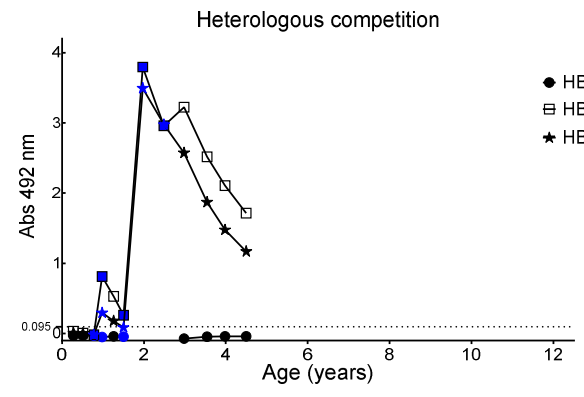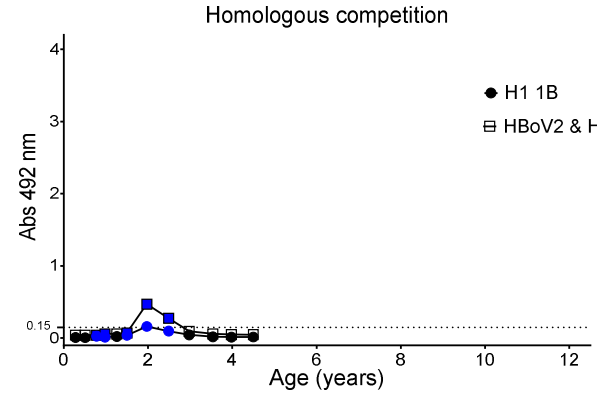

82

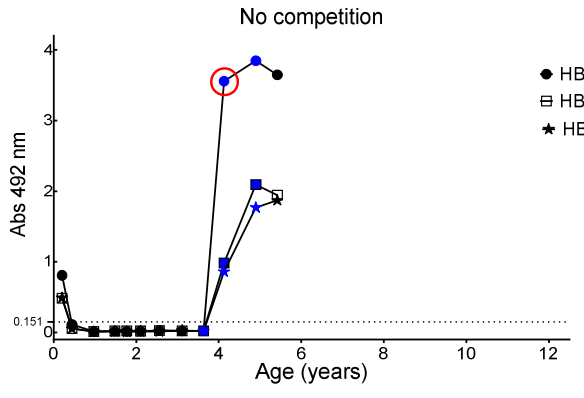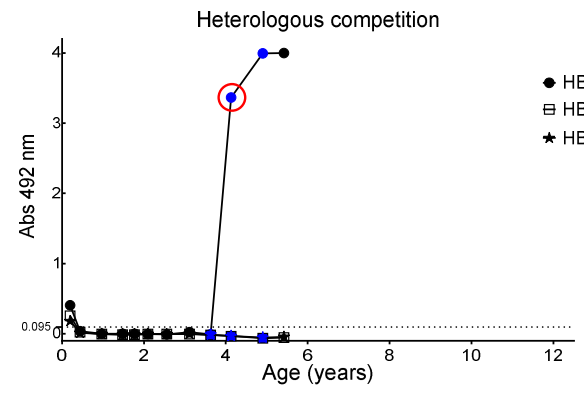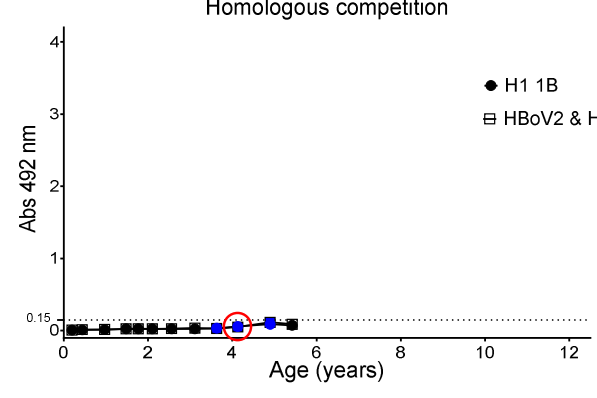

91

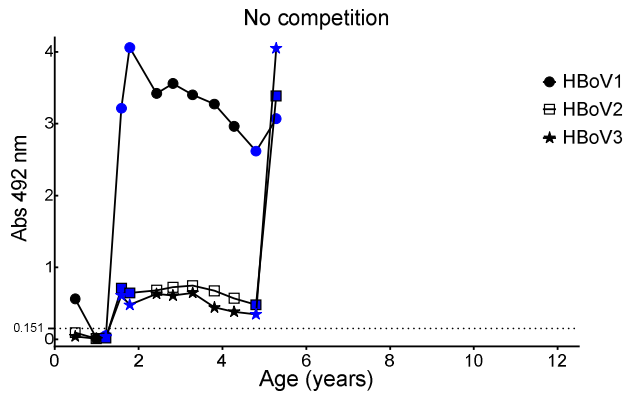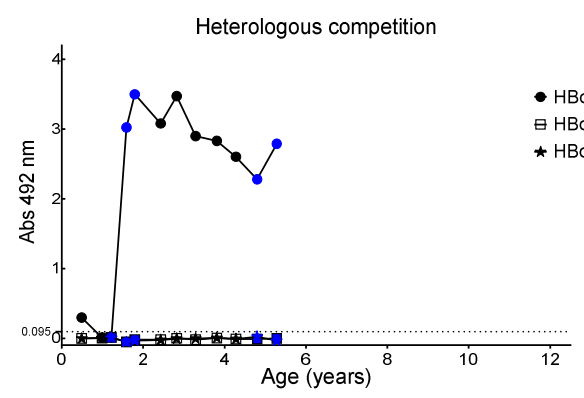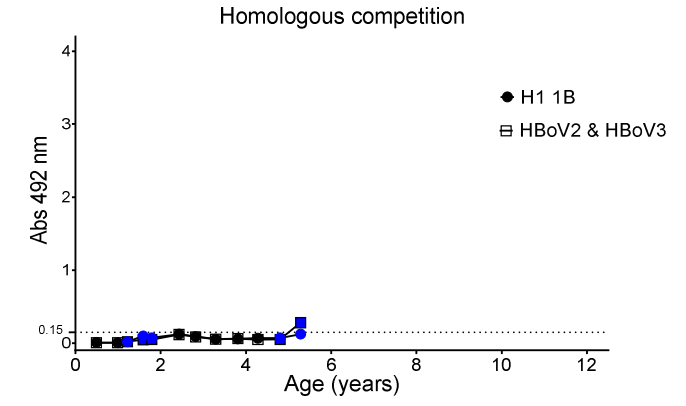

101

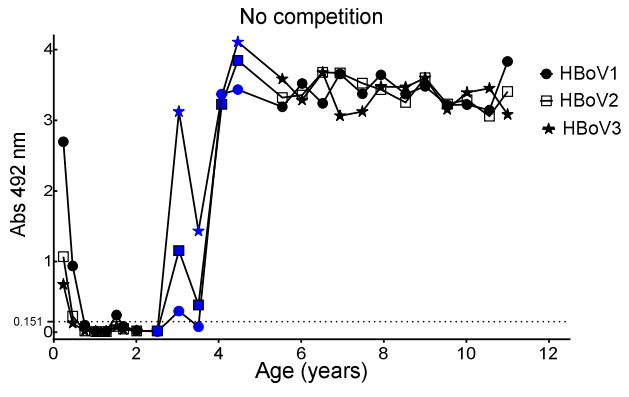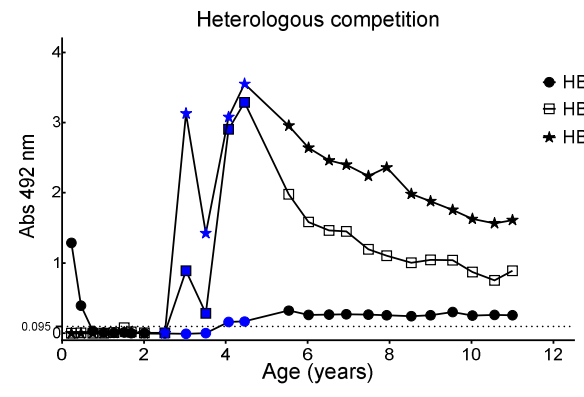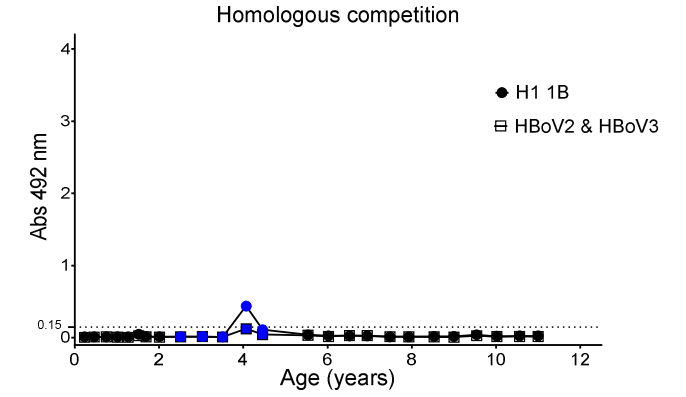

102

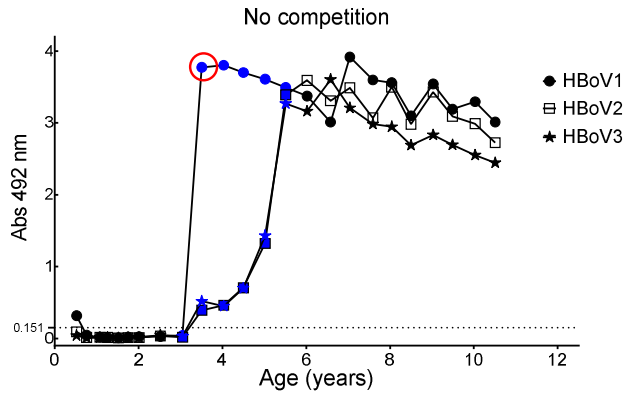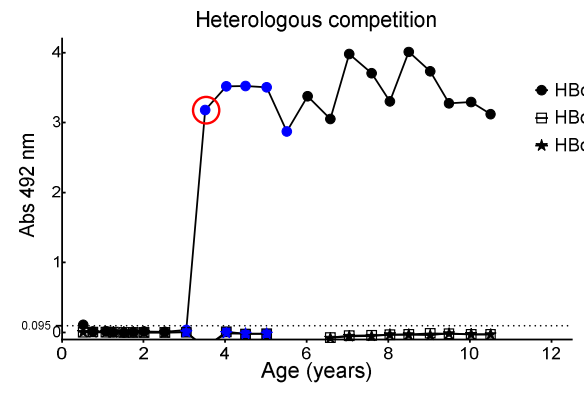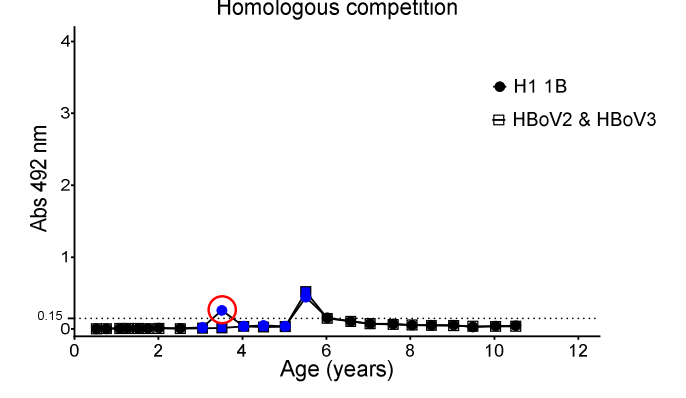

103

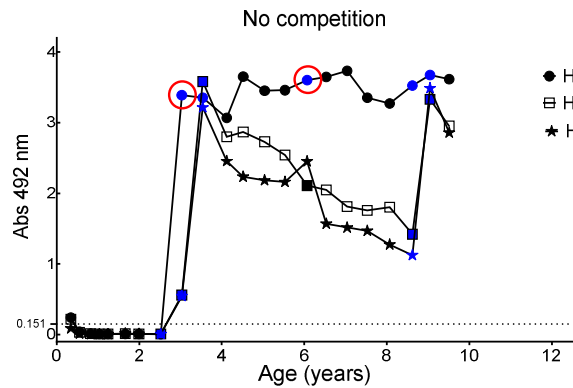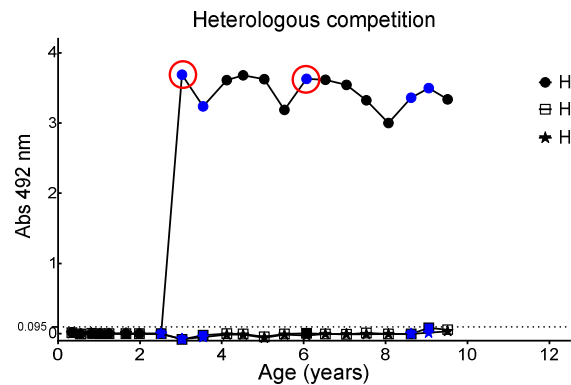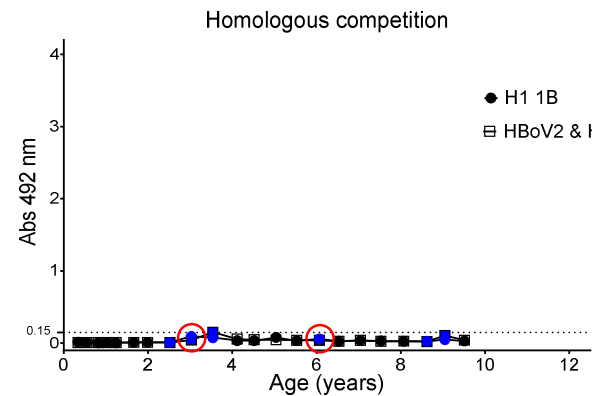

104

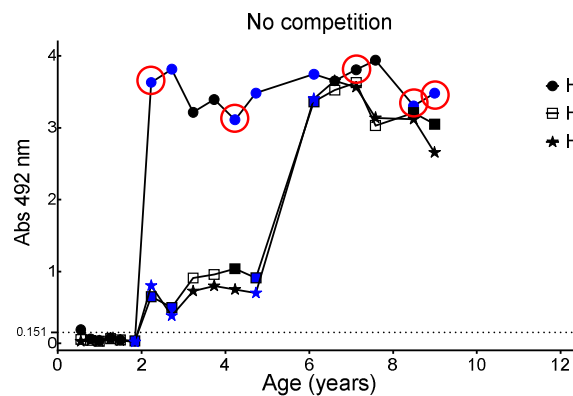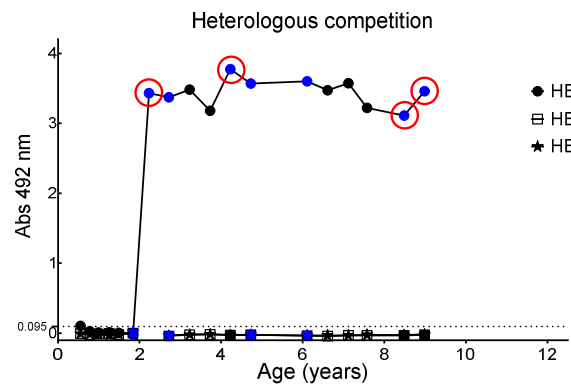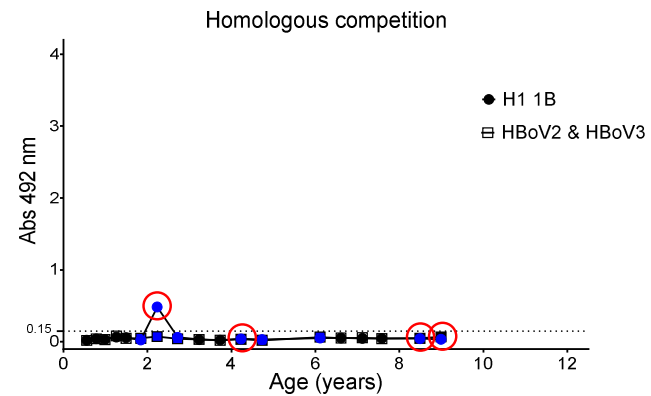

105

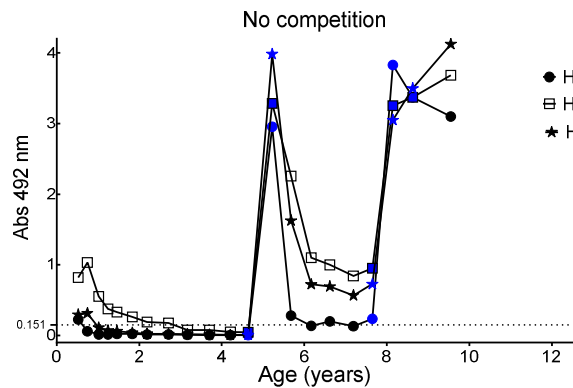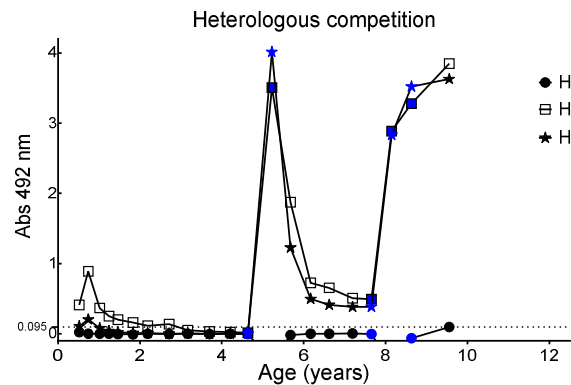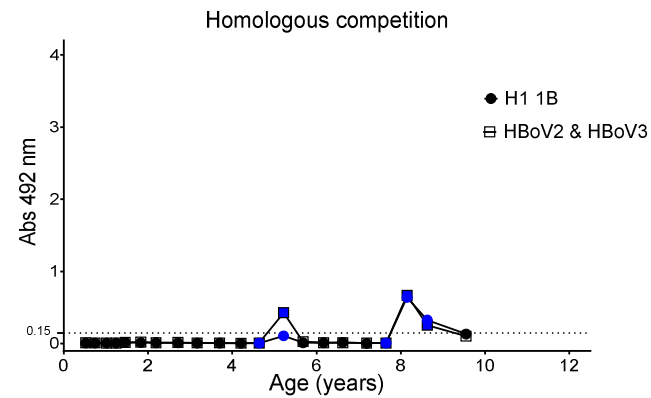

106

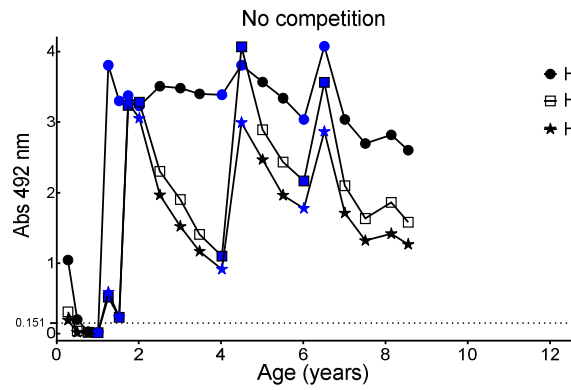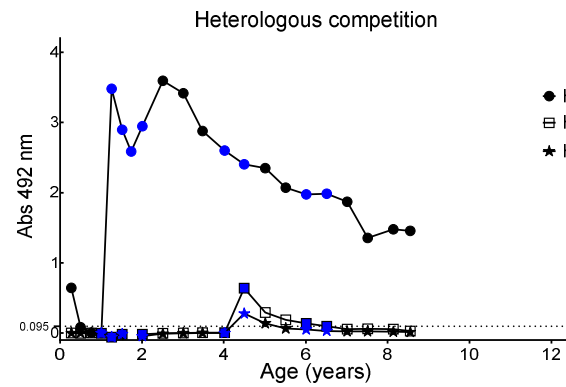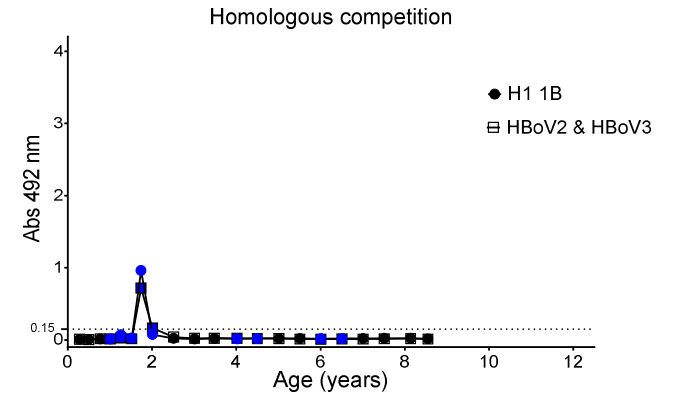

107

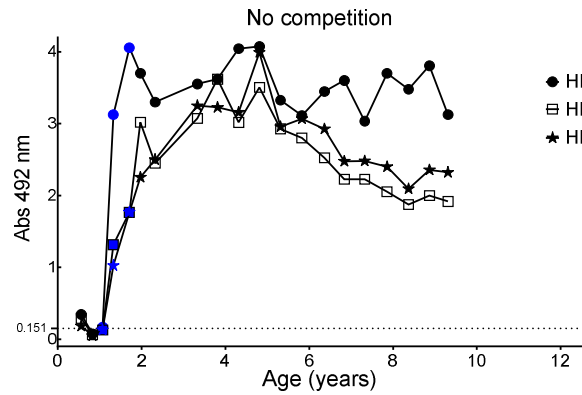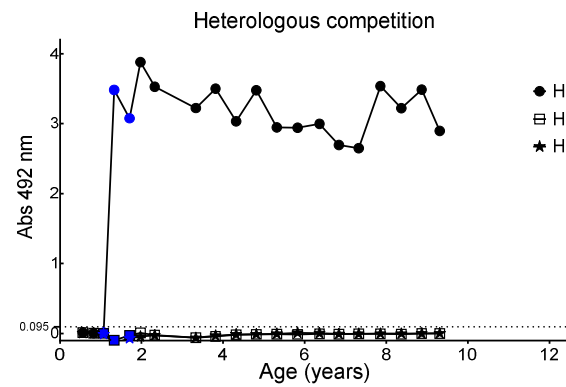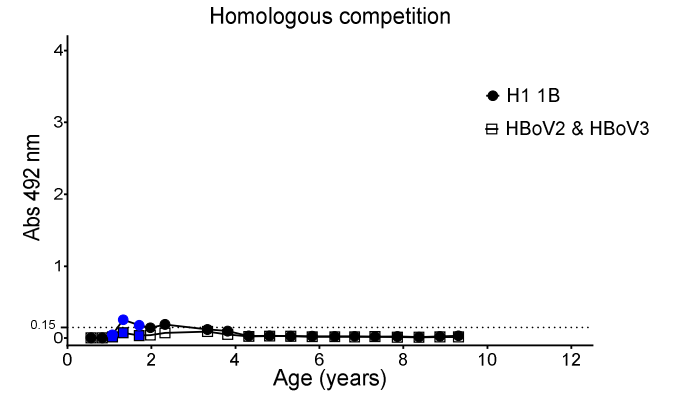

108

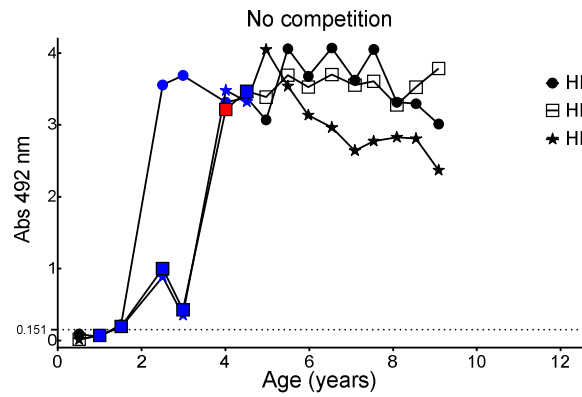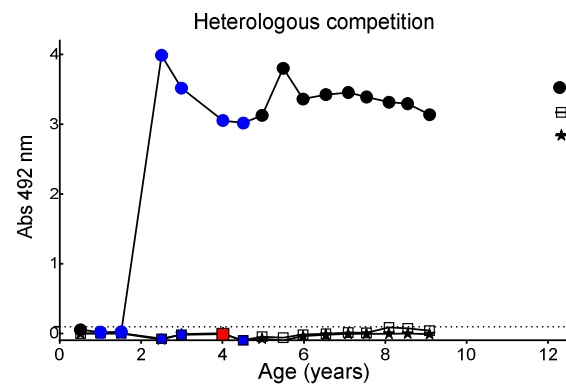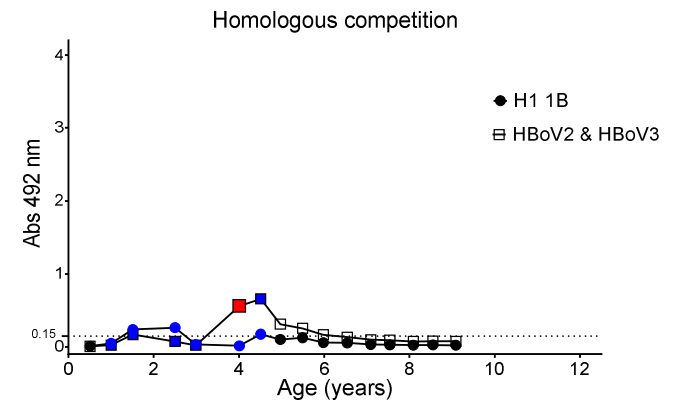

109

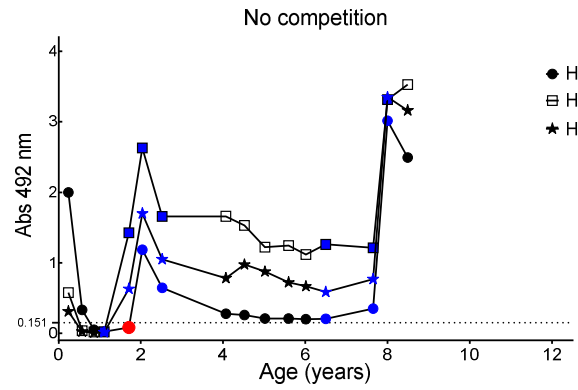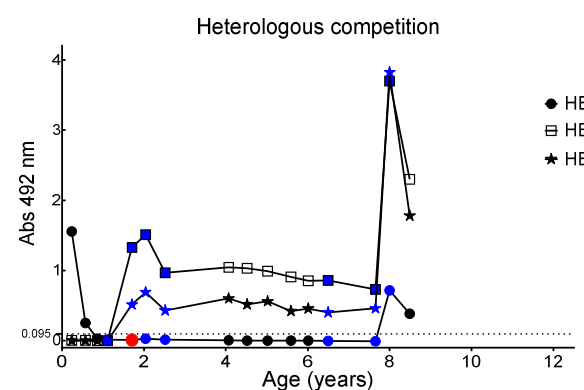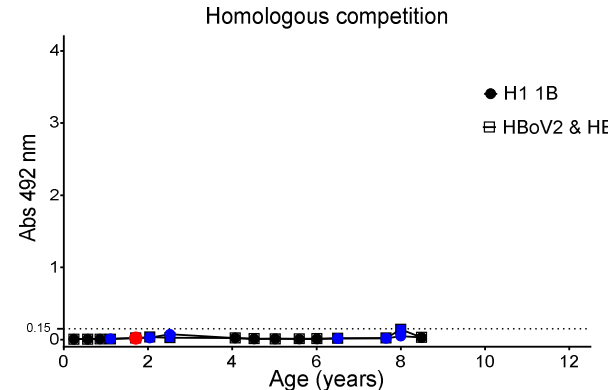

110

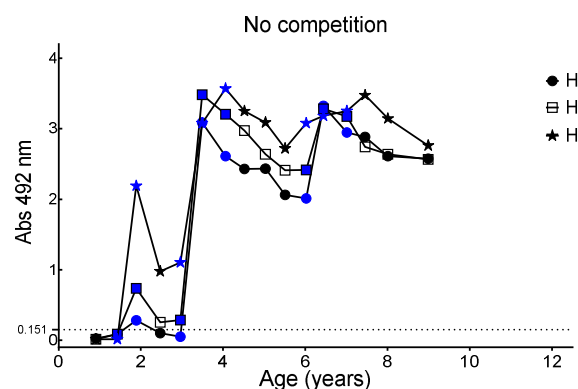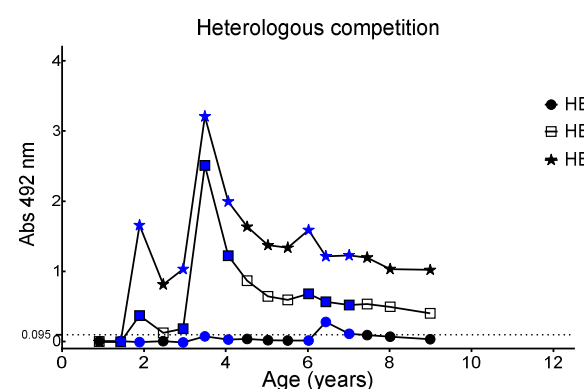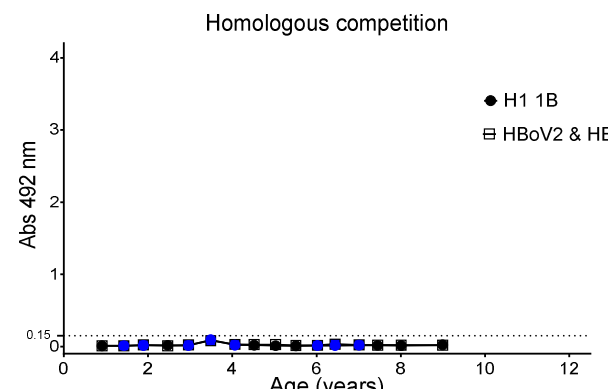

111

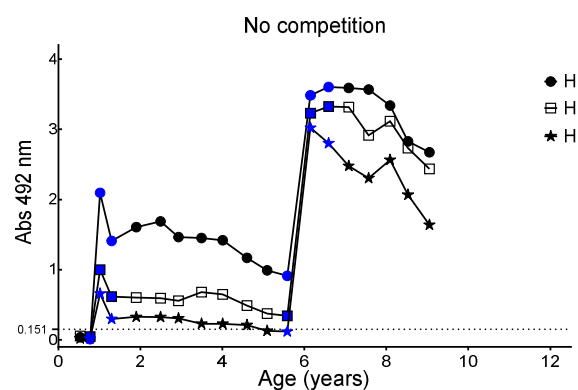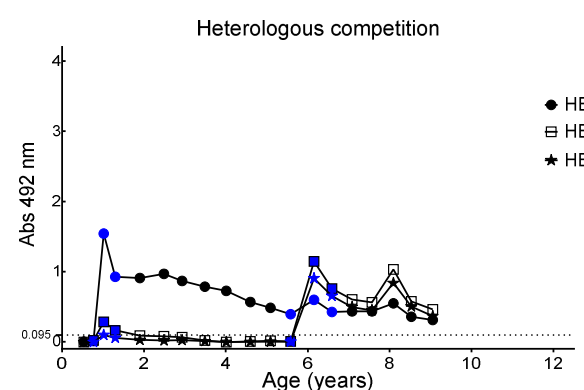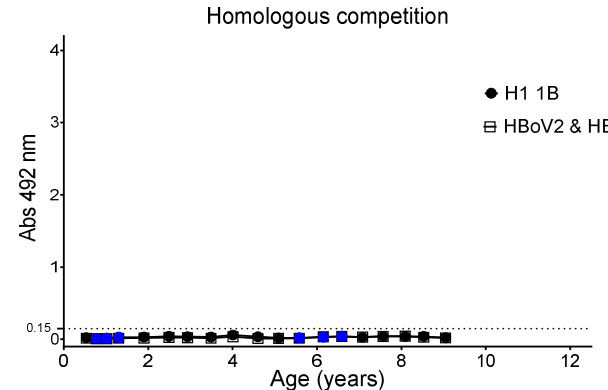

112

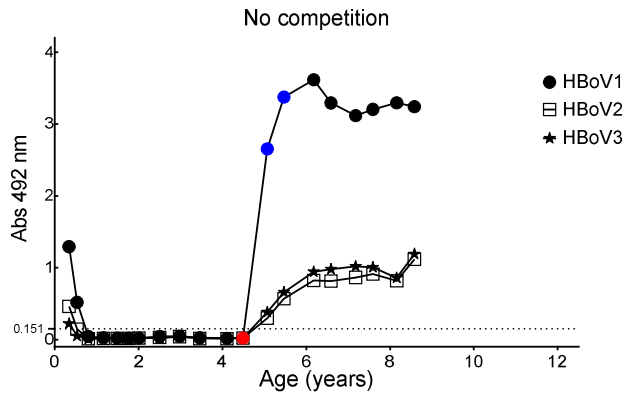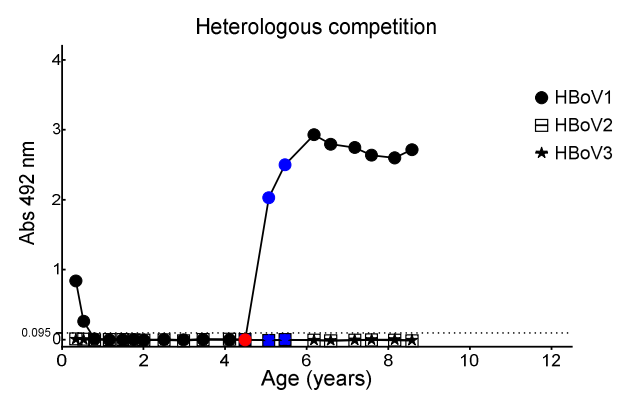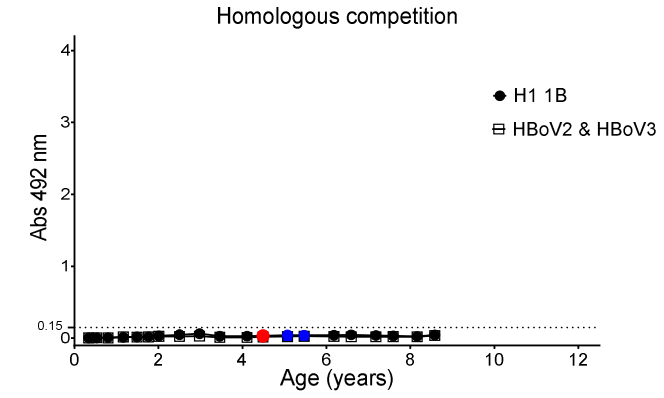

113

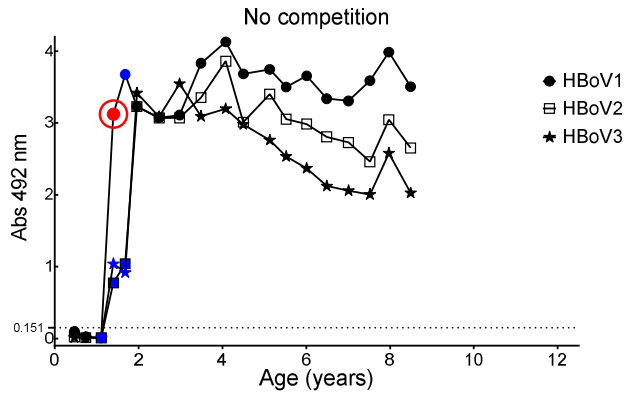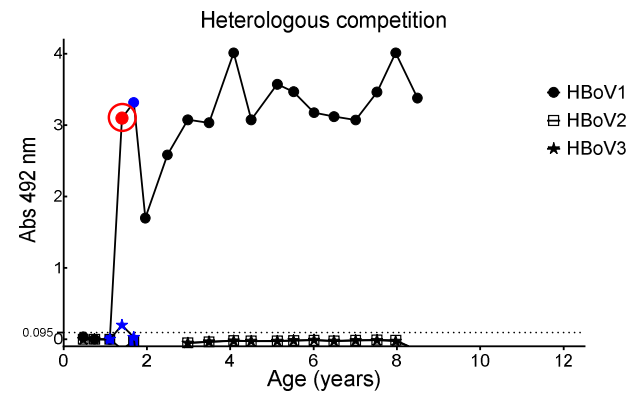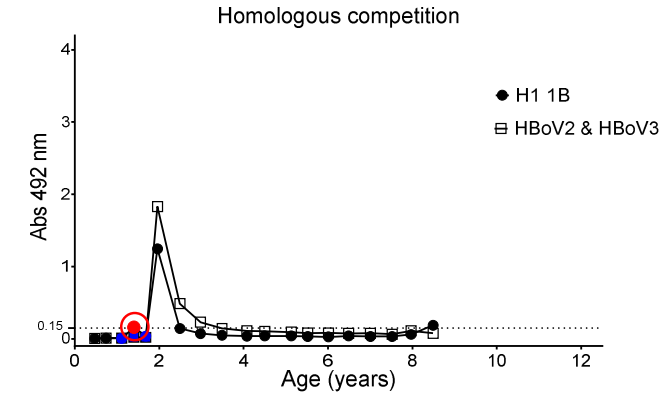

114

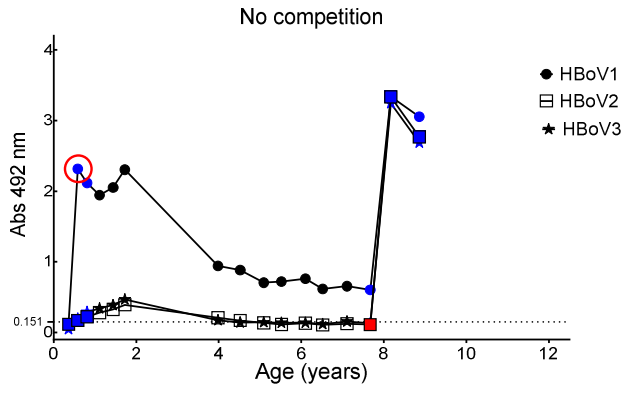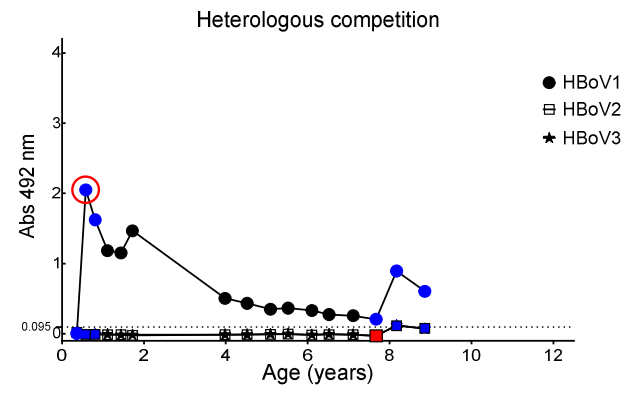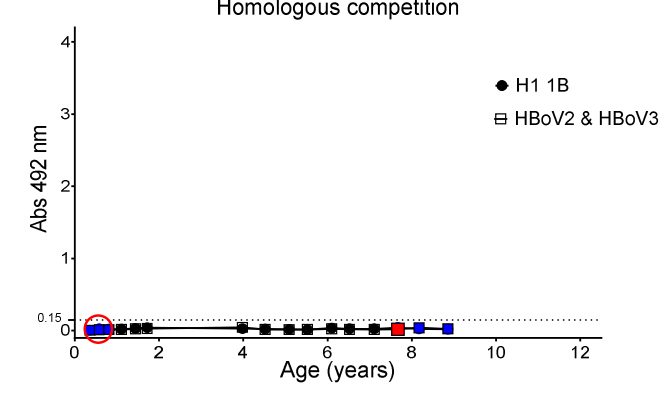



115

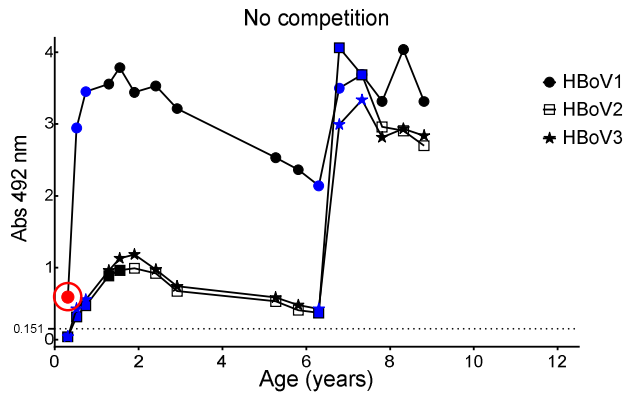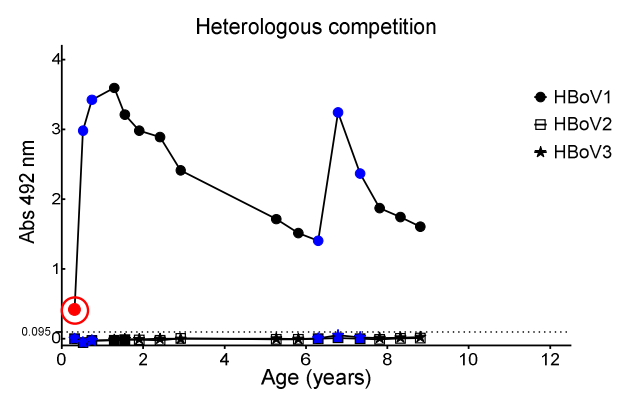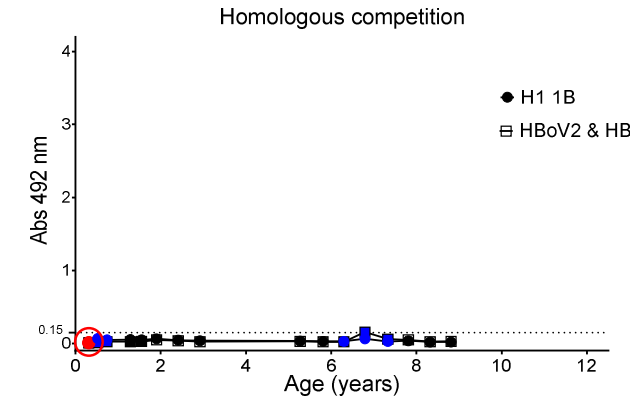

116

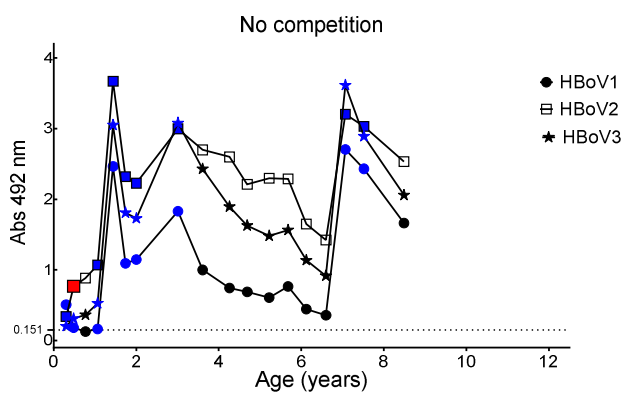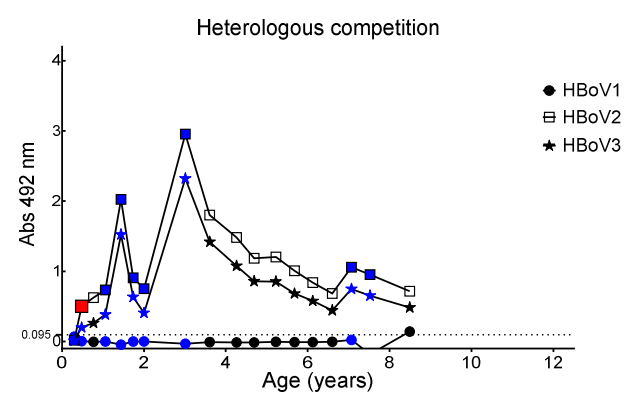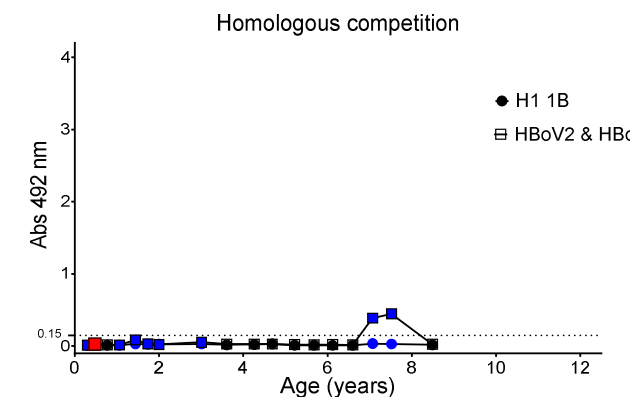

117

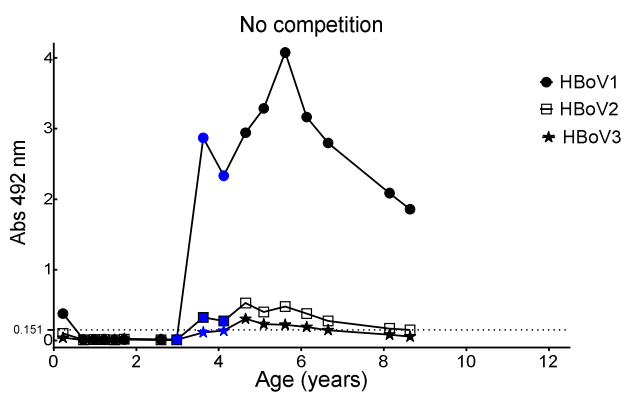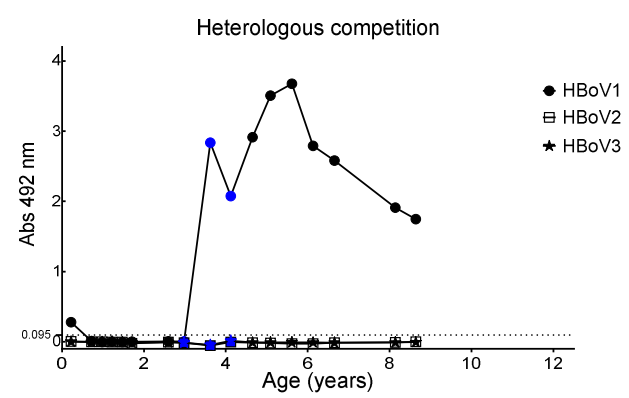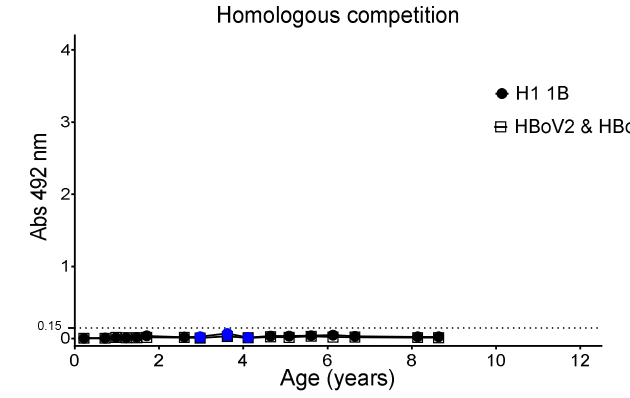

118

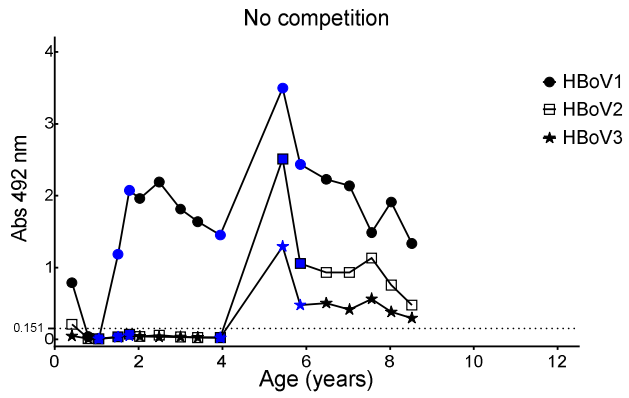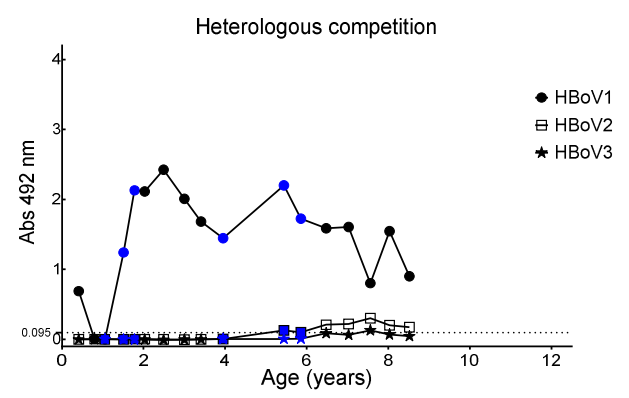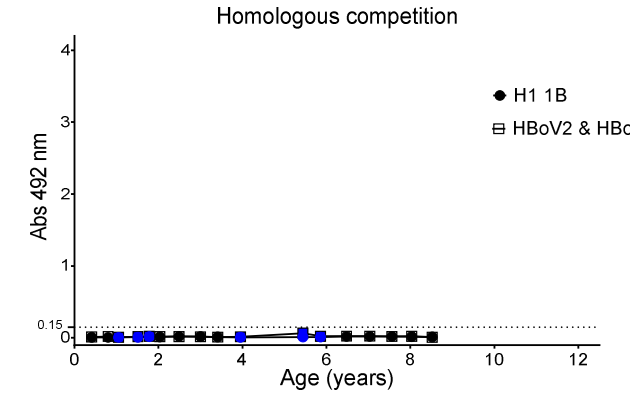

119

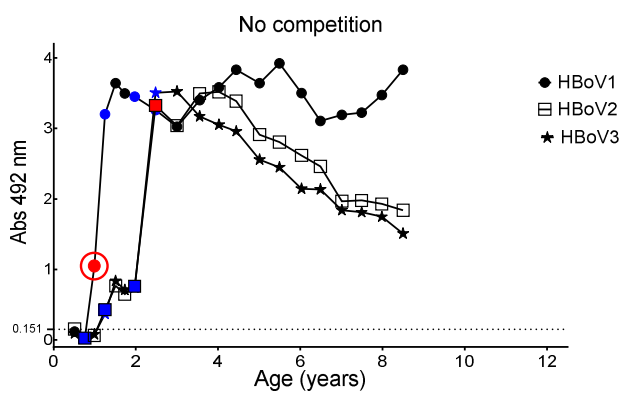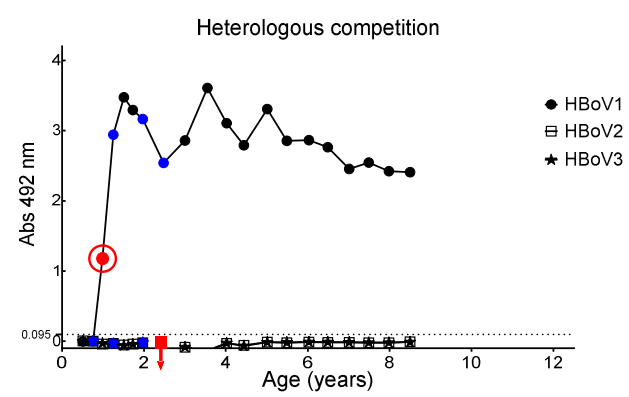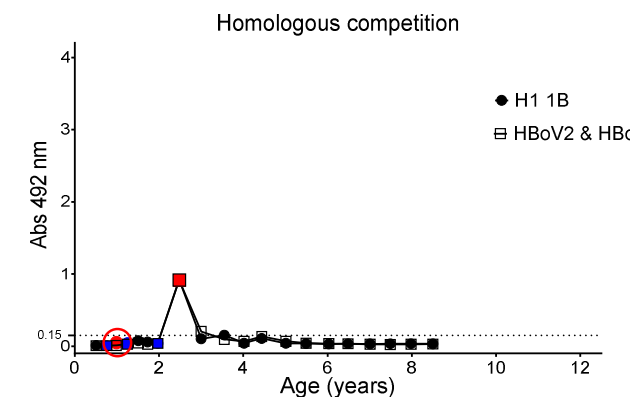

120

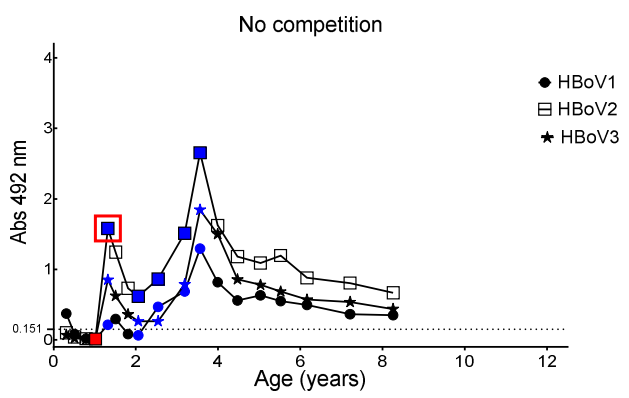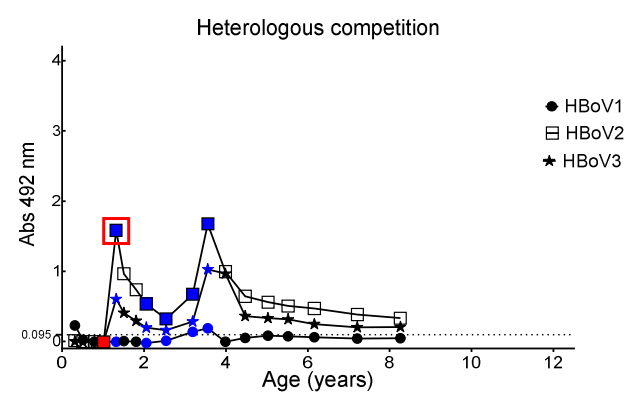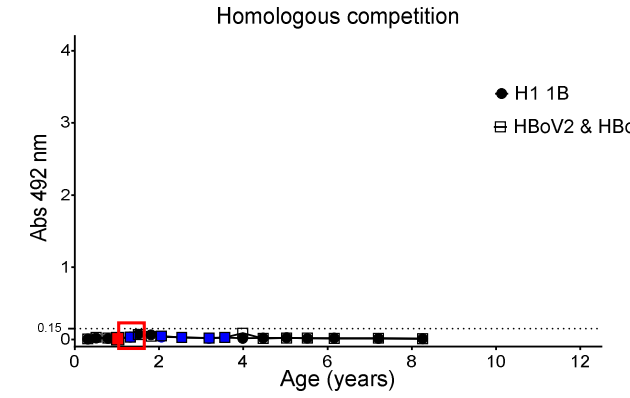



124

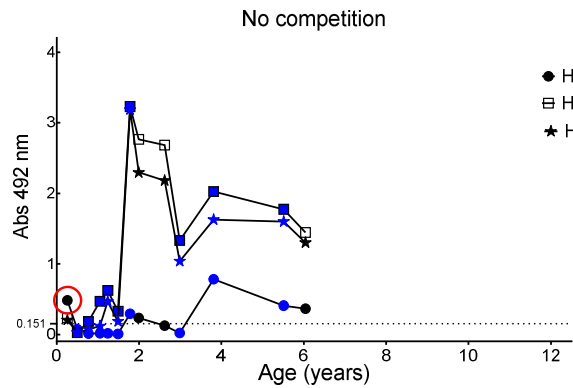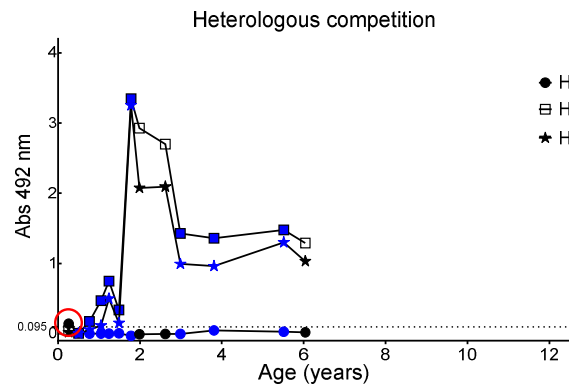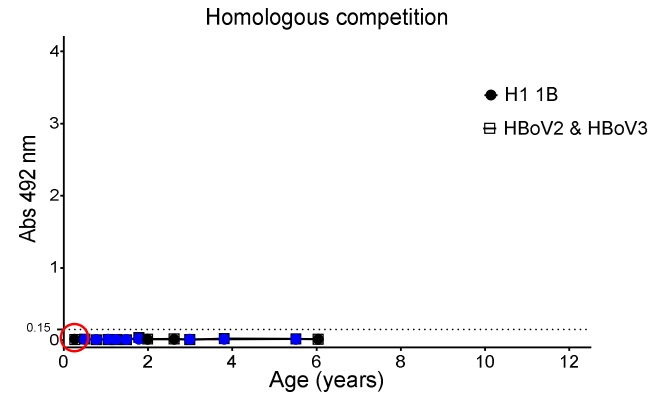

125

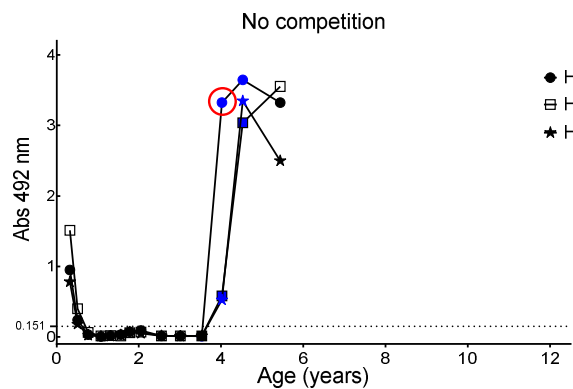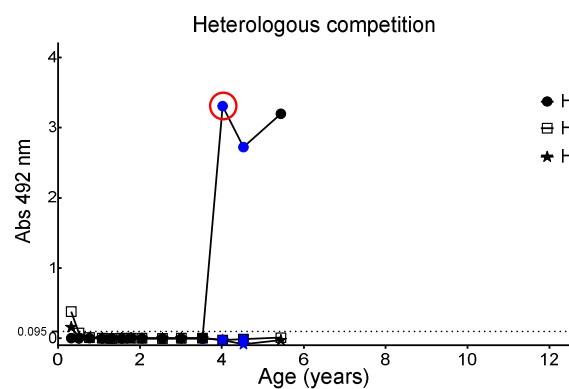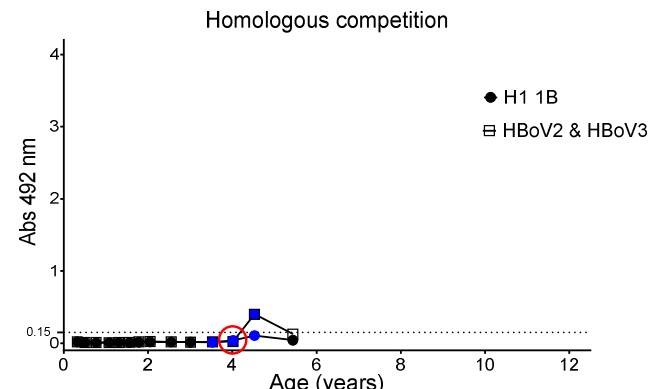

126

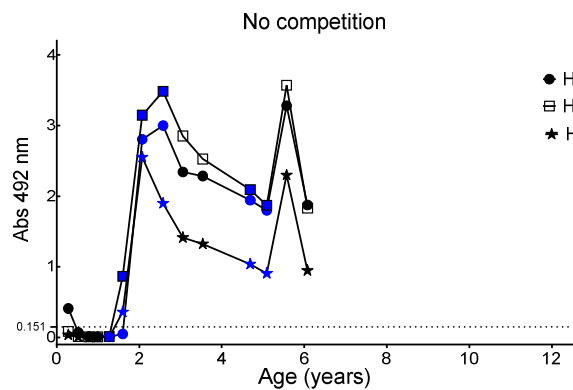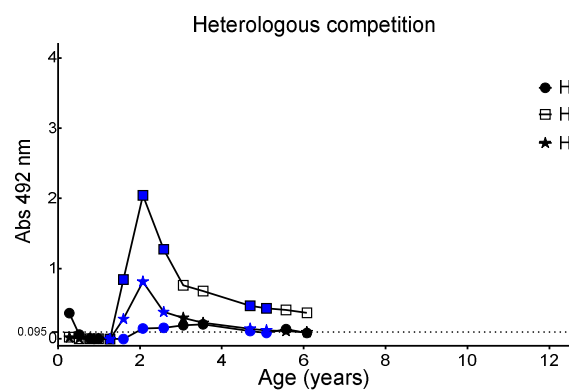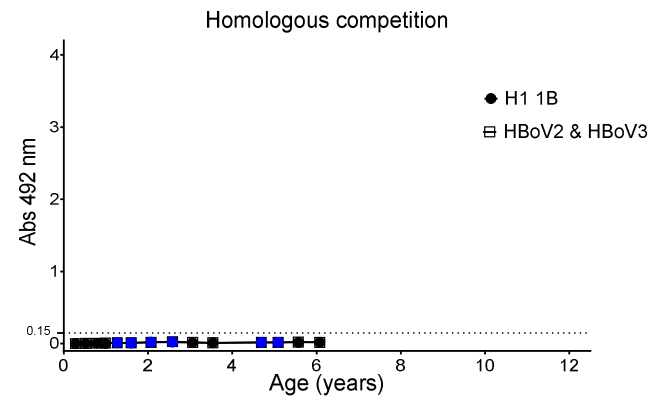

127

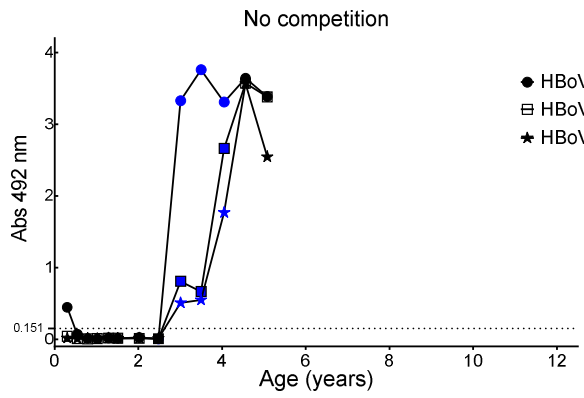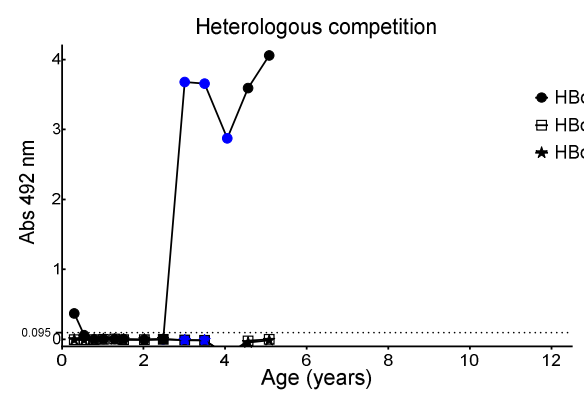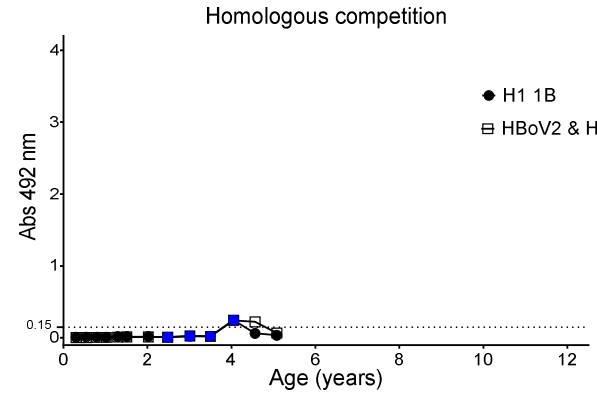

128

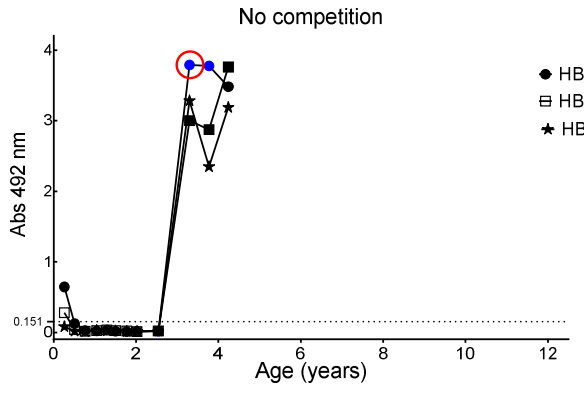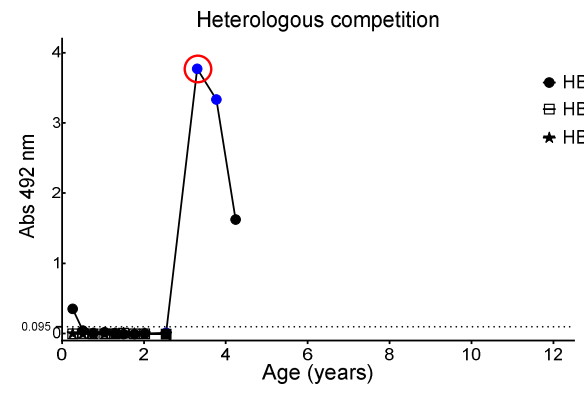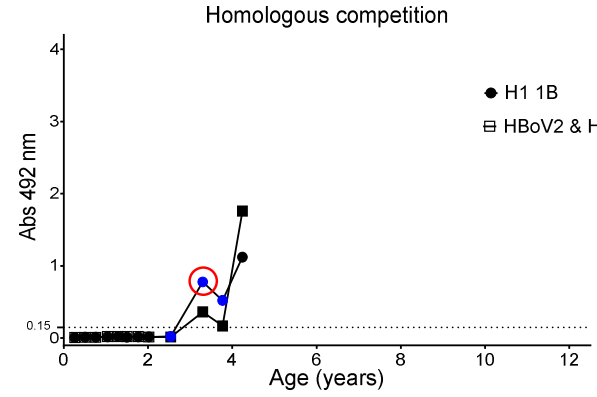

129

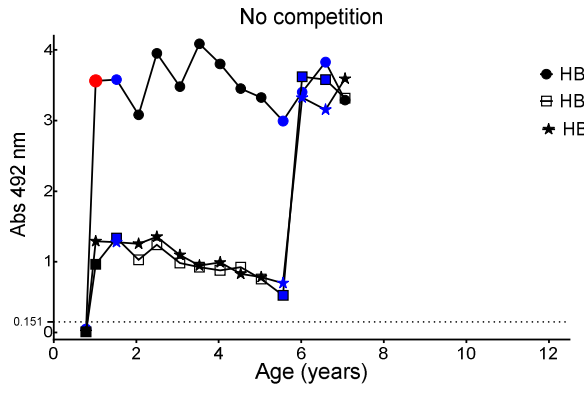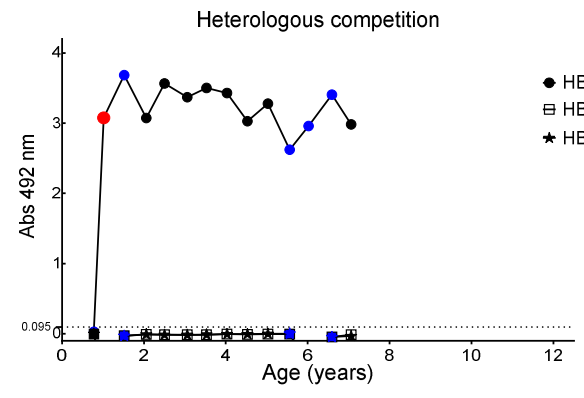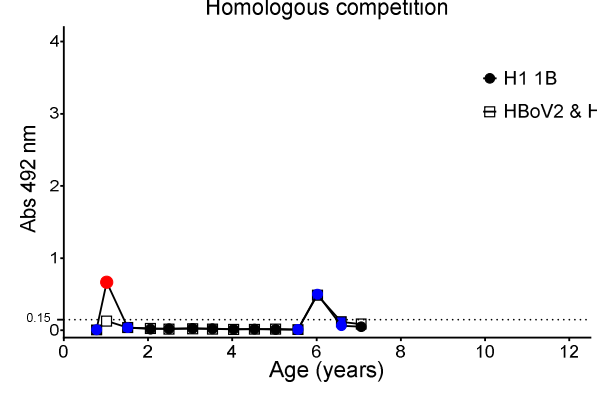

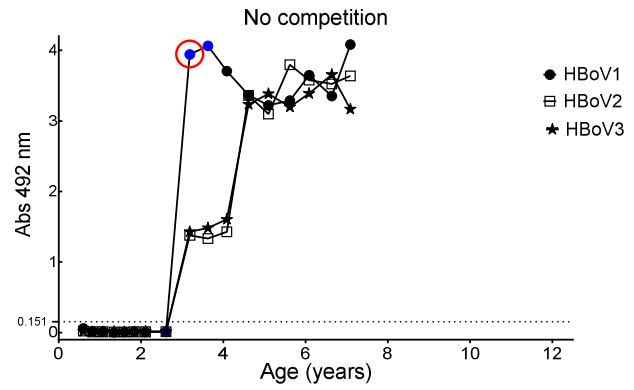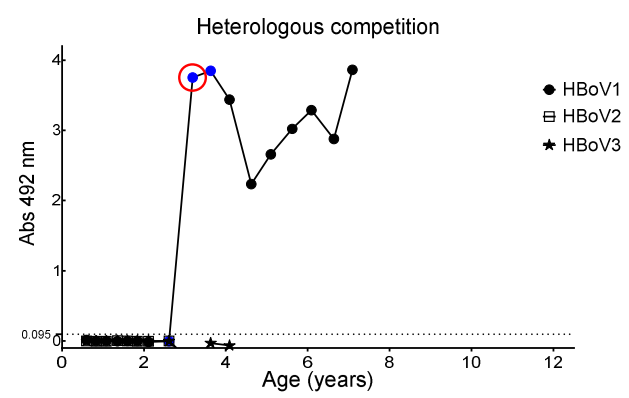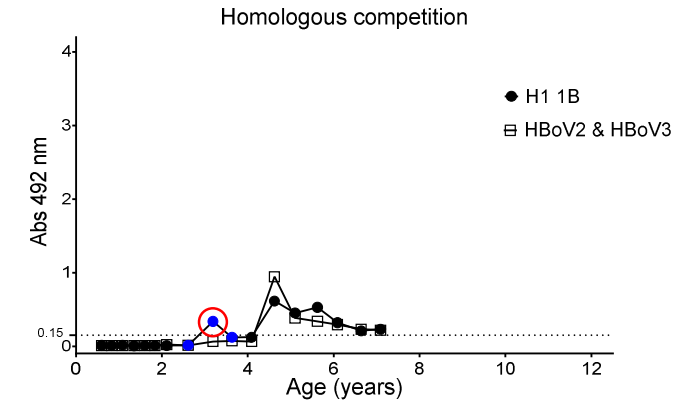

Supplement: pone.0139096.s001.pdf [file pone.0139096.s001.pdf]
